# Supplementary material for: A systematic review and meta-analysis of effects of menopausal hormone therapy on cardiovascular diseases
Source: PubMed Central journal article supplement (PMC7691511; doi:10.1038/s41598-020-77534-9), 2020-11-26
Supplement: 41598_2020_77534_MOESM1_ESM.pdf [file 41598_2020_77534_MOESM1_ESM.pdf]

## Supplementary Figures

### A systematic review and meta-analysis of effects of menopausal hormone therapy on cardiovascular diseases

Ji-Eun Kim<sup>1,2</sup>, Jae-Hyuck Chang<sup>3</sup>, Min-Ji Jeong<sup>3</sup>, Jaesung Choi<sup>1,2</sup>, JooYong Park<sup>1,2</sup>, Chaewon Baek<sup>3</sup>,  
Aesun Shin<sup>4,5,6</sup>, Sang Min Park<sup>1,7</sup>, Daehee Kang<sup>4,5,6,8</sup> and Ji-Yeob Choi<sup>1,2,5,9\*</sup>

<sup>1</sup>Department of Biomedical Sciences, Seoul National University Graduate School, Seoul, Korea;

<sup>2</sup>BK21plus Biomedical Science Project, Seoul National University College of Medicine, Seoul, Korea

<sup>3</sup>Northeastern University Bouve College of Health Sciences School of Pharmacy, Boston, MA, USA;

<sup>4</sup>Department of Preventive Medicine, Seoul National University College of Medicine, Seoul, Korea;

<sup>5</sup>Cancer Research Institute, Seoul National University, Seoul, Korea;

<sup>6</sup>Department of Innovative Medical Science, Seoul National University College of Medicine, Seoul, Korea;

<sup>7</sup>Department of Family Medicine, Seoul National University College of Medicine, Seoul, Korea;

<sup>8</sup>Institute of Environmental Medicine, Seoul National University Medical Research Center, Seoul, Korea;

<sup>9</sup>Institute of Health Policy and Management, Seoul National University Medical Research Center, Seoul, Korea

**Supplementary Figure S1.1.** Pooled results of MHT and all-cause death in the RCTs: (a) forest plot and (b) funnel plot.

**Supplementary Figure S1.2.** Pooled results of MHT and cardiovascular death in the RCTs: (a) forest plot and (b) funnel plot.

**Supplementary Figure S1.3.** Pooled results of MHT and stroke in the RCTs: (a) forest plot and (b) funnel plot.

**Supplementary Figure S1.4.** Pooled results of MHT and VTE in the RCTs: (a) forest plot and (b) funnel plot.

**Supplementary Figure S1.5.** Pooled results of MHT and PE in the RCTs: (a) forest plot and (b) funnel plot.

**Supplementary Figure S1.6.** Pooled results of MHT and MI in the RCTs: (a) forest plot and (b) funnel plot.

**Supplementary Figure S1.7.** Pooled results of MHT and CHD in the RCTs: (a) forest plot and (b) funnel plot.

**Supplementary Figure S1.8.** Pooled results of MHT and angina in the RCTs: (a) forest plot and (b) funnel plot.

**Supplementary Figure S1.9.** Pooled results of MHT and revascularization in the RCTs: (a) forest plot and (b) funnel plot.

**Supplementary Figure S2.1.** Pooled results of MHT and all-cause death in the observational studies: (a) forest plot and (b) funnel plot.

**Supplementary Figure S2.2.** Pooled results of MHT and cardiovascular death in the observational studies: (a) forest plot and (b) funnel plot.

**Supplementary Figure S2.3.** Pooled results of MHT and stroke in the observational studies: (a) forest plot and (b) funnel plot.

**Supplementary Figure S2.4.** Pooled results of MHT and VTE in the observational studies: (a) forest plot and (b) funnel plot.

**Supplementary Figure S2.5.** Pooled results of MHT and PE in the observational studies: (a) forest plot and (b) funnel plot.

**Supplementary Figure S2.6.** Pooled results of MHT and MI in the observational studies: (a) forest plot and (b) funnel plot.

**Supplementary Figure S2.7.** Pooled results of MHT and CHD in the observational studies: (a) forest plot and (b) funnel plot.

**Supplementary Figure S2.8.** Pooled results of MHT and angina in the observational studies: (a) forest plot.

**Supplementary Figure S3.1.1.** MHT and all-cause death in RCTs: subgroup results by regimen type.

**Supplementary Figure S3.1.2.** MHT and all-cause death in RCTs: subgroup results by duration of use.

**Supplementary Figure S3.1.3.** MHT and all-cause death in RCTs: subgroup results by timing of initiation.

**Supplementary Figure S3.1.4.** MHT and all-cause death in RCTs: subgroup results by underlying disease.

**Supplementary Figure S3.2.1.** MHT and cardiovascular death in RCTs: subgroup results by regimen type.

**Supplementary Figure S3.2.2.** MHT and cardiovascular death in RCTs: subgroup results by duration of use.

**Supplementary Figure S3.2.3.** MHT and cardiovascular death in RCTs: subgroup results by timing of initiation.

**Supplementary Figure S3.2.4.** MHT and cardiovascular death in RCTs: subgroup results by underlying disease.

**Supplementary Figure S3.3.1.** MHT and stroke in RCTs: subgroup results by regimen type.

**Supplementary Figure S3.3.2.** MHT and stroke in RCTs: subgroup results by duration of use.

**Supplementary Figure S3.3.3.** MHT and stroke in RCTs: subgroup results by timing of initiation.

**Supplementary Figure S3.3.4.** MHT and stroke in RCTs: subgroup results by underlying disease.

**Supplementary Figure S3.4.1.** MHT and VTE in RCTs: subgroup results by regimen type.

**Supplementary Figure S3.4.2.** MHT and VTE in RCTs: subgroup results by duration of use.

**Supplementary Figure S3.4.3.** MHT and VTE in RCTs: subgroup results by timing of initiation.

**Supplementary Figure S3.4.4.** MHT and VTE in RCTs: subgroup results by underlying disease.

**Supplementary Figure S3.5.1.** MHT and PE in RCTs: subgroup results by regimen type.

**Supplementary Figure S3.5.2.** MHT and PE in RCTs: subgroup results by duration of use.

**Supplementary Figure S3.5.3.** MHT and PE in RCTs: subgroup results by timing of initiation.

**Supplementary Figure S3.5.4.** MHT and PE in RCTs: subgroup results by underlying disease.

**Supplementary Figure S3.6.1.** MHT and MI in RCTs: subgroup results by regimen type.

**Supplementary Figure S3.6.2.** MHT and MI in RCTs: subgroup results by duration of use.

**Supplementary Figure S3.6.3.** MHT and MI in RCTs: subgroup results by timing of initiation.

**Supplementary Figure S3.6.4.** MHT and MI in RCTs: subgroup results by underlying disease.

**Supplementary Figure S3.7.1.** MHT and CHD in RCTs: subgroup results by regimen type.

**Supplementary Figure S3.7.2.** MHT and CHD in RCTs: subgroup results by duration of use.

**Supplementary Figure S3.7.3.** MHT and CHD in RCTs: subgroup results by timing of initiation.

**Supplementary Figure S3.7.4.** MHT and CHD in RCTs: subgroup results by underlying disease.

**Supplementary Figure S3.8.1.** MHT and angina in RCTs: subgroup results by regimen type.

**Supplementary Figure S3.8.2.** MHT and angina in RCTs: subgroup results by duration of use.

**Supplementary Figure S3.8.3.** MHT and angina in RCTs: subgroup results by timing of initiation.

**Supplementary Figure S3.8.4.** MHT and angina in RCTs: subgroup results by underlying disease.

**Supplementary Figure S3.9.1.** MHT and revascularization in RCTs: subgroup results by regimen type.

**Supplementary Figure S3.9.2.** MHT and revascularization in RCTs: subgroup results by duration of use.

**Supplementary Figure S3.9.3.** MHT and revascularization in RCTs: subgroup results by timing of initiation.

**Supplementary Figure S3.9.4.** MHT and revascularization in RCTs: subgroup results by underlying disease.

**Supplementary Figure S4.1.1.** MHT and all-cause death in observational studies: subgroup results by regimen type.

**Supplementary Figure S4.1.2.** MHT and all-cause death in observational studies: subgroup results by duration of use.

**Supplementary Figure S4.1.3.** MHT and all-cause death in observational studies: subgroup results by timing of initiation.

**Supplementary Figure S4.1.4.** MHT and all-cause death in observational studies: subgroup results by route of administration.

**Supplementary Figure S4.1.5.** MHT and all-cause death in observational studies: subgroup results by underlying disease.

**Supplementary Figure S4.1.6.** MHT and all-cause death in observational studies: subgroup results by recency of MHT.

**Supplementary Figure S4.1.7.** MHT and all-cause death in observational studies: subgroup results by study design.

**Supplementary Figure S4.1.8.** MHT and all-cause death in observational studies: subgroup results by study quality.

**Supplementary Figure S4.2.1.** MHT and stroke in observational studies: subgroup results by regimen type.

**Supplementary Figure S4.2.2.** MHT and stroke in observational studies: subgroup results by duration of use.

**Supplementary Figure S4.2.3.** MHT and stroke in observational studies: subgroup results by timing of initiation.

**Supplementary Figure S4.2.4.** MHT and stroke in observational studies: subgroup results by route of administration.

**Supplementary Figure S4.2.5.** MHT and stroke in observational studies: subgroup results by underlying disease.

**Supplementary Figure S4.2.6.** MHT and stroke in observational studies: subgroup results by recency of MHT.

**Supplementary Figure S4.2.7.** MHT and stroke in observational studies: subgroup results by study design.

**Supplementary Figure S4.2.8.** MHT and stroke in observational studies: subgroup results by study quality.

**Supplementary Figure S4.3.1.** MHT and VTE in observational studies: subgroup results by regimen type.

**Supplementary Figure S4.3.2.** MHT and VTE in observational studies: subgroup results by duration of use.

**Supplementary Figure S4.3.3.** MHT and VTE in observational studies: subgroup results by timing of initiation.

**Supplementary Figure S4.3.4.** MHT and VTE in observational studies: subgroup results by route of administration.

**Supplementary Figure S4.3.5.** MHT and VTE in observational studies: subgroup results by underlying disease.

**Supplementary Figure S4.3.6.** MHT and VTE in observational studies: subgroup results by recency of MHT.

**Supplementary Figure S4.3.7.** MHT and VTE in observational studies: subgroup results by study design.

**Supplementary Figure S4.3.8.** MHT and VTE in observational studies: subgroup results by study quality.

**Supplementary Figure S4.4.1.** MHT and MI in observational studies: subgroup results by regimen type.

**Supplementary Figure S4.4.2.** MHT and MI in observational studies: subgroup results by duration of use.

**Supplementary Figure S4.4.3.** MHT and MI in observational studies: subgroup results by timing of initiation.

**Supplementary Figure S4.4.4.** MHT and MI in observational studies: subgroup results by route of administration.

**Supplementary Figure S4.4.5.** MHT and MI in observational studies: subgroup results by underlying disease.

**Supplementary Figure S4.4.6.** MHT and MI in observational studies: subgroup results by recency of MHT.

**Supplementary Figure S4.4.7.** MHT and MI in observational studies: subgroup results by study design.

**Supplementary Figure S4.4.8.** MHT and MI in observational studies: subgroup results by study quality.

Supplementary Figure S1.1. Pooled results of MHT and all-cause death in the RCTs: (a) forest plot and (b) funnel plot.

(a)

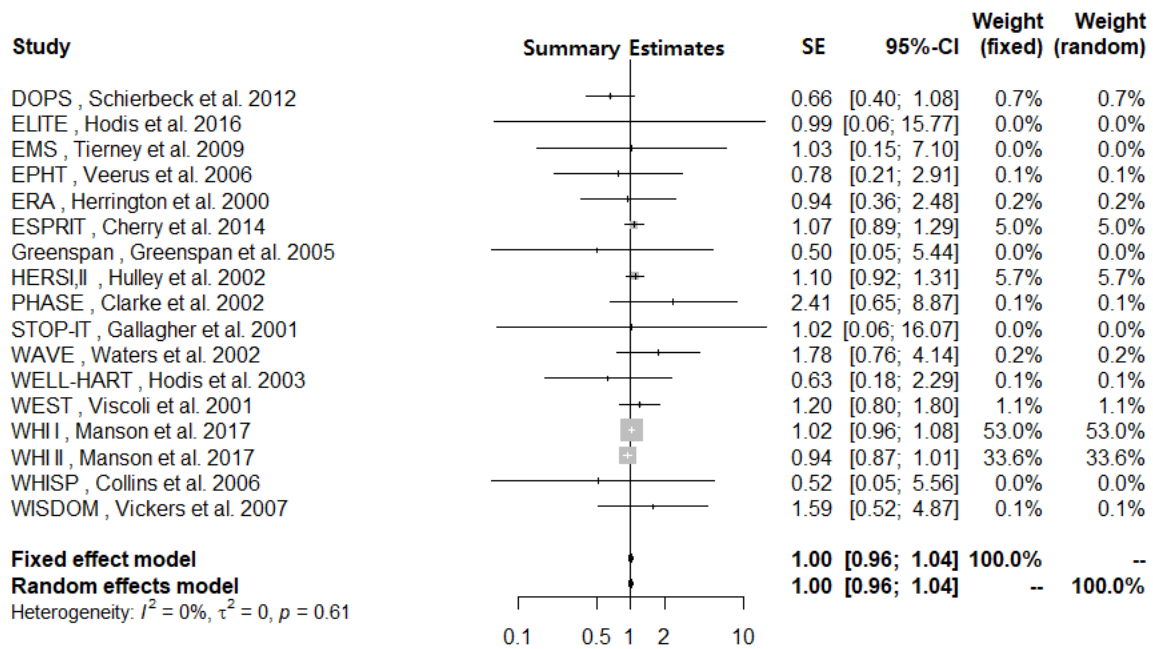

(b)

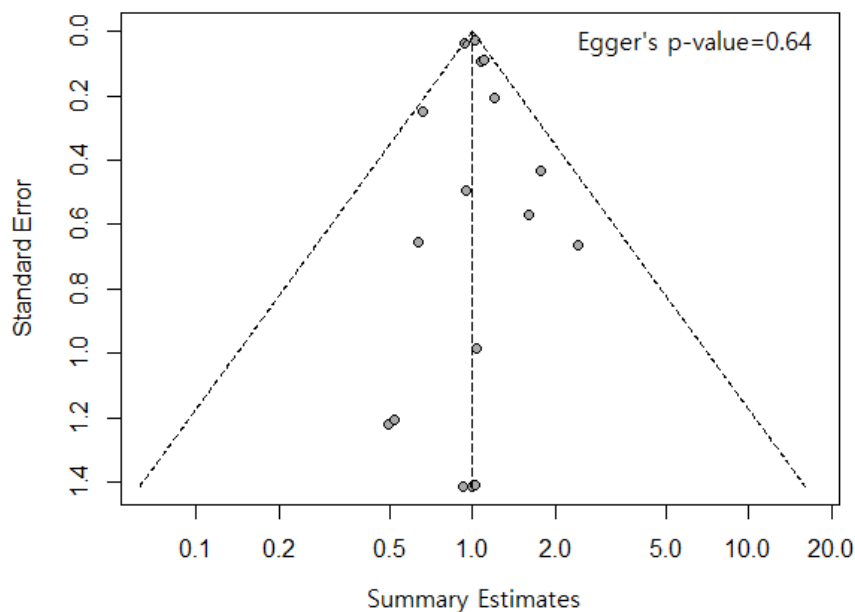

Summary estimates (95% CI) were measured by fixed-effect models if  $I^2$  was  $<30\%$  and  $P$  for heterogeneity was  $>0.05$ ; otherwise, the summary estimates (95% CI) were measured by random-effect models. Forest and funnel plots were generated by "meta" package in R version 3.4.1. MHT, menopausal hormone therapy; RCTs, randomized controlled trials; SE, summary estimates.

Supplementary Figure S1.2. Pooled results of MHT and cardiovascular death in the RCTs: (a) forest plot and (b) funnel plot.

(a)

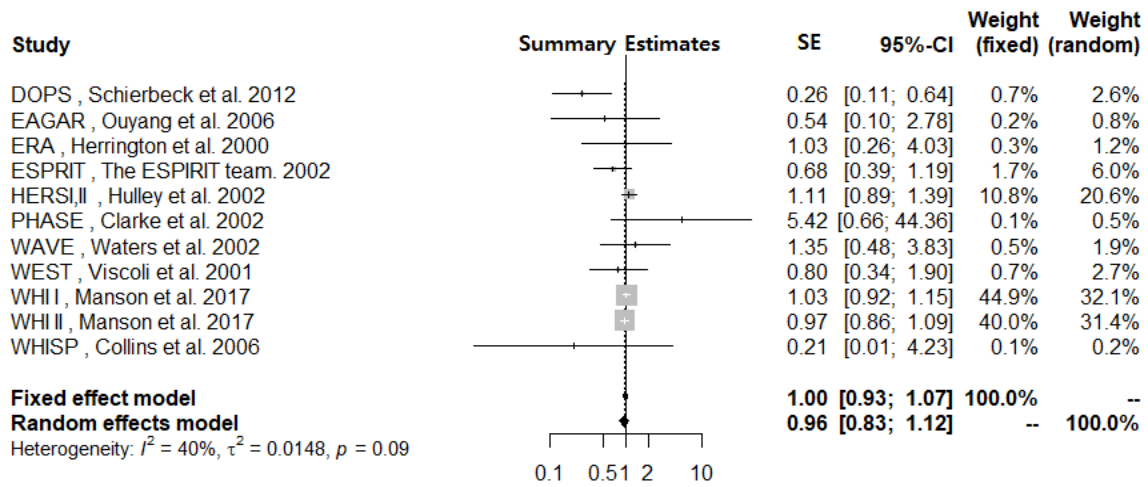

(b)

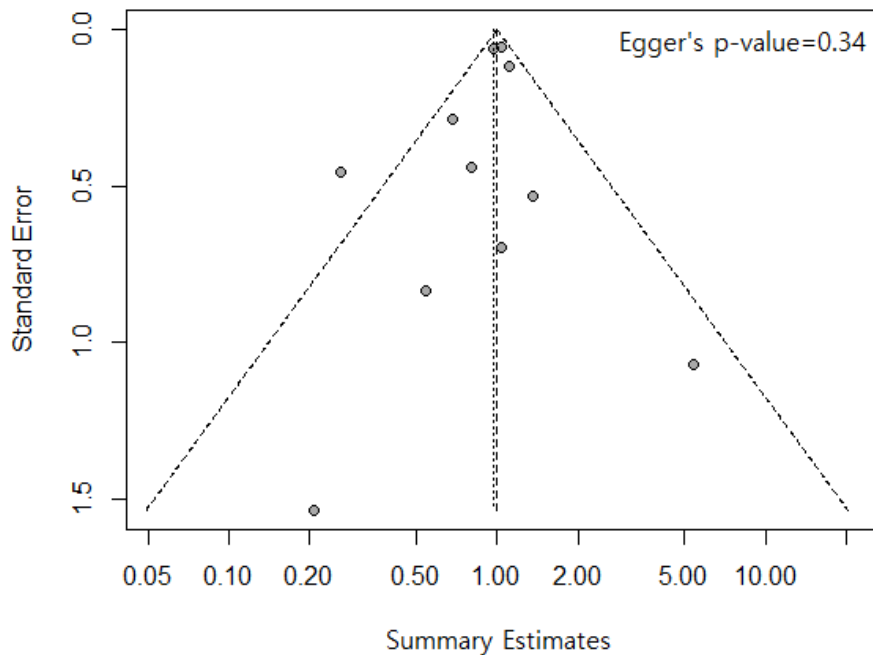

Summary estimates (95% CI) were measured by fixed-effect models if  $I^2$  was  $<30%$  and  $P$  for heterogeneity was  $>0.05$ ; otherwise, the summary estimates (95% CI) were measured by random-effect models. Forest and funnel plots were generated by "meta" package in R version 3.4.1. MHT, menopausal hormone therapy; RCTs, randomized controlled trials; SE, summary estimates.

Supplementary Figure S1.3. Pooled results of MHT and stroke in the RCTs: (a) forest plot and (b) funnel plot.

(a)

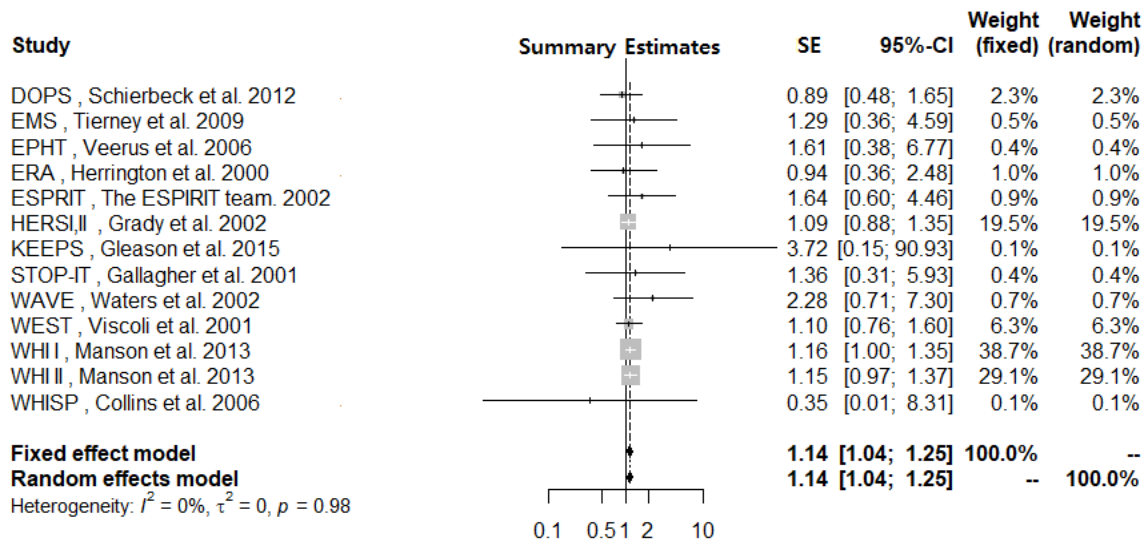

(b)

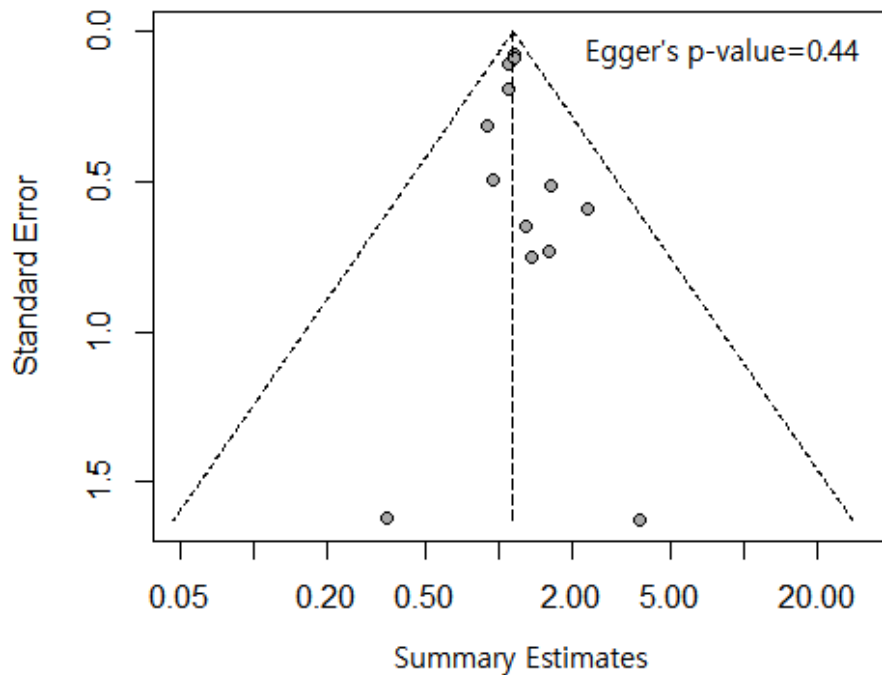

Summary estimates (95% CI) were measured by fixed-effect models if  $I^2$  was  $<30\%$  and  $P$  for heterogeneity was  $>0.05$ ; otherwise, the summary estimates (95% CI) were measured by random-effect models. Forest and funnel plots were generated by "meta" package in R version 3.4.1. MHT, menopausal hormone therapy; RCTs, randomized controlled trials; SE, summary estimates.

Supplementary Figure S1.4. Pooled results of MHT and VTE in the RCTs: (a) forest plot and (b) funnel plot.

(a)

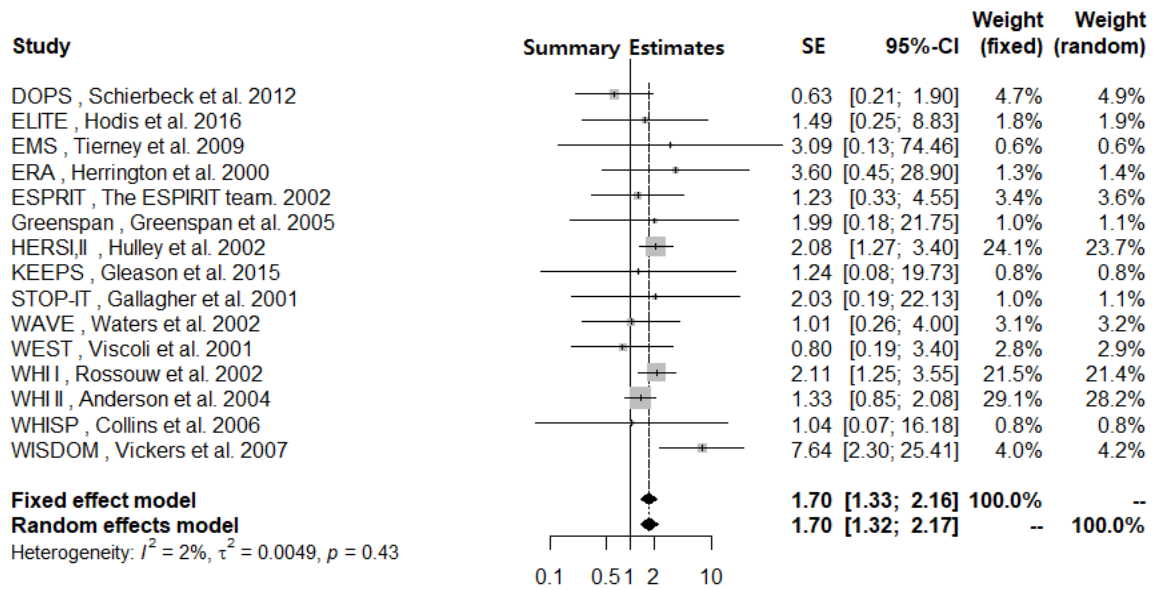

(b)

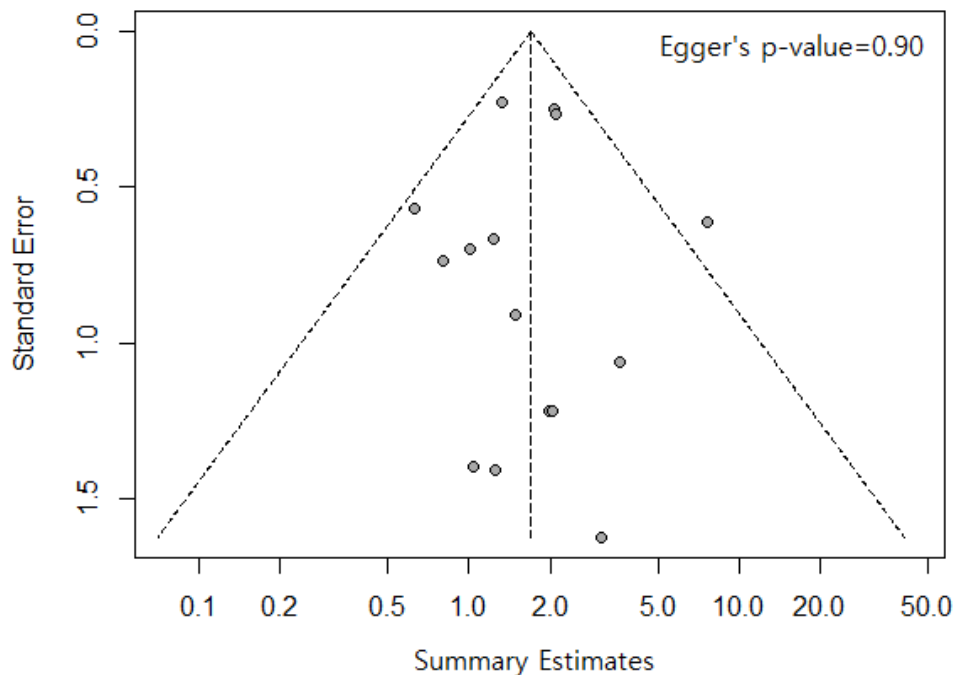

Summary estimates (95% CI) were measured by fixed-effect models if  $I^2$  was  $<30\%$  and  $P$  for heterogeneity was  $>0.05$ ; otherwise, the summary estimates (95% CI) were measured by random-effect models. Forest and funnel plots were generated by "meta" package in R version 3.4.1. MHT, menopausal hormone therapy; RCTs, randomized controlled trials; SE, summary estimates; VTE, venous thromboembolism.



Supplementary Figure S1.5. Pooled results of MHT and PE in the RCTs: (a) forest plot and (b) funnel plot.

(a)

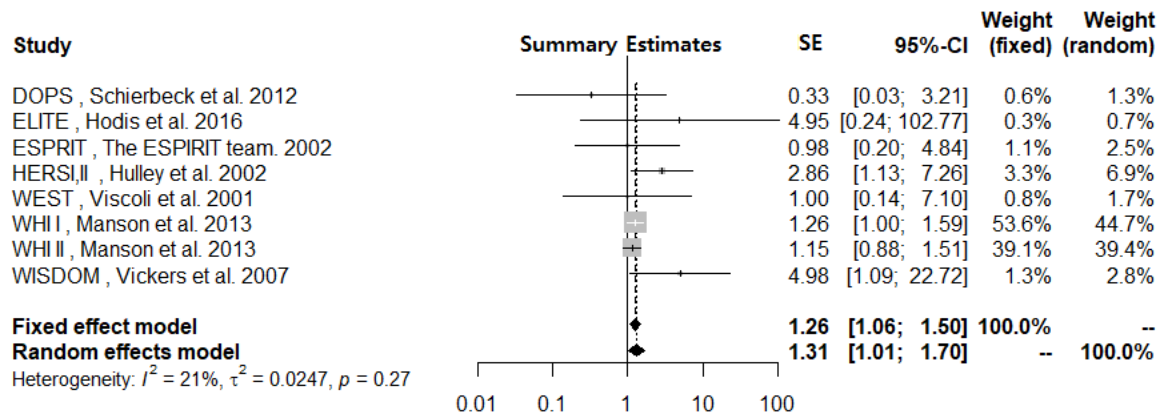

(b)

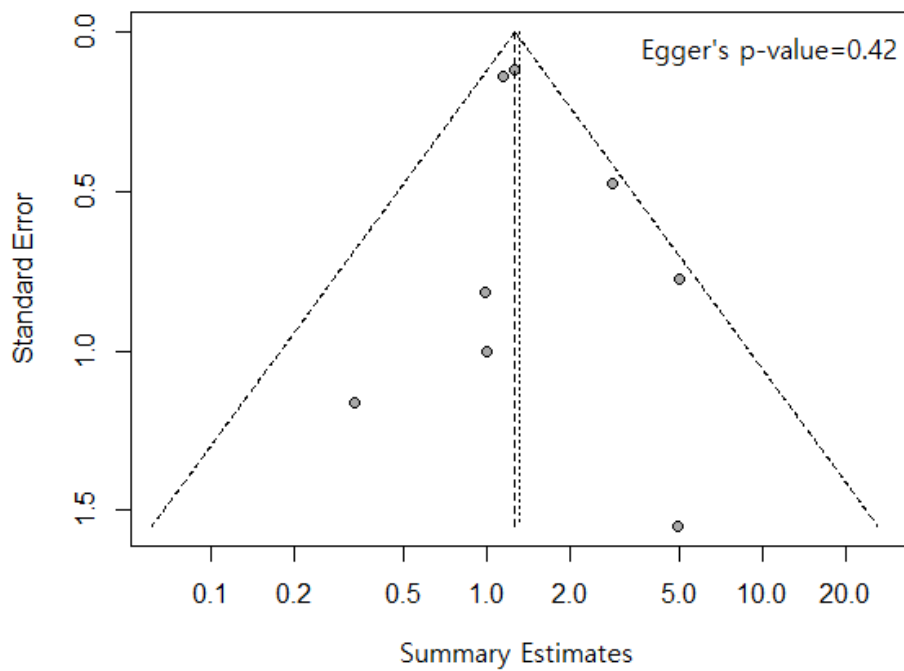

Summary estimates (95% CI) were measured by fixed-effect models if  $I^2$  was  $<30\%$  and  $P$  for heterogeneity was  $>0.05$ ; otherwise, the summary estimates (95% CI) were measured by random-effect models. Forest and funnel plots were generated by "meta" package in R version 3.4.1. MHT, menopausal hormone therapy; PE, pulmonary embolism; RCTs, randomized controlled trials; SE, summary estimates.

Supplementary Figure S1.6. Pooled results of MHT and MI in the RCTs: (a) forest plot and (b) funnel plot.

(a)

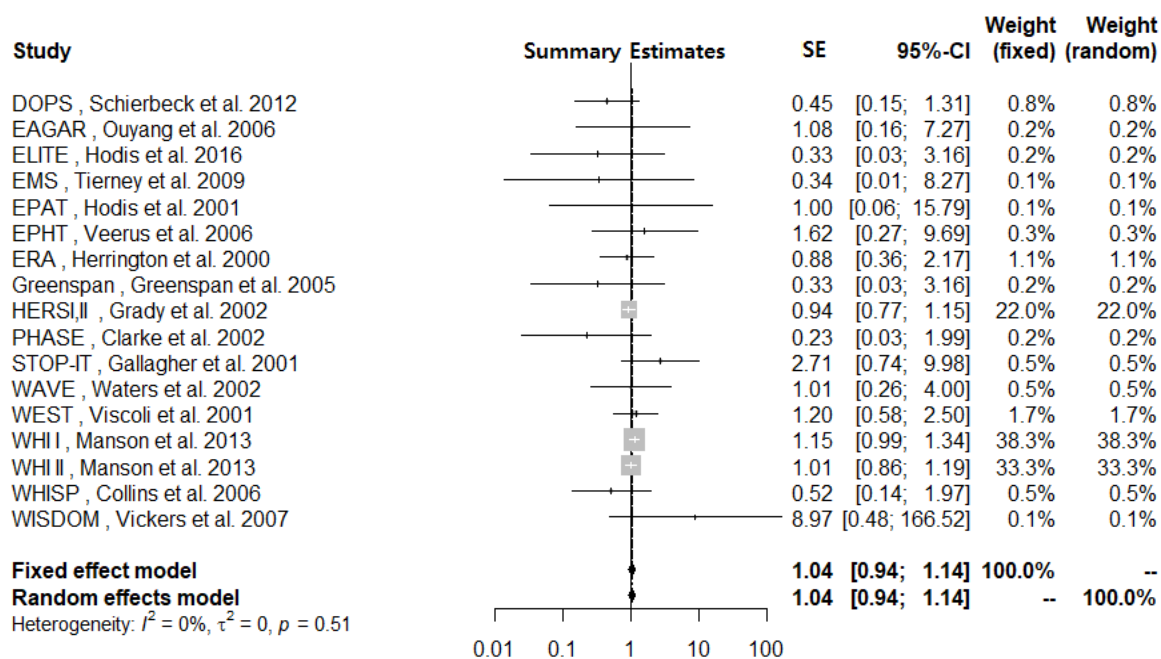

(b)

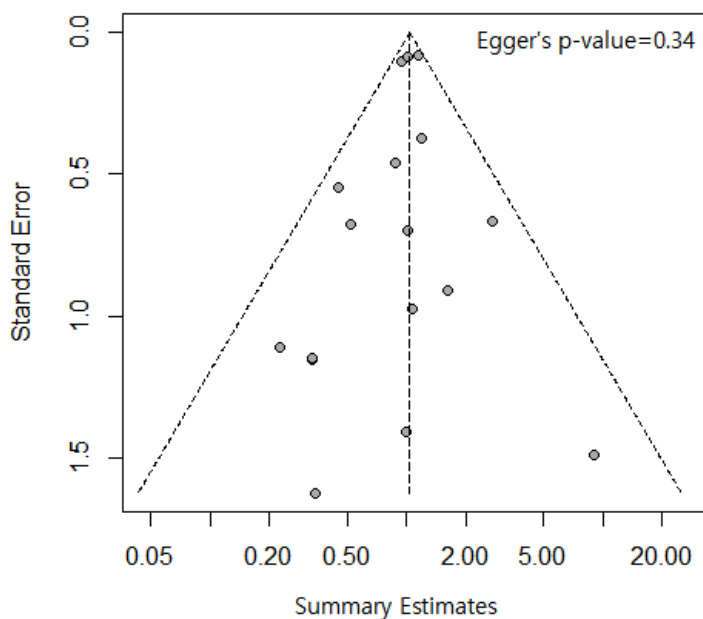

Summary estimates (95% CI) were measured by fixed-effect models if  $I^2$  was  $<30\%$  and  $P$  for heterogeneity was  $>0.05$ ; otherwise, the summary estimates (95% CI) were measured by random-effect models. Forest and funnel plots were generated by "meta" package in R version 3.4.1. MHT, menopausal hormone therapy; MI, myocardial infarction; RCTs, randomized controlled trials; SE, summary estimates.

Supplementary Figure S1.7. Pooled results of MHT and CHD in the RCTs: (a) forest plot and (b) funnel plot.

(a)

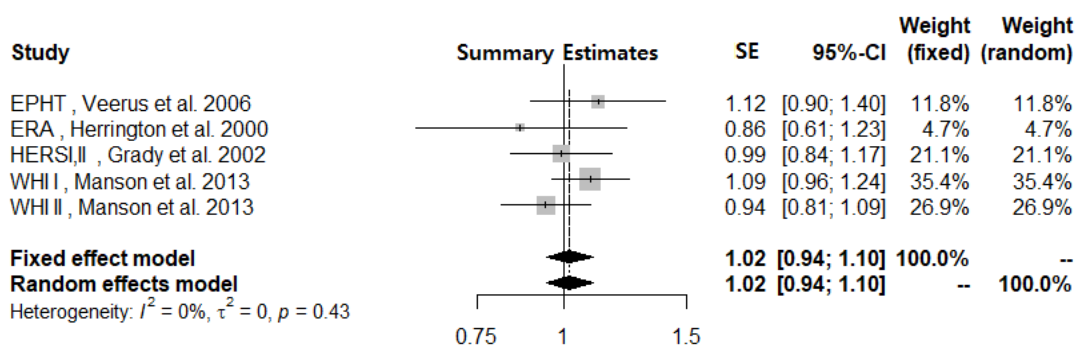

(b)

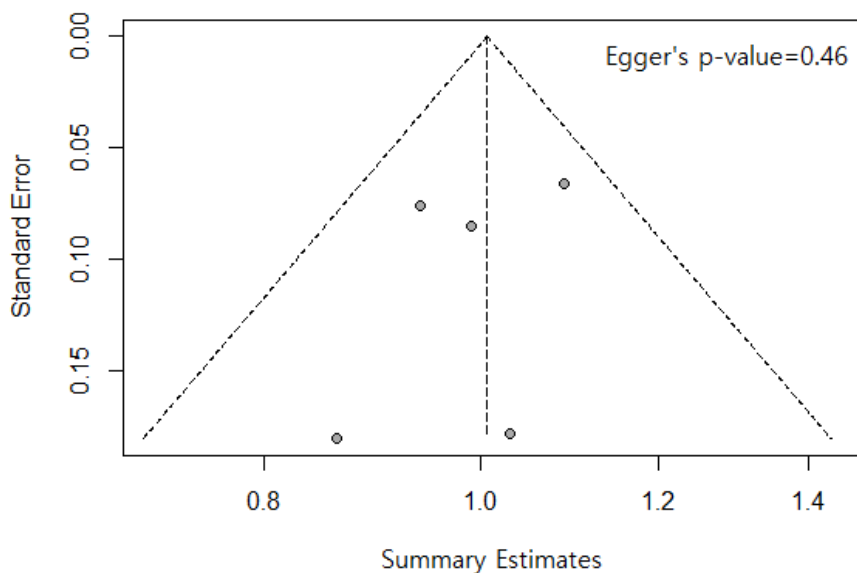

Summary estimates (95% CI) were measured by fixed-effect models if  $I^2$  was  $<30\%$  and  $P$  for heterogeneity was  $>0.05$ ; otherwise, the summary estimates (95% CI) were measured by random-effect models. Forest and funnel plots were generated by "meta" package in R version 3.4.1. CHD, coronary heart disease; MHT, menopausal hormone therapy; RCTs, randomized controlled trials; SE, summary estimates.

Supplementary Figure S1.8. Pooled results of MHT and angina in the RCTs: (a) forest plot and (b) funnel plot.

(a)

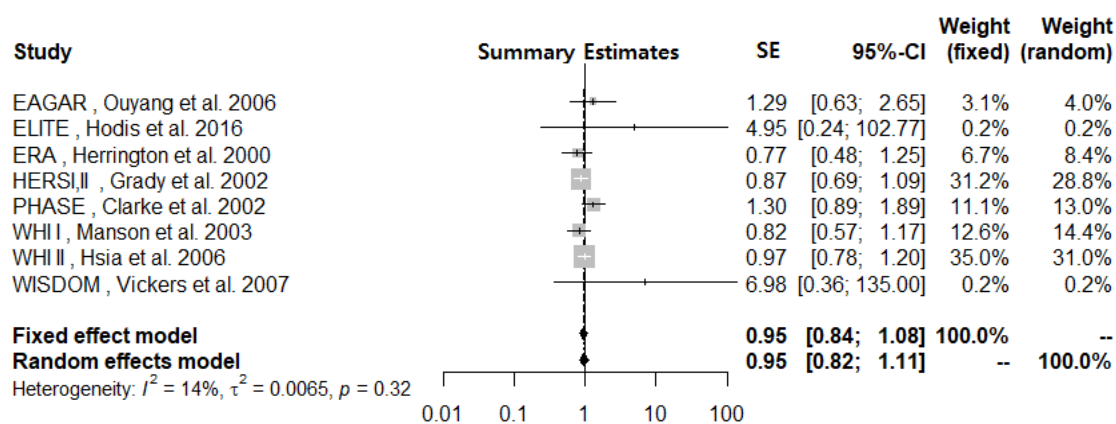

(b)

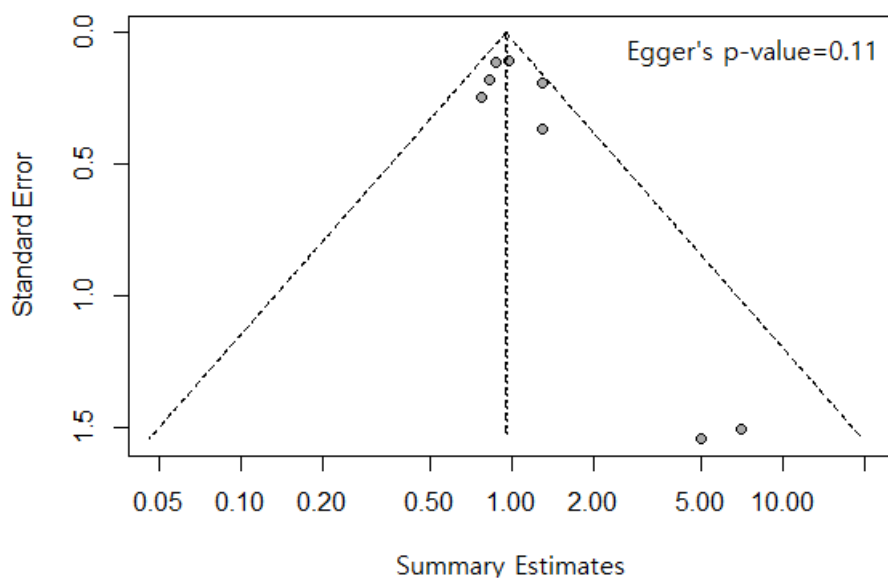

Summary estimates (95% CI) were measured by fixed-effect models if  $I^2$  was  $<30\%$  and  $P$  for heterogeneity was  $>0.05$ ; otherwise, the summary estimates (95% CI) were measured by random-effect models. Forest and funnel plots were generated by "meta" package in R version 3.4.1. MHT, menopausal hormone therapy; RCTs, randomized controlled trials; SE, summary estimates.

Supplementary Figure S1.9. Pooled results of MHT and revascularization in the RCTs: (a) forest plot and (b) funnel plot.

(a)

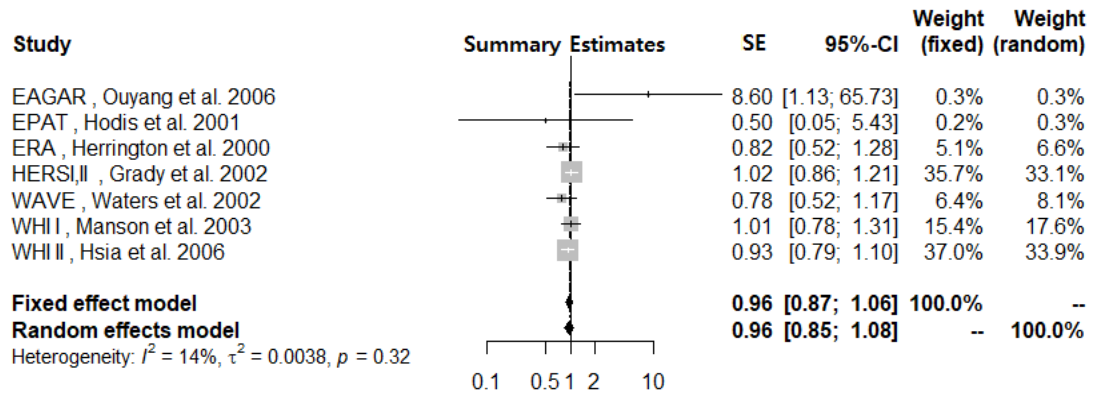

(b)

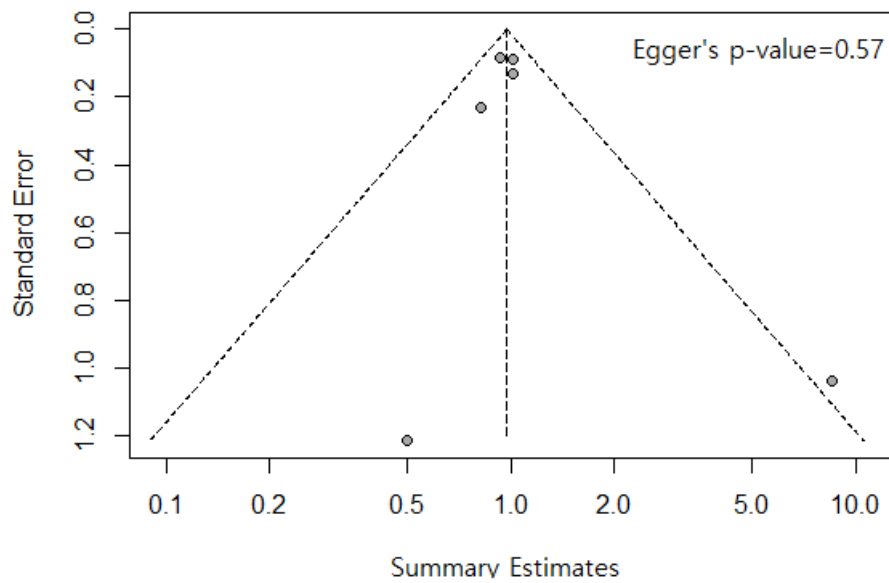

Summary estimates (95% CI) were measured by fixed-effect models if  $I^2$  was  $<30\%$  and  $P$  for heterogeneity was  $>0.05$ ; otherwise, the summary estimates (95% CI) were measured by random-effect models. Forest and funnel plots were generated by "meta" package in R version 3.4.1. MHT, menopausal hormone therapy; RCTs, randomized controlled trials; SE, summary estimates.

Supplementary Figure S2.1. Pooled results of MHT and all-cause death in the observational studies: (a) forest plot and (b) funnel plot.

(a)

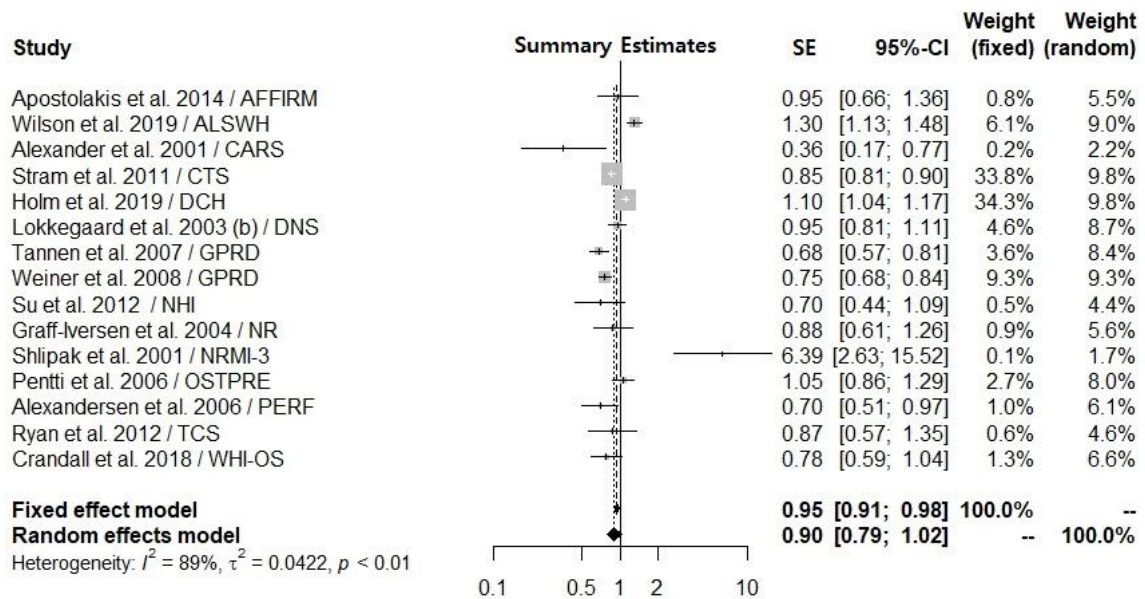

(b)

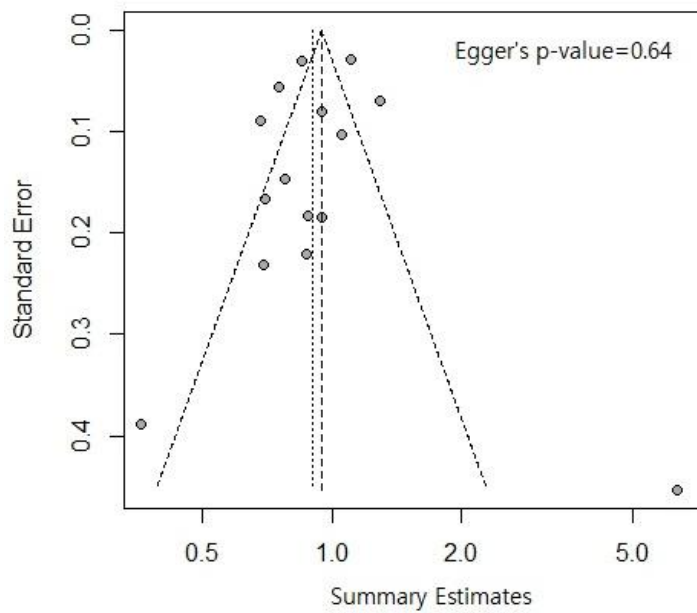

Summary estimates (95% CI) were measured by fixed-effect models if  $I^2$  was  $<30\%$  and  $P$  for heterogeneity was  $>0.05$ ; otherwise, the summary estimates (95% CI) were measured by random-effect models. Forest and funnel plots were generated by "meta" package in R version 3.4.1. MHT, menopausal hormone therapy; SE, summary estimates.

Supplementary Figure S2.2. Pooled results of MHT and cardiovascular death in the observational studies: (a) forest plot and (b) funnel plot.

(a)

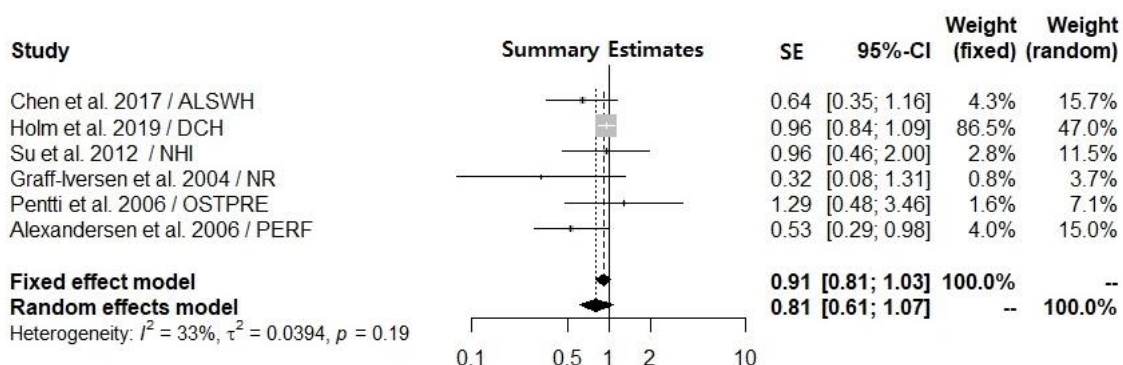

(b)

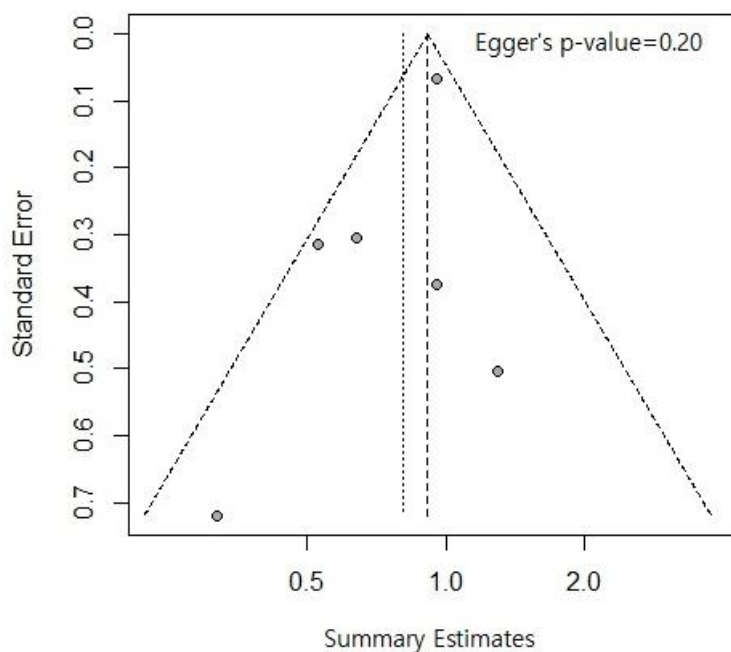

Summary estimates (95% CI) were measured by fixed-effect models if  $I^2$  was  $<30\%$  and  $P$  for heterogeneity was  $>0.05$ ; otherwise, the summary estimates (95% CI) were measured by random-effect models. Forest and funnel plots were generated by "meta" package in R version 3.4.1. MHT, menopausal hormone therapy; SE, summary estimates.

Supplementary Figure S2.3. Pooled results of MHT and stroke in the observational studies: (a) forest plot and (b) funnel plot.

(a)

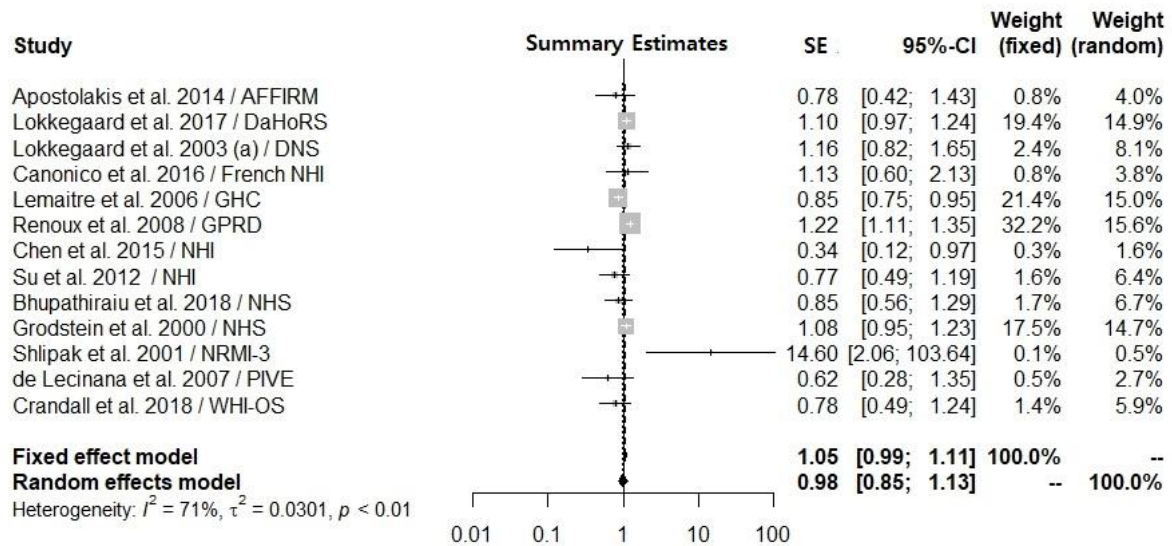

(b)

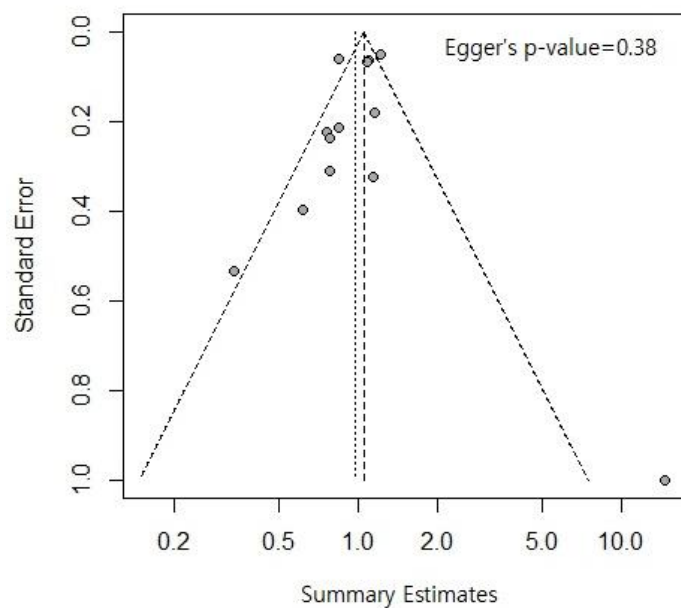

Summary estimates (95% CI) were measured by fixed-effect models if  $I^2$  was  $<30\%$  and  $P$  for heterogeneity was  $>0.05$ ; otherwise, the summary estimates (95% CI) were measured by random-effect models. Forest and funnel plots were generated by "meta" package in R version 3.4.1. MHT, menopausal hormone therapy; SE, summary estimates.



Supplementary Figure S2.4. Pooled results of MHT and VTE in the observational studies: (a) forest plot and (b) funnel plot.

(a)

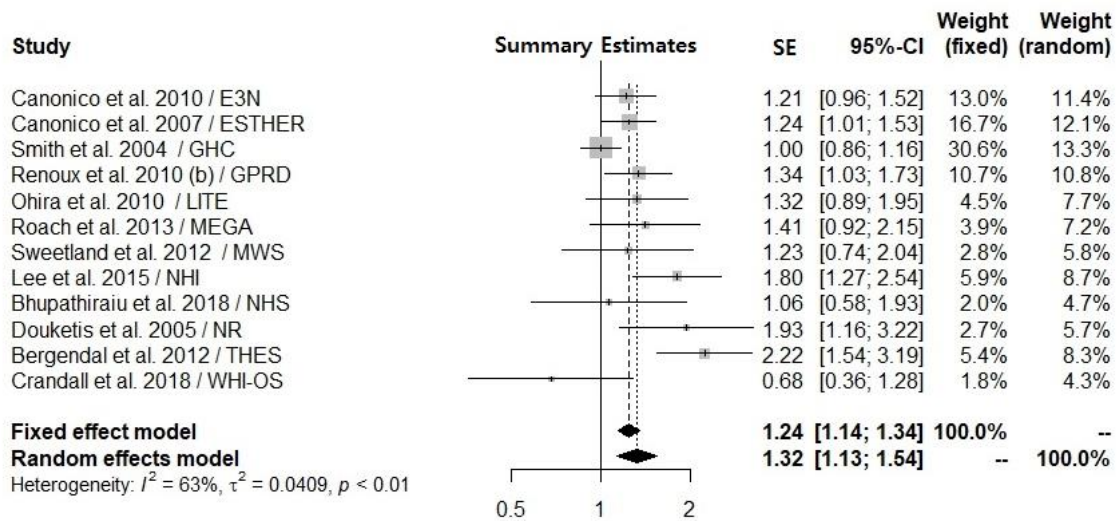

(b)

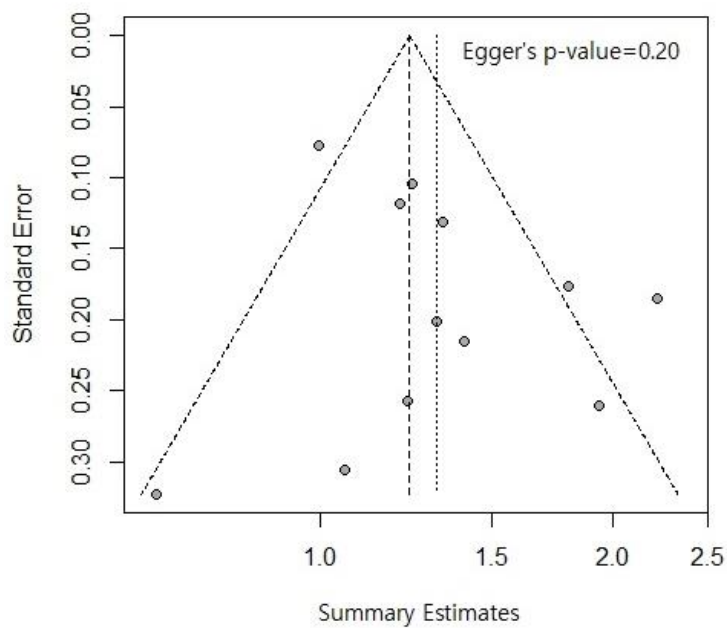

Summary estimates (95% CI) were measured by fixed-effect models if  $I^2$  was  $<30\%$  and  $P$  for heterogeneity was  $>0.05$ ; otherwise, the summary estimates (95% CI) were measured by random-effect models. Forest and funnel plots were generated by "meta" package in R version 3.4.1. MHT, menopausal hormone therapy; SE, summary estimates; VTE, venous thromboembolism.

Supplementary Figure S2.5. Pooled results of MHT and PE in the observational studies: (a) forest plot and (b) funnel plot.

(a)

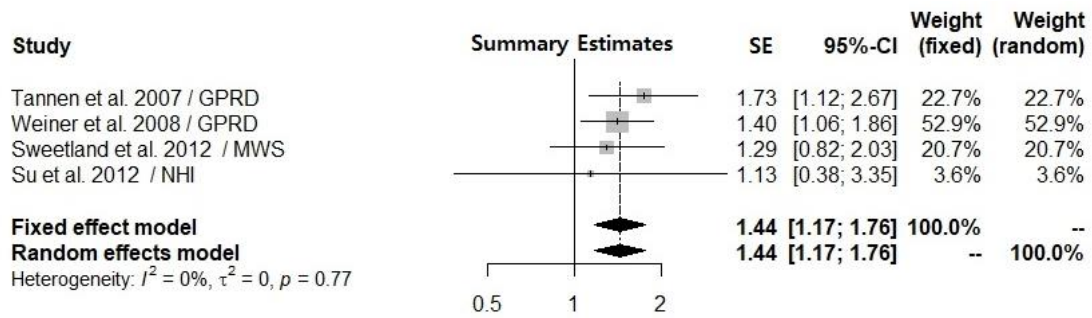

(b)

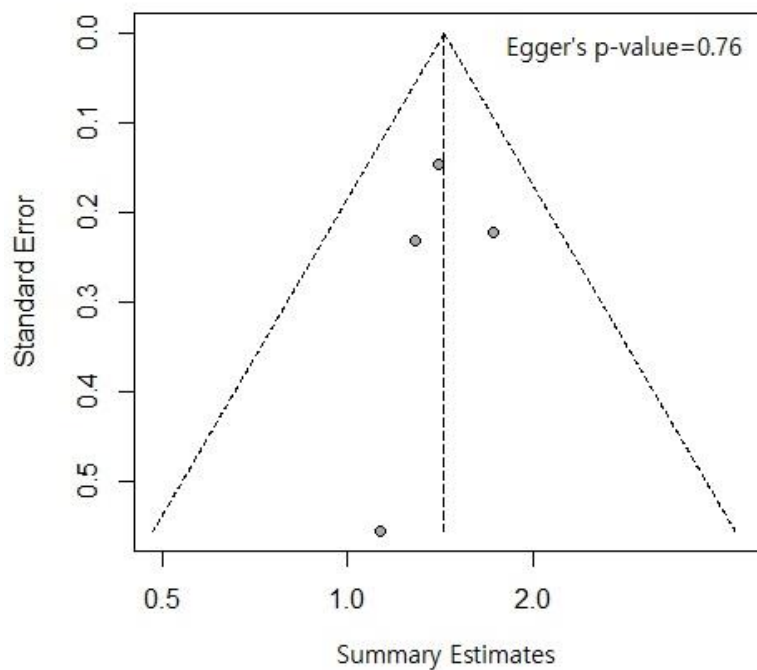

Summary estimates (95% CI) were measured by fixed-effect models if  $I^2$  was  $<30\%$  and  $P$  for heterogeneity was  $>0.05$ ; otherwise, the summary estimates (95% CI) were measured by random-effect models. Forest and funnel plots were generated by "meta" package in R version 3.4.1. MHT, menopausal hormone therapy; PE, pulmonary embolism; SE, summary estimates.

Supplementary Figure S2.6. Pooled results of MHT and MI in the observational studies: (a) forest plot and (b) funnel plot.

(a)

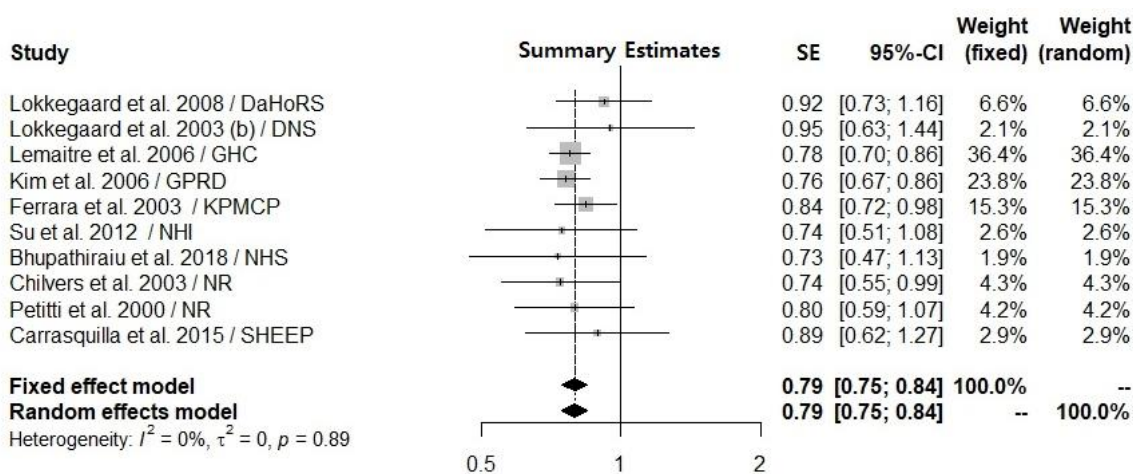

(b)

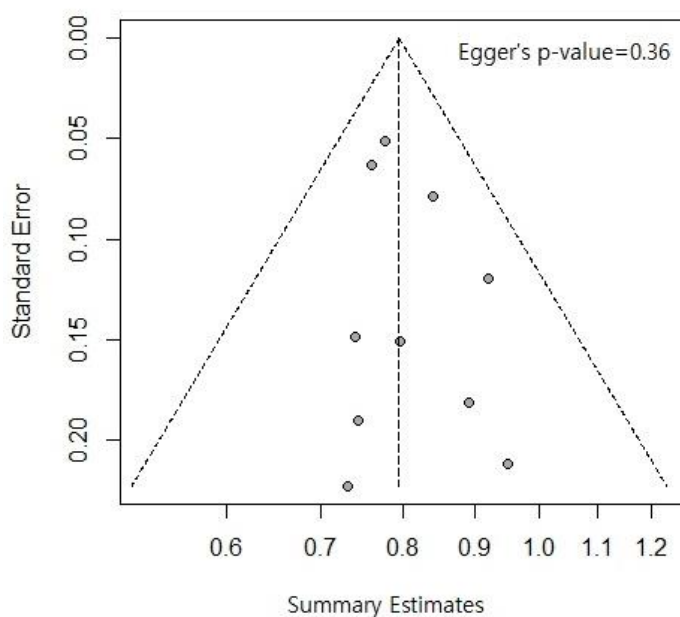

Summary estimates (95% CI) were measured by fixed-effect models if  $I^2$  was  $<30\%$  and  $P$  for heterogeneity was  $>0.05$ ; otherwise, the summary estimates (95% CI) were measured by random-effect models. Forest and funnel plots were generated by "meta" package in R version 3.4.1. MHT, menopausal hormone therapy; MI, myocardial infarction; SE, summary estimates.

Supplementary Figure S2.7. Pooled results of MHT and CHD in the observational studies: (a) forest plot and (b) funnel plot.

(a)

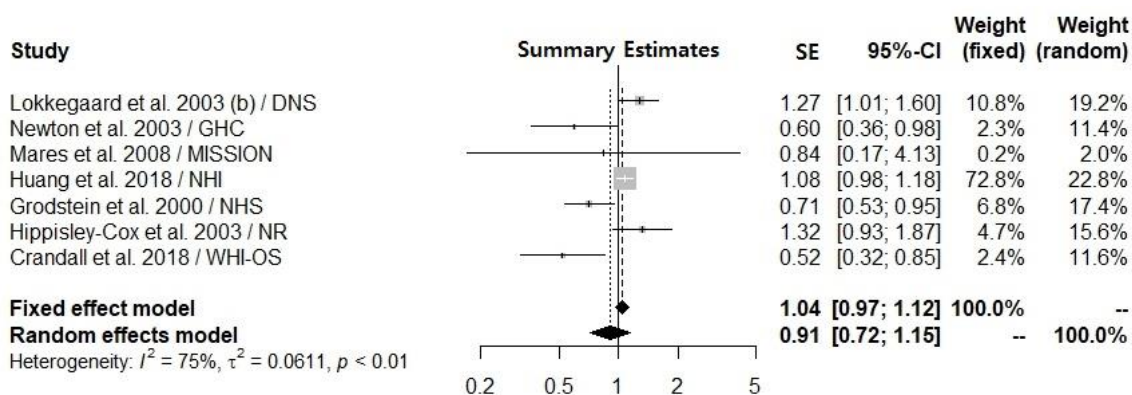

(b)

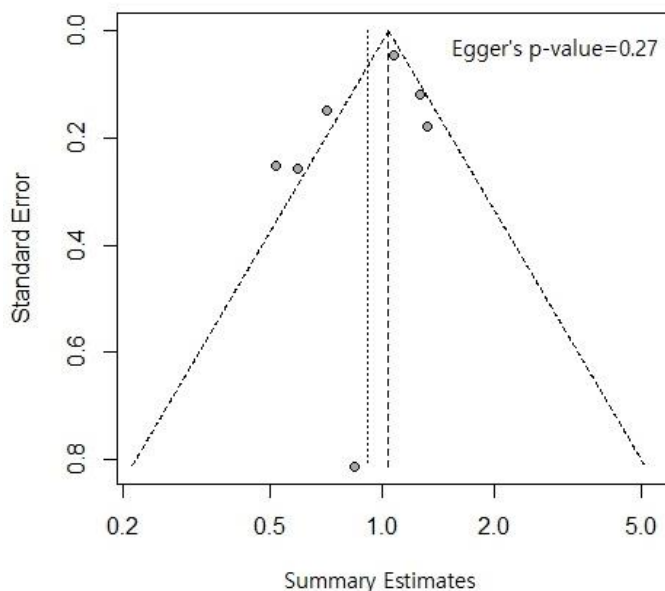

Summary estimates (95% CI) were measured by fixed-effect models if  $I^2$  was  $<30\%$  and  $P$  for heterogeneity was  $>0.05$ ; otherwise, the summary estimates (95% CI) were measured by random-effect models. Forest and funnel plots were generated by "meta" package in R version 3.4.1. CHD, coronary heart disease; MHT, menopausal hormone therapy; SE, summary estimates.

Supplementary Figure S2.8. Pooled results of MHT and angina in the observational studies: (a) forest plot.

(a)

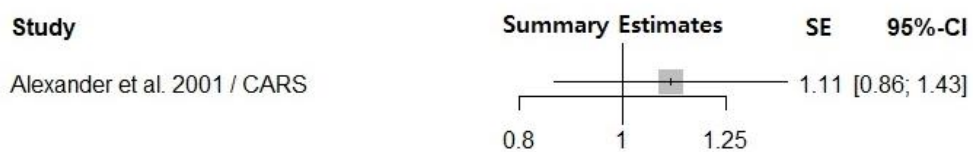

Summary estimates (95% CI) were measured by fixed-effect models if  $I^2$  was  $<30\%$  and  $P$  for heterogeneity was  $>0.05$ ; otherwise, the summary estimates (95% CI) were measured by random-effect models. Forest and funnel plots were generated by "meta" package in R version 3.4.1. CHD, coronary heart disease; MHT, menopausal hormone therapy; SE, summary estimates.

Supplementary Figure S3.1.1. MHT and all-cause death in RCTs: subgroup results by regimen type.

(a) estrogen only

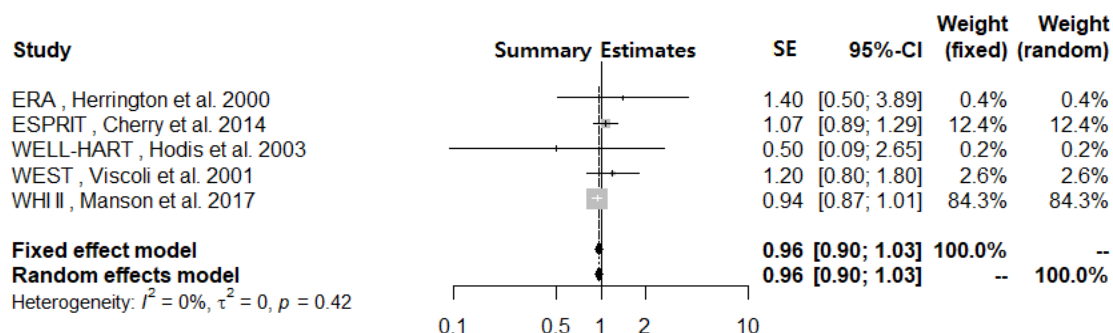

(b) combine EP

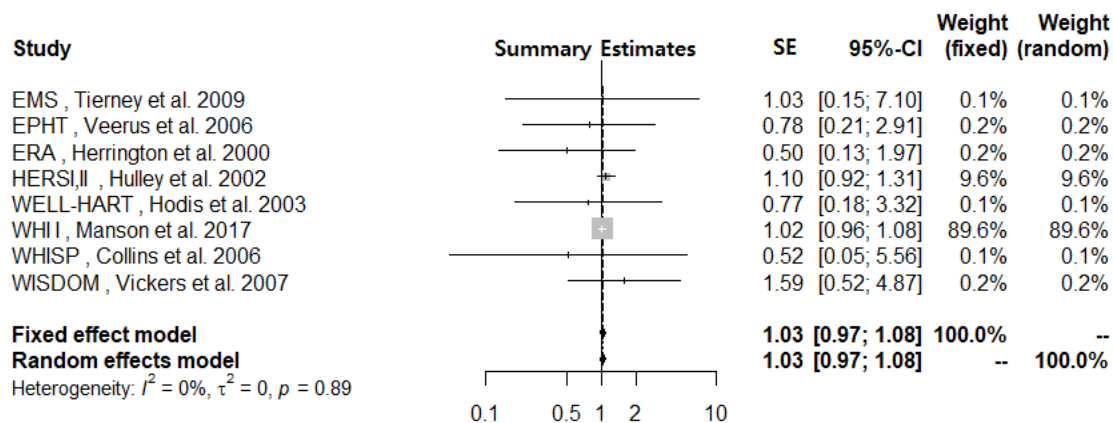

Summary estimates (95% CI) were measured by fixed-effect models if  $I^2$  was  $<30\%$  and  $P$  for heterogeneity was  $>0.05$ ; otherwise, the summary estimates (95% CI) were measured by random-effect models. Forest and funnel plots were generated by "meta" package in R version 3.4.1. MHT, menopausal hormone therapy; RCTs, randomized controlled trials; SE, summary estimates.

Supplementary Figure S3.1.2. MHT and all-cause death in RCTs: subgroup results by duration of use.

(a) duration < 5 years

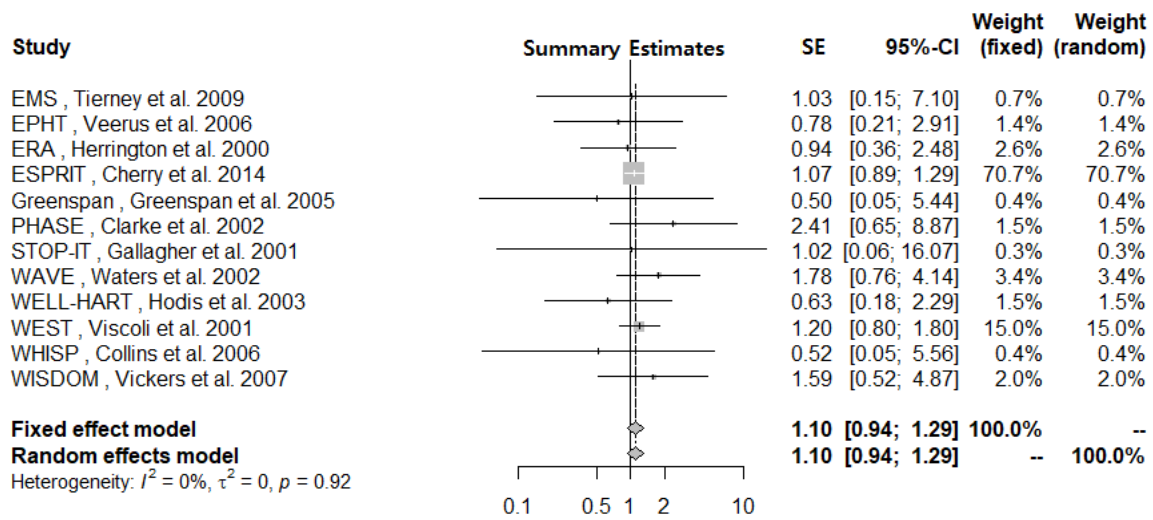

(b) duration ≥ 5 years

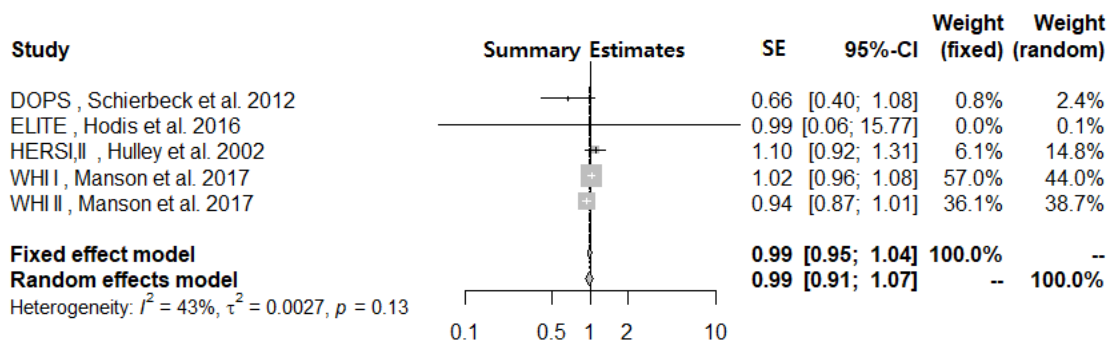

Summary estimates (95% CI) were measured by fixed-effect models if  $I^2$  was <30% and  $P$  for heterogeneity was >0.05; otherwise, the summary estimates (95% CI) were measured by random-effect models. Forest and funnel plots were generated by "meta" package in R version 3.4.1. MHT, menopausal hormone therapy; RCTs, randomized controlled trials; SE, summary estimates.

Supplementary Figure S3.1.3. MHT and all-cause death in RCTs: subgroup results by timing of initiation.

(a) early users

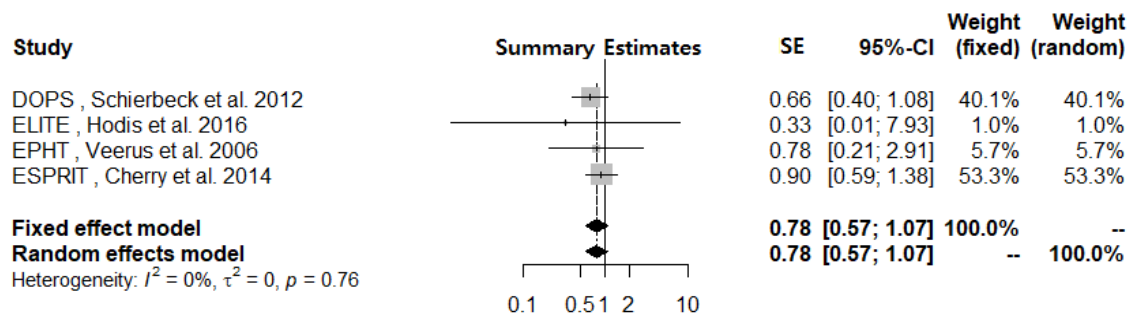

(b) late users

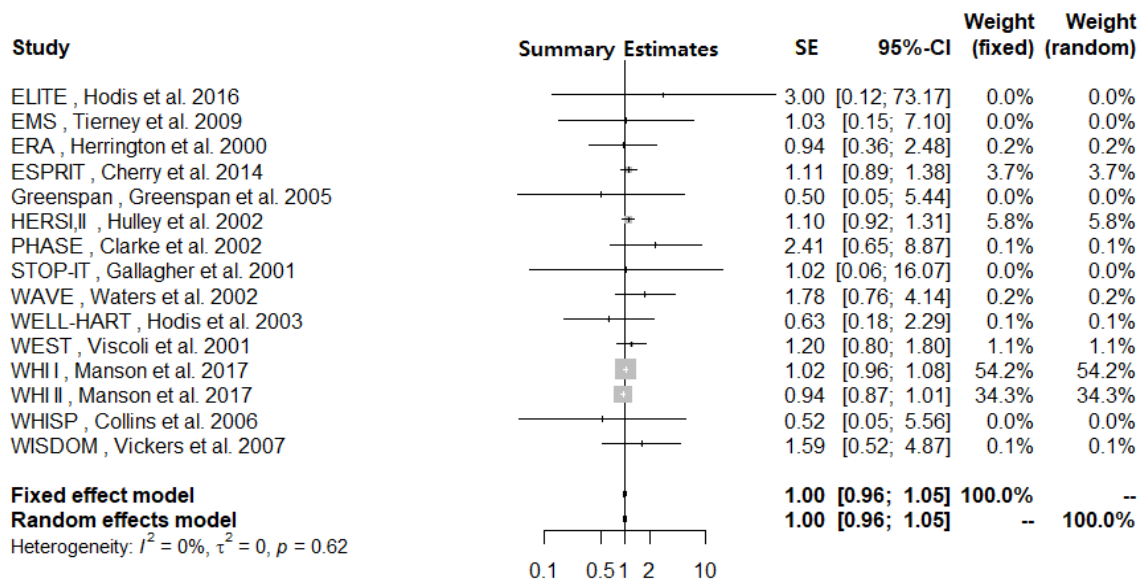

Summary estimates (95% CI) were measured by fixed-effect models if  $I^2$  was  $<30\%$  and  $P$  for heterogeneity was  $>0.05$ ; otherwise, the summary estimates (95% CI) were measured by random-effect models. Forest and funnel plots were generated by "meta" package in R version 3.4.1. MHT, menopausal hormone therapy; RCTs, randomized controlled trials; SE, summary estimates.



Supplementary Figure S3.1.4. MHT and all-cause death in RCTs: subgroup results by underlying disease.

(a) women with diseases

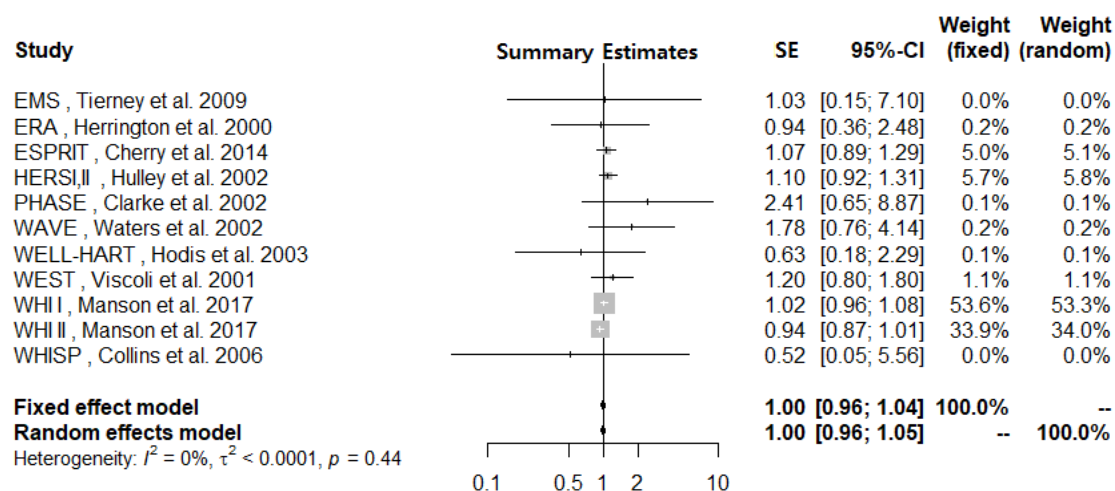

(b) women without diseases (relatively healthy)

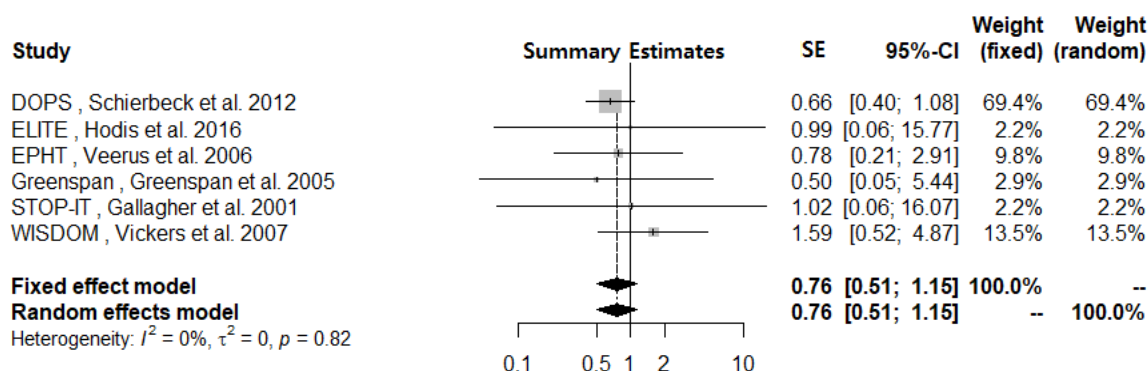

Summary estimates (95% CI) were measured by fixed-effect models if  $I^2$  was  $<30\%$  and  $P$  for heterogeneity was  $>0.05$ ; otherwise, the summary estimates (95% CI) were measured by random-effect models. Forest and funnel plots were generated by "meta" package in R version 3.4.1. MHT, menopausal hormone therapy; RCTs, randomized controlled trials; SE, summary estimates.

Supplementary Figure S3.2.1. MHT and cardiovascular death in RCTs: subgroup results by regimen type.

(a) estrogen only

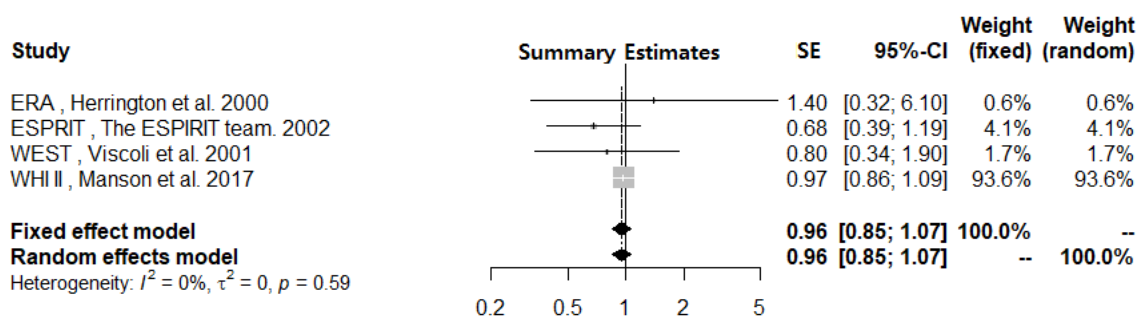

(b) combined EP

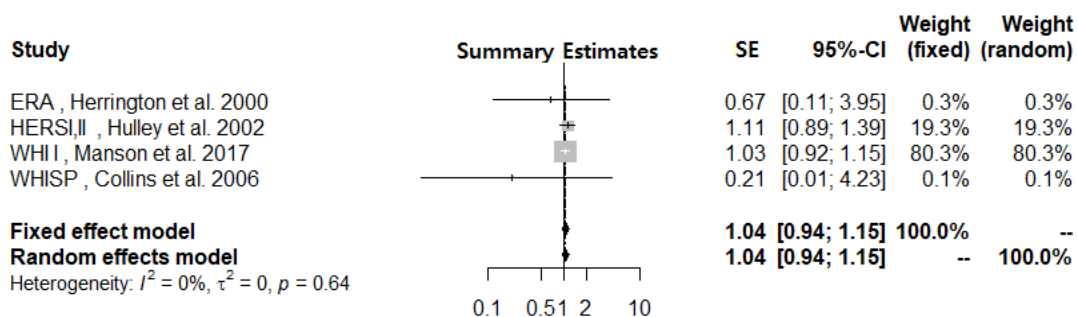

Summary estimates (95% CI) were measured by fixed-effect models if  $I^2$  was  $<30\%$  and  $P$  for heterogeneity was  $>0.05$ ; otherwise, the summary estimates (95% CI) were measured by random-effect models. Forest and funnel plots were generated by "meta" package in R version 3.4.1. MHT, menopausal hormone therapy; RCTs, randomized controlled trials; SE, summary estimates.

Supplementary Figure S3.2.2. MHT and cardiovascular death in RCTs: subgroup results by duration of use.

(a) duration < 5 years

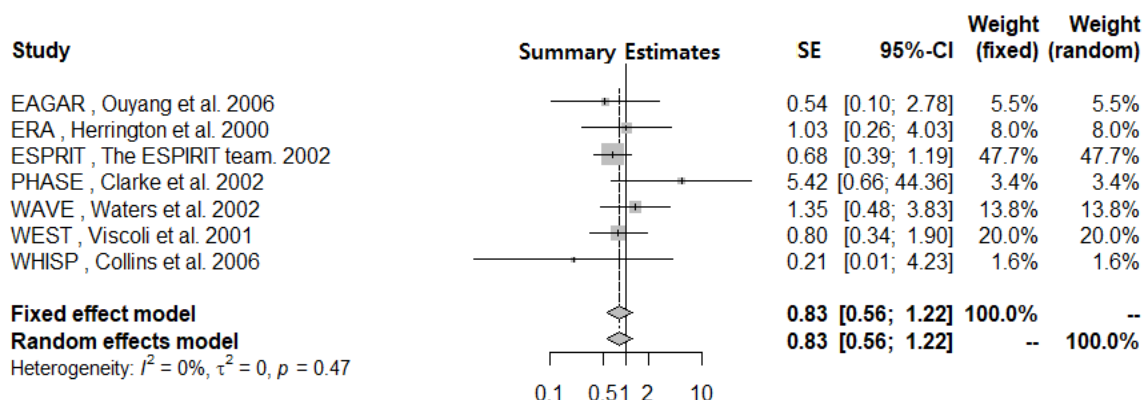

(b) duration ≥ 5 years

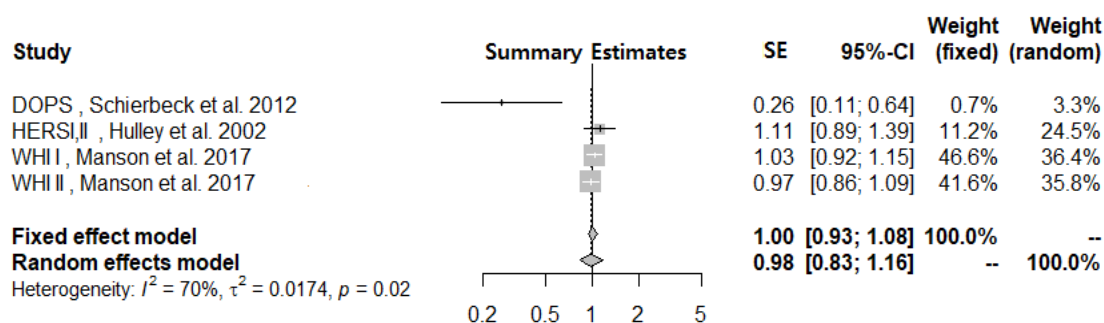

Summary estimates (95% CI) were measured by fixed-effect models if  $I^2$  was <30% and  $P$  for heterogeneity was >0.05; otherwise, the summary estimates (95% CI) were measured by random-effect models. Forest and funnel plots were generated by "meta" package in R version 3.4.1. MHT, menopausal hormone therapy; RCTs, randomized controlled trials; SE, summary estimates.

Supplementary Figure S3.2.3. MHT and cardiovascular death in RCTs: subgroup results by timing of initiation.

(a) early users

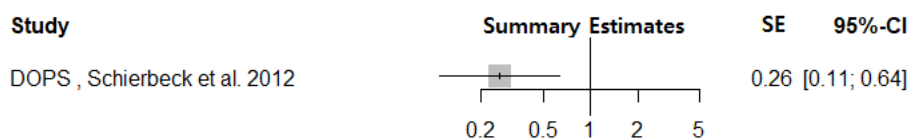

(b) late users

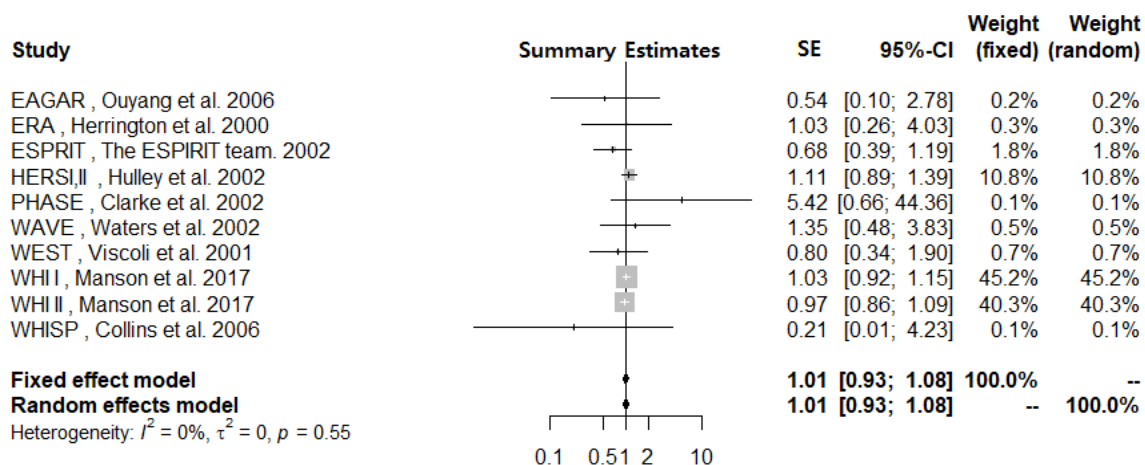

Summary estimates (95% CI) were measured by fixed-effect models if  $I^2$  was  $<30\%$  and  $P$  for heterogeneity was  $>0.05$ ; otherwise, the summary estimates (95% CI) were measured by random-effect models. Forest and funnel plots were generated by "meta" package in R version 3.4.1. MHT, menopausal hormone therapy; RCTs, randomized controlled trials; SE, summary estimates.

Supplementary Figure S3.2.4. MHT and cardiovascular death in RCTs: subgroup results by underlying disease.

(a) women with diseases

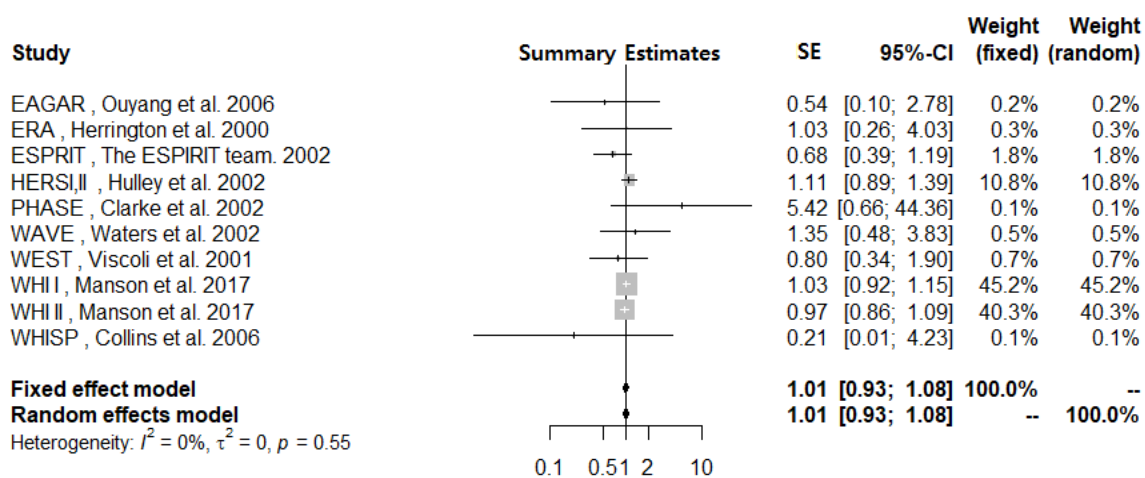

(b) women without diseases (relatively healthy)

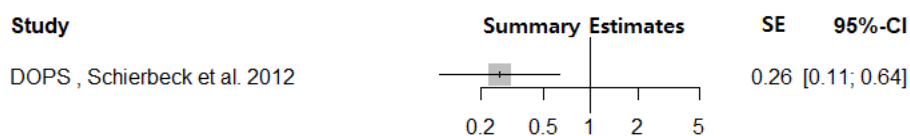

Summary estimates (95% CI) were measured by fixed-effect models if  $I^2$  was  $<30\%$  and  $P$  for heterogeneity was  $>0.05$ ; otherwise, the summary estimates (95% CI) were measured by random-effect models. Forest and funnel plots were generated by "meta" package in R version 3.4.1. MHT, menopausal hormone therapy; RCTs, randomized controlled trials; SE, summary estimates.

Supplementary Figure S3.3.1. MHT and stroke in RCTs: subgroup results by regimen type.

(a) estrogen only

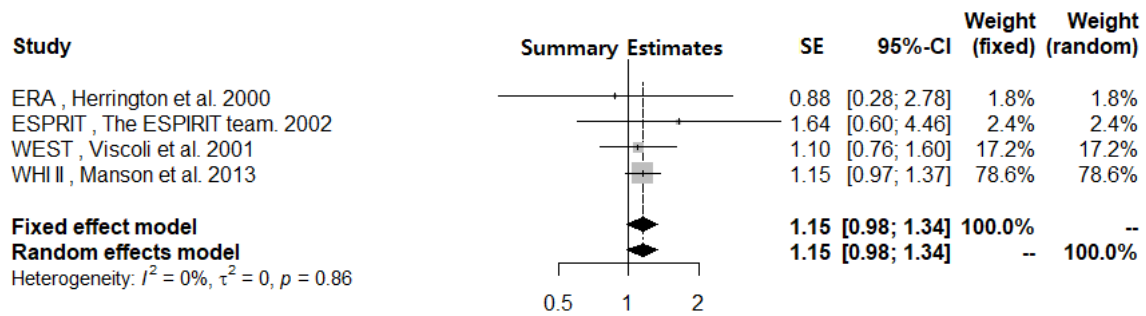

(b) combined EP

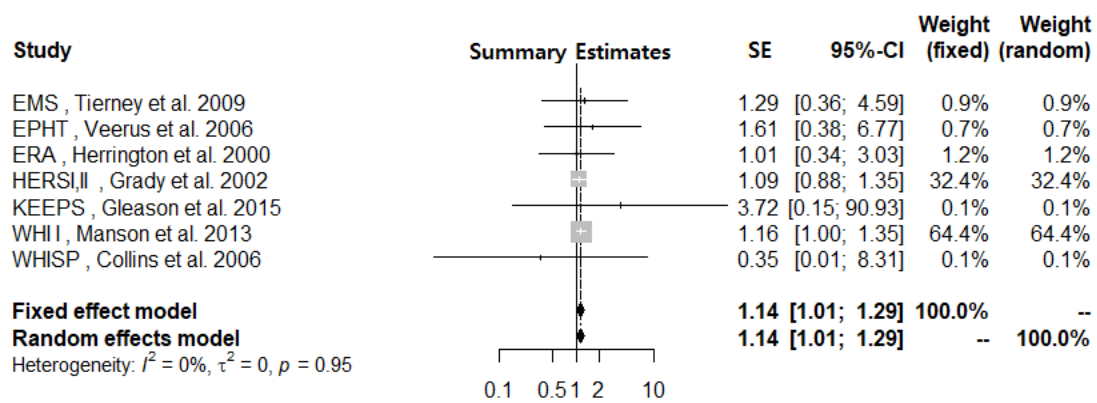

Summary estimates (95% CI) were measured by fixed-effect models if  $I^2$  was  $<30\%$  and  $P$  for heterogeneity was  $>0.05$ ; otherwise, the summary estimates (95% CI) were measured by random-effect models. Forest and funnel plots were generated by "meta" package in R version 3.4.1. MHT, menopausal hormone therapy; RCTs, randomized controlled trials; SE, summary estimates.

Supplementary Figure S3.3.2. MHT and stroke in RCTs: subgroup results by duration of use.

(a) duration < 5 years

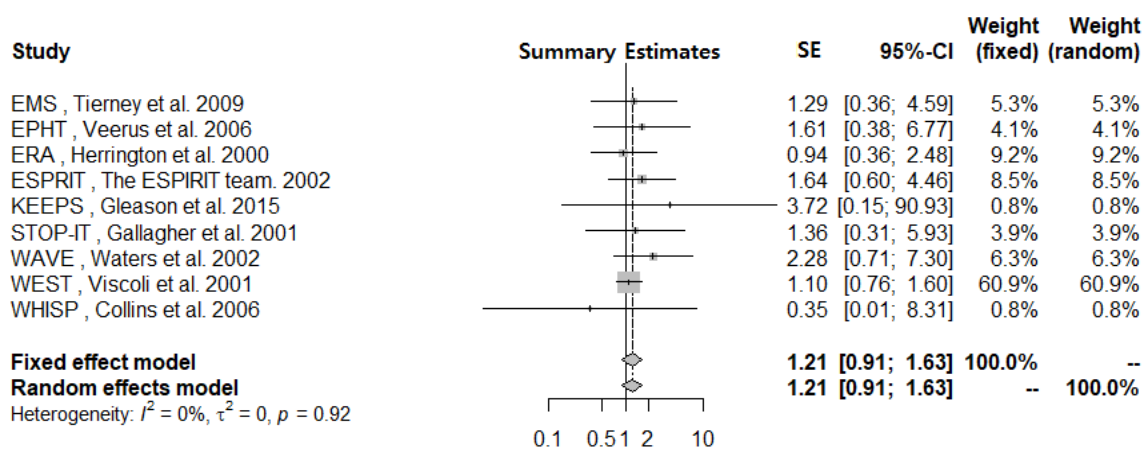

(b) duration  $\geq 5$  years

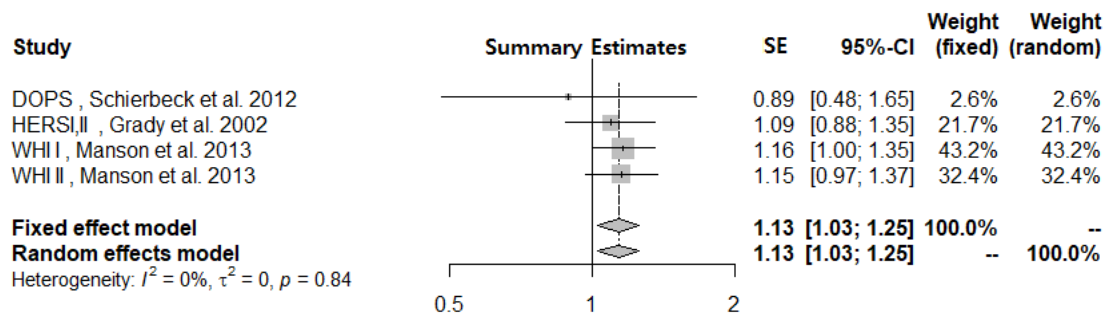

Summary estimates (95% CI) were measured by fixed-effect models if  $I^2$  was <30% and  $P$  for heterogeneity was >0.05; otherwise, the summary estimates (95% CI) were measured by random-effect models. Forest and funnel plots were generated by "meta" package in R version 3.4.1. MHT, menopausal hormone therapy; RCTs, randomized controlled trials; SE, summary estimates.

Supplementary Figure S3.3.3. MHT and stroke in RCTs: subgroup results by timing of initiation.

(a) early users

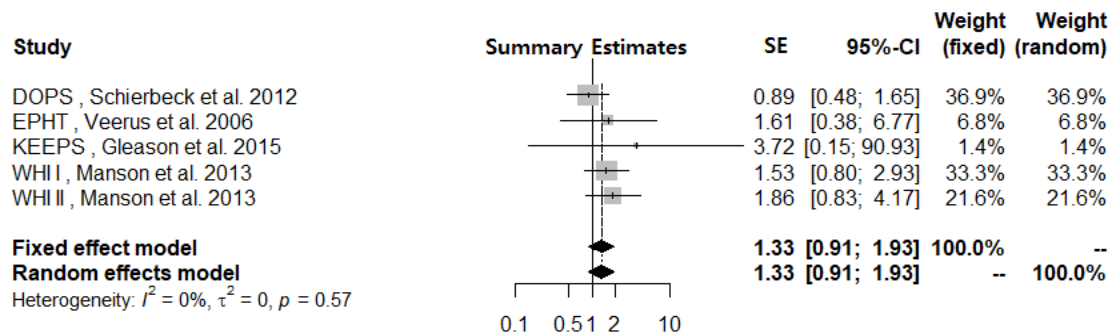

(b) late users

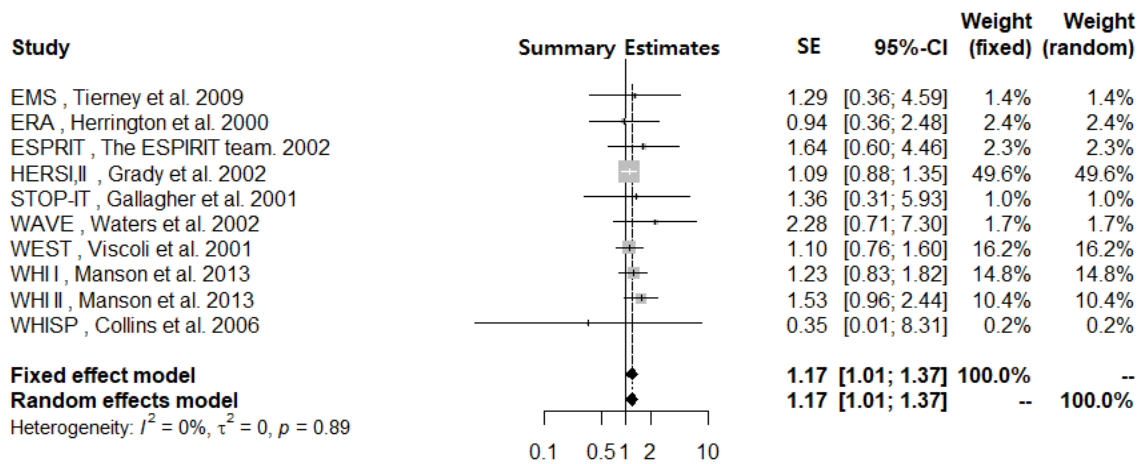

Summary estimates (95% CI) were measured by fixed-effect models if  $I^2$  was  $<30\%$  and  $P$  for heterogeneity was  $>0.05$ ; otherwise, the summary estimates (95% CI) were measured by random-effect models. Forest and funnel plots were generated by "meta" package in R version 3.4.1. MHT, menopausal hormone therapy; RCTs, randomized controlled trials; SE, summary estimates.



Supplementary Figure S3.3.4. MHT and stroke in RCTs: subgroup results by underlying disease.

(a) women with diseases

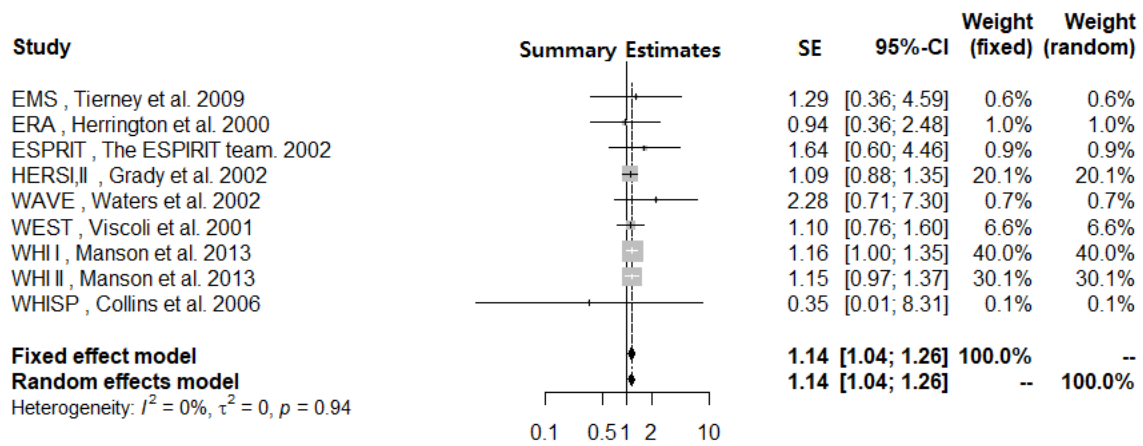

(b) women without diseases (relatively healthy)

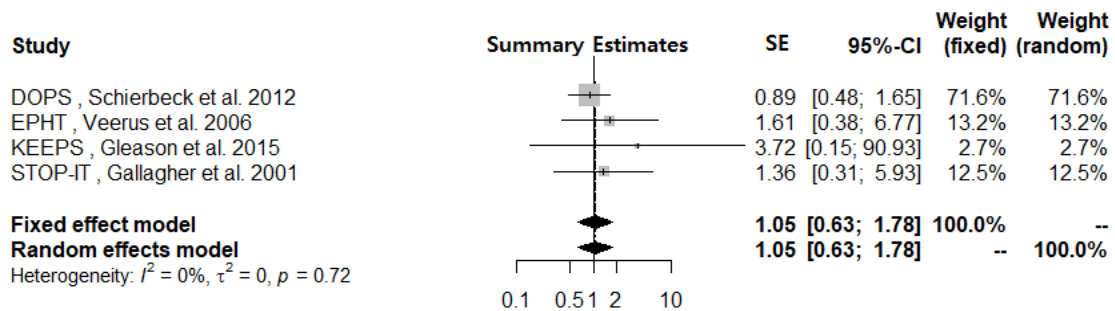

Summary estimates (95% CI) were measured by fixed-effect models if  $I^2$  was  $<30\%$  and  $P$  for heterogeneity was  $>0.05$ ; otherwise, the summary estimates (95% CI) were measured by random-effect models. Forest and funnel plots were generated by "meta" package in R version 3.4.1. MHT, menopausal hormone therapy; RCTs, randomized controlled trials; SE, summary estimates.

Supplementary Figure S3.4.1. MHT and VTE in RCTs: subgroup results by regimen type.

(a) estrogen only

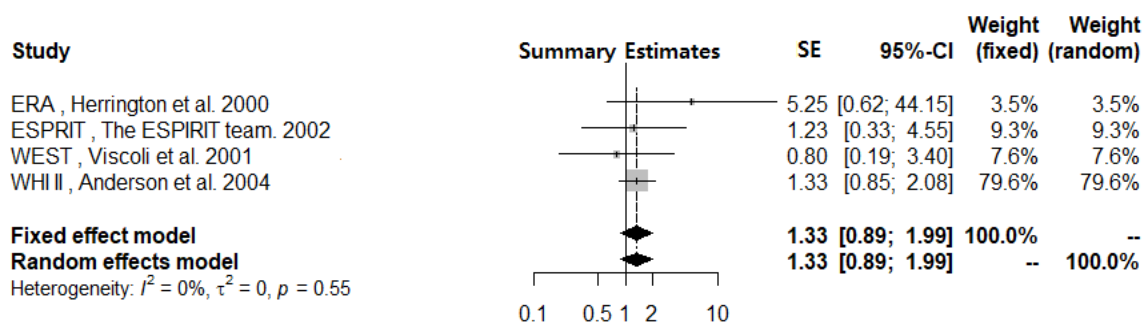

(b) combined EP

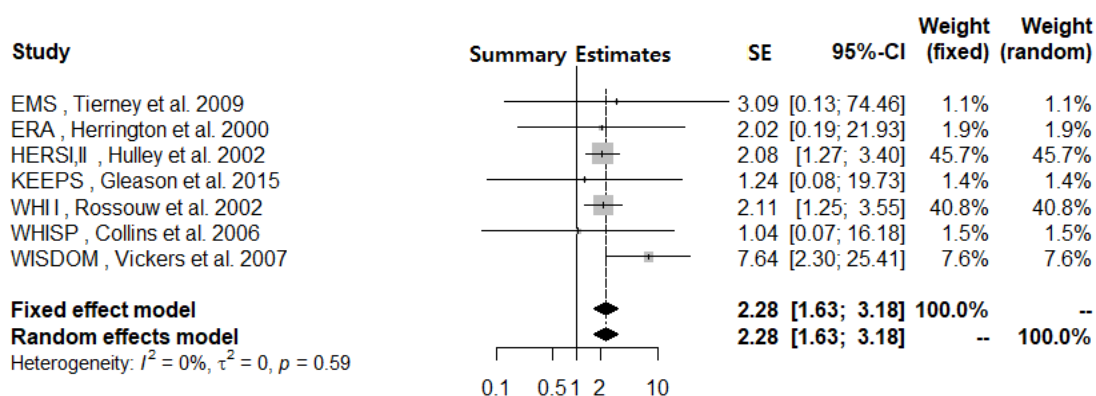

Summary estimates (95% CI) were measured by fixed-effect models if  $I^2$  was  $<30\%$  and  $P$  for heterogeneity was  $>0.05$ ; otherwise, the summary estimates (95% CI) were measured by random-effect models. Forest and funnel plots were generated by "meta" package in R version 3.4.1. MHT, menopausal hormone therapy; RCTs, randomized controlled trials; SE, summary estimates; VTE, venous thromboembolism.

Supplementary Figure S3.4.2. MHT and VTE in RCTs: subgroup results by duration of use.

(a) duration < 5 years

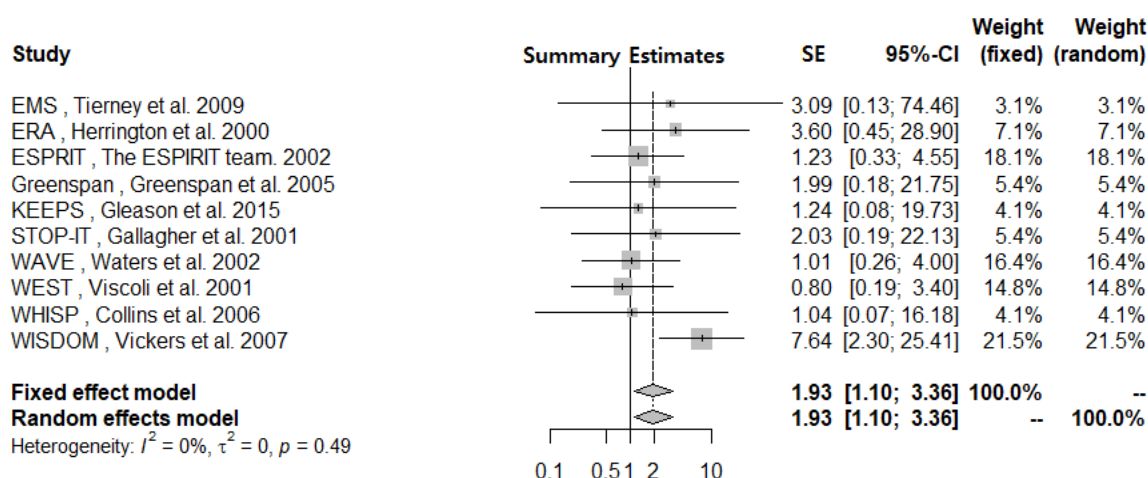

(b) duration ≥ 5 years

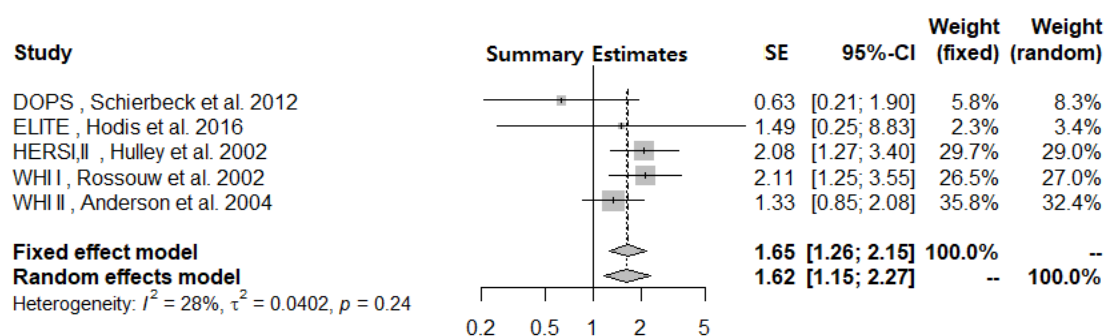

Summary estimates (95% CI) were measured by fixed-effect models if  $I^2$  was <30% and  $P$  for heterogeneity was >0.05; otherwise, the summary estimates (95% CI) were measured by random-effect models. Forest and funnel plots were generated by "meta" package in R version 3.4.1. MHT, menopausal hormone therapy; RCTs, randomized controlled trials; SE, summary estimates; VTE, venous thromboembolism.

Supplementary Figure S3.4.3. MHT and VTE in RCTs: subgroup results by timing of initiation.

(a) early users

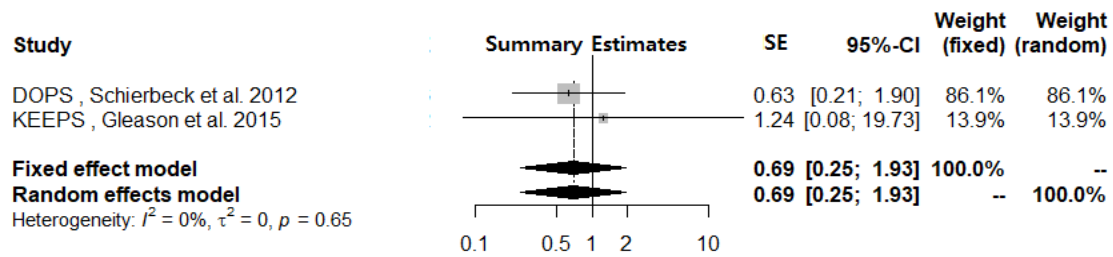

(b) late users

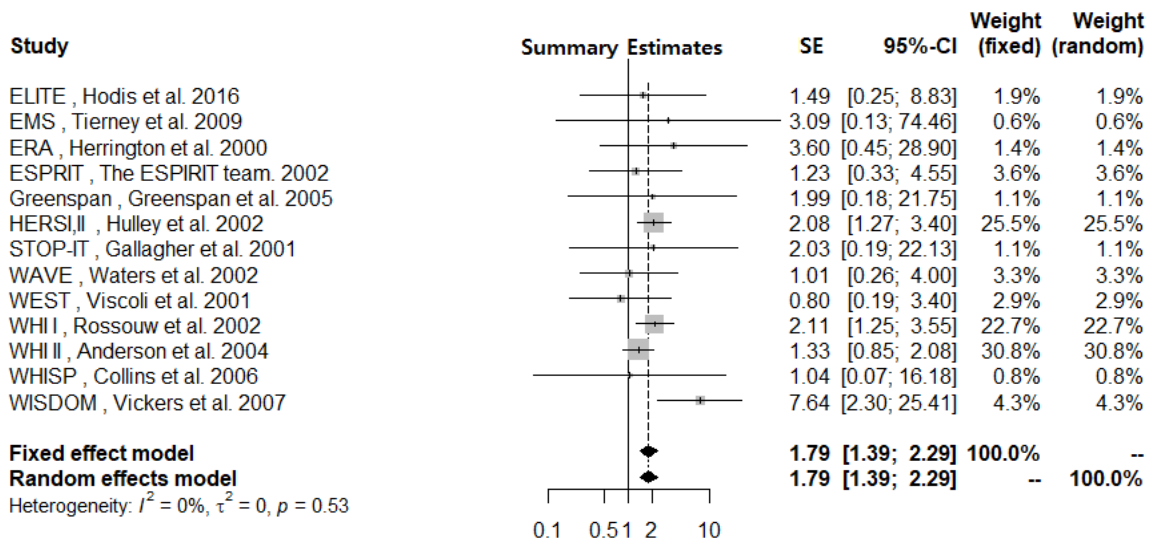

Summary estimates (95% CI) were measured by fixed-effect models if  $I^2$  was  $<30\%$  and  $P$  for heterogeneity was  $>0.05$ ; otherwise, the summary estimates (95% CI) were measured by random-effect models. Forest and funnel plots were generated by "meta" package in R version 3.4.1. MHT, menopausal hormone therapy; RCTs, randomized controlled trials; SE, summary estimates; VTE, venous thromboembolism.

Supplementary Figure S3.4.4. MHT and VTE in RCTs: subgroup results by underlying disease.

(a) women with diseases

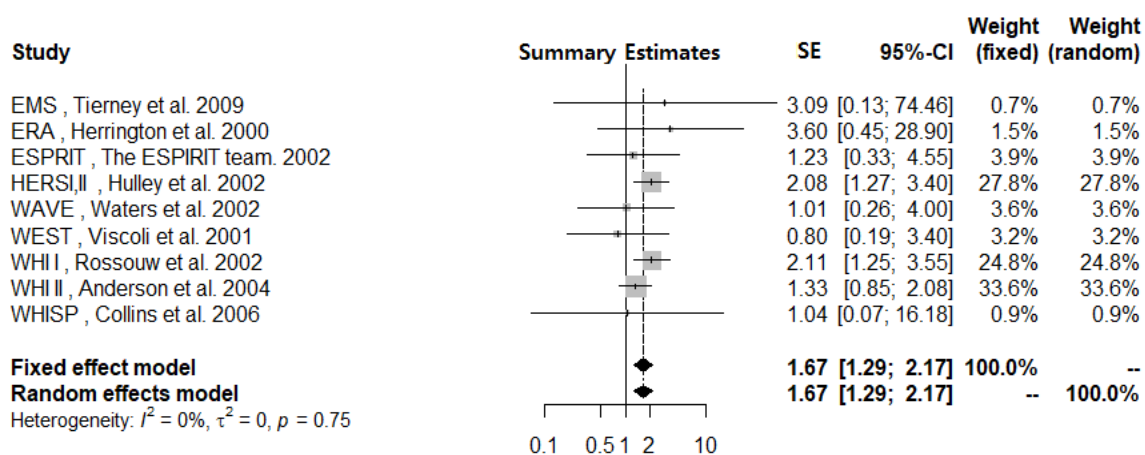

(b) women without diseases (relatively healthy)

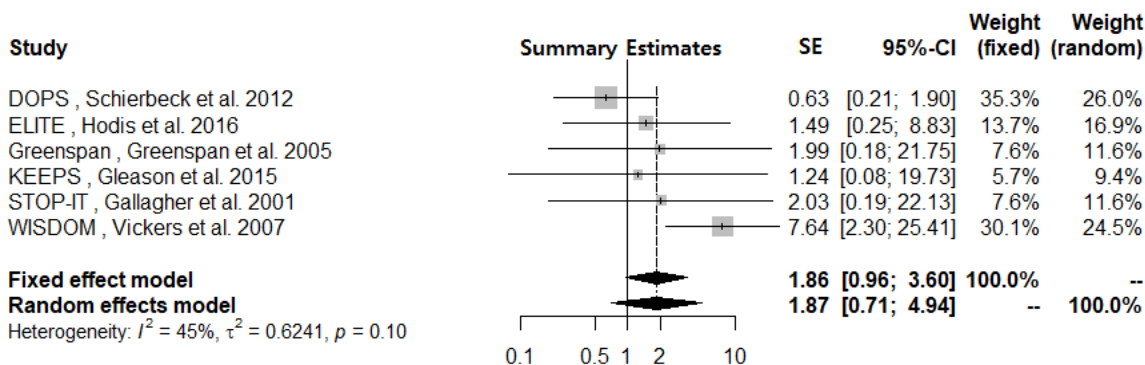

Summary estimates (95% CI) were measured by fixed-effect models if  $I^2$  was  $<30\%$  and  $P$  for heterogeneity was  $>0.05$ ; otherwise, the summary estimates (95% CI) were measured by random-effect models. Forest and funnel plots were generated by "meta" package in R version 3.4.1. MHT, menopausal hormone therapy; RCTs, randomized controlled trials; SE, summary estimates; VTE, venous thromboembolism.

Supplementary Figure S3.5.1. MHT and PE in RCTs: subgroup results by regimen type.

(a) *estrogen only*

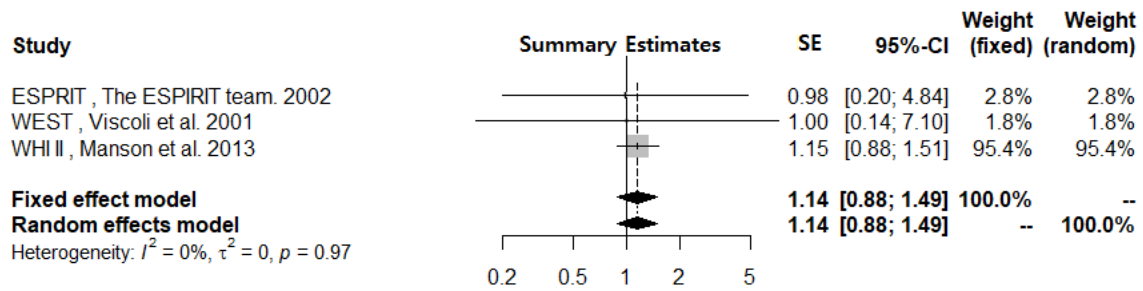

(b) *combined EP*

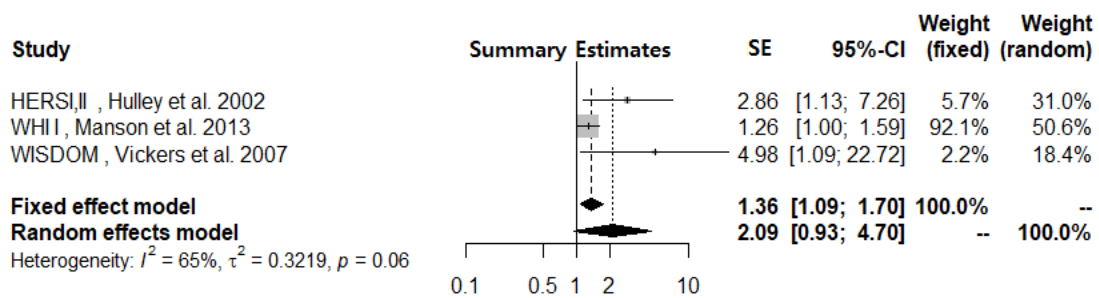

Summary estimates (95% CI) were measured by fixed-effect models if  $I^2$  was  $<30\%$  and  $P$  for heterogeneity was  $>0.05$ ; otherwise, the summary estimates (95% CI) were measured by random-effect models. Forest and funnel plots were generated by "meta" package in R version 3.4.1. MHT, menopausal hormone therapy; PE, pulmonary embolism; RCTs, randomized controlled trials; SE, summary estimates.

Supplementary Figure S3.5.2. MHT and PE in RCTs: subgroup results by duration of use.

(a) duration < 5 years

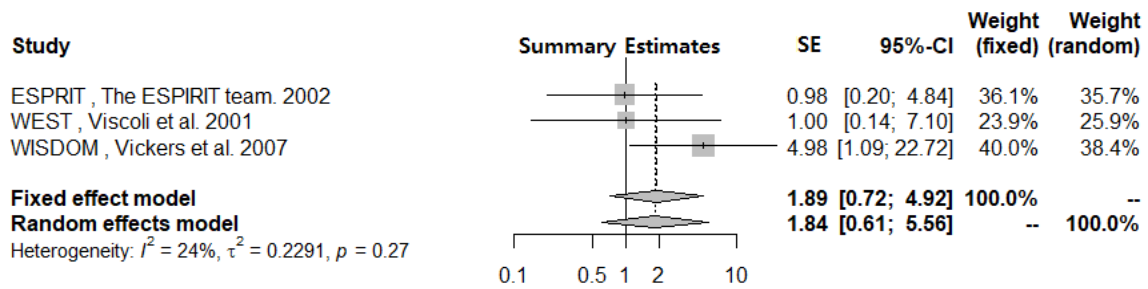

(b) duration ≥ 5 years

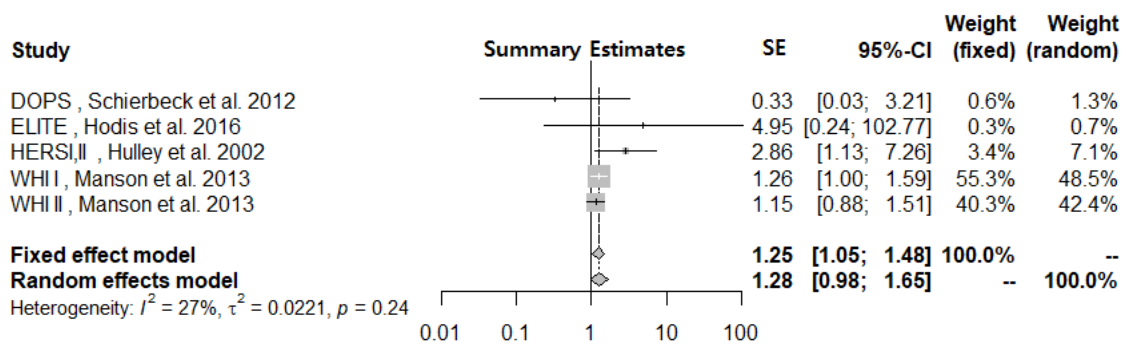

Summary estimates (95% CI) were measured by fixed-effect models if  $I^2$  was <30% and  $P$  for heterogeneity was >0.05; otherwise, the summary estimates (95% CI) were measured by random-effect models. Forest and funnel plots were generated by "meta" package in R version 3.4.1. MHT, menopausal hormone therapy; PE, pulmonary embolism; RCTs, randomized controlled trials; SE, summary estimates.

Supplementary Figure S3.5.3. MHT and PE in RCTs: subgroup results by timing of initiation.

(a) early users

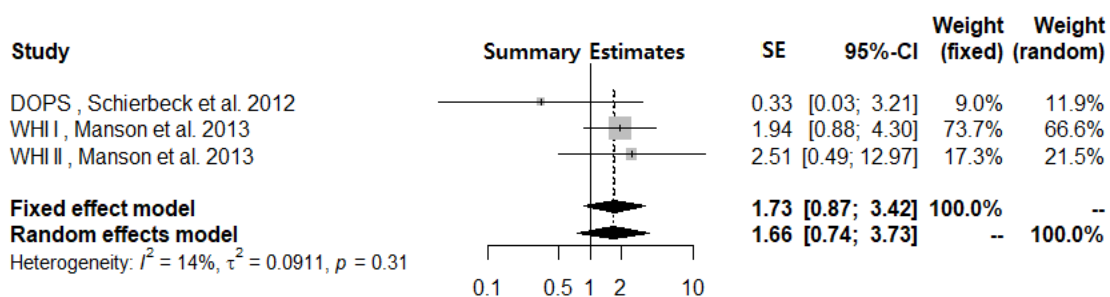

(b) late users

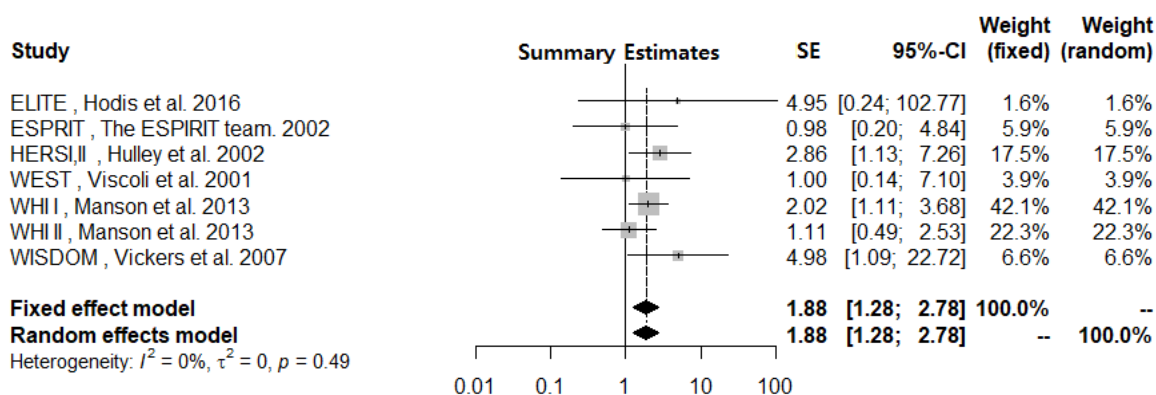

Summary estimates (95% CI) were measured by fixed-effect models if  $I^2$  was  $<30\%$  and  $P$  for heterogeneity was  $>0.05$ ; otherwise, the summary estimates (95% CI) were measured by random-effect models. Forest and funnel plots were generated by "meta" package in R version 3.4.1. MHT, menopausal hormone therapy; PE, pulmonary embolism; RCTs, randomized controlled trials; SE, summary estimates.



Supplementary Figure S3.5.4. MHT and PE in RCTs: subgroup results by underlying disease.

(a) women with diseases

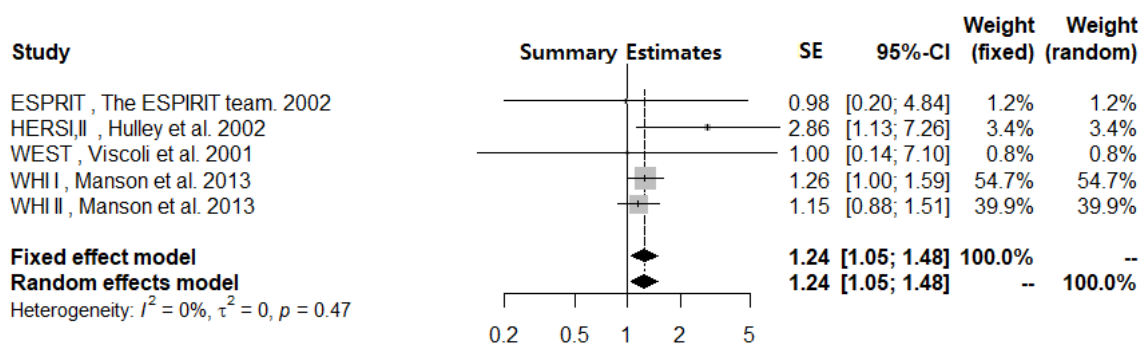

(b) women without diseases (relatively healthy)

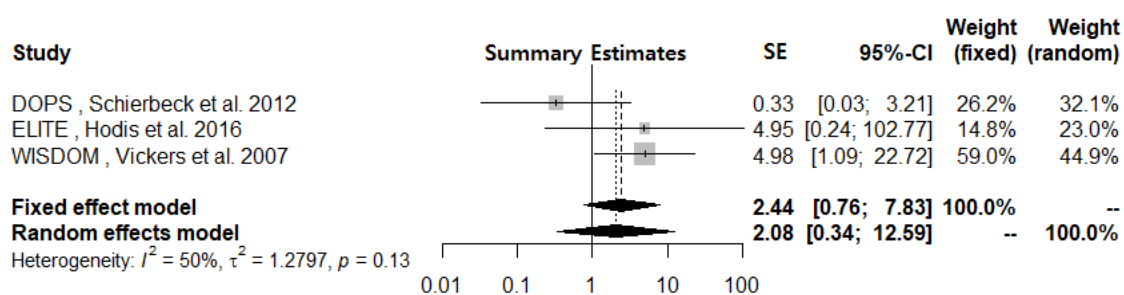

Summary estimates (95% CI) were measured by fixed-effect models if  $I^2$  was  $<30\%$  and  $P$  for heterogeneity was  $>0.05$ ; otherwise, the summary estimates (95% CI) were measured by random-effect models. Forest and funnel plots were generated by "meta" package in R version 3.4.1. MHT, menopausal hormone therapy; PE, pulmonary embolism; RCTs, randomized controlled trials; SE, summary estimates.

Supplementary Figure S3.6.1. MHT and MI in RCTs: subgroup results by regimen type.

(a) estrogen only

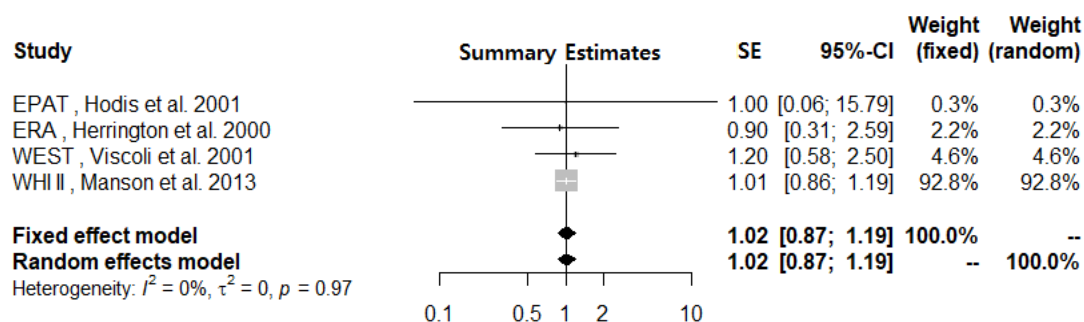

(b) combined EP

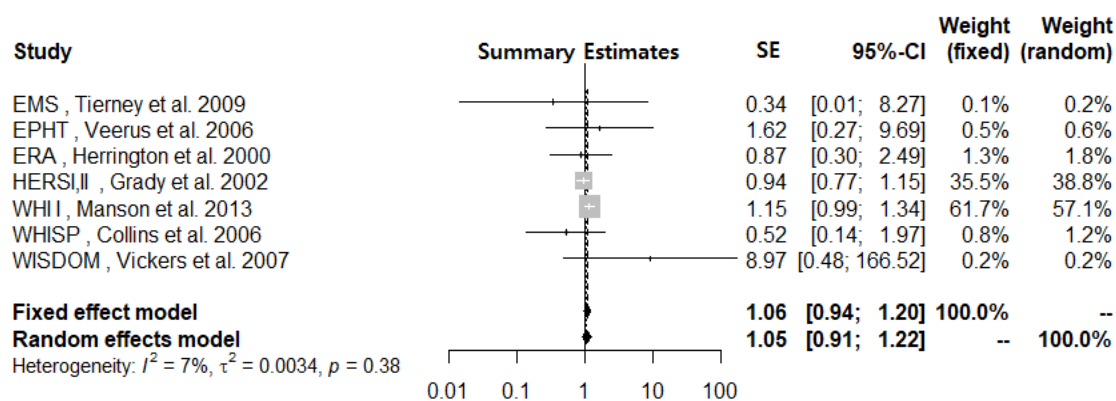

Summary estimates (95% CI) were measured by fixed-effect models if  $I^2$  was  $<30\%$  and  $P$  for heterogeneity was  $>0.05$ ; otherwise, the summary estimates (95% CI) were measured by random-effect models. Forest and funnel plots were generated by "meta" package in R version 3.4.1. MHT, menopausal hormone therapy; PE, pulmonary embolism; RCTs, randomized controlled trials; SE, summary estimates.

Supplementary Figure S3.6.2. MHT and MI in RCTs: subgroup results by duration of use.

(a) duration < 5 years

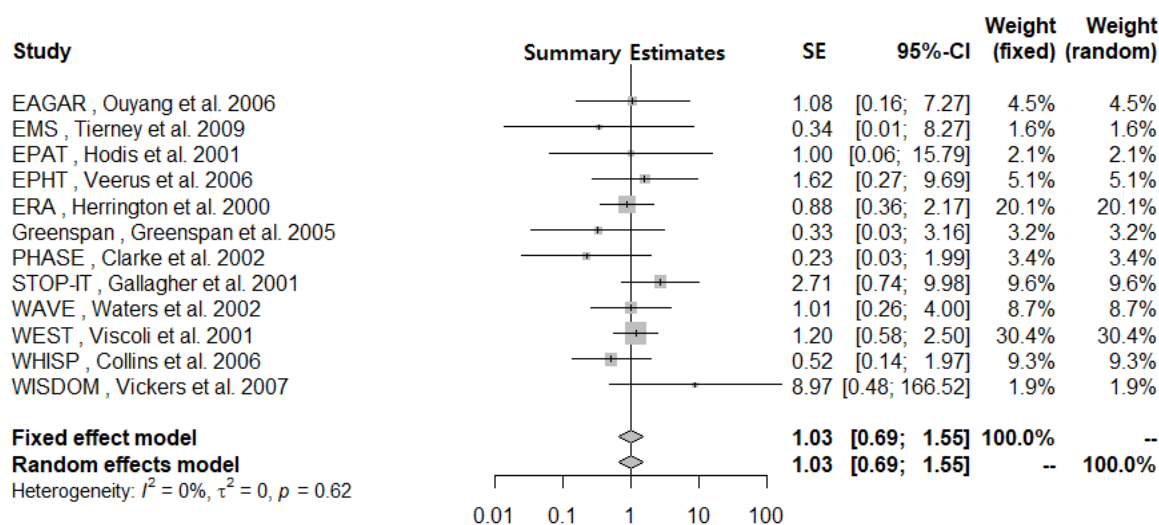

(b) duration ≥ 5 years

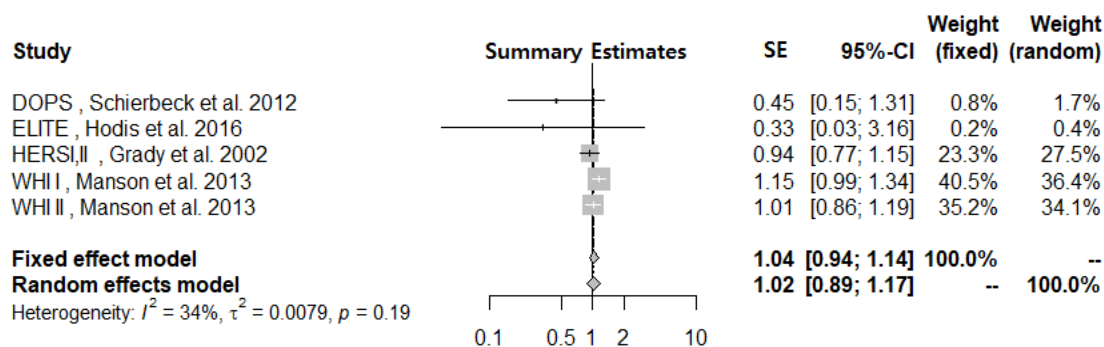

Summary estimates (95% CI) were measured by fixed-effect models if  $I^2$  was <30% and  $P$  for heterogeneity was >0.05; otherwise, the summary estimates (95% CI) were measured by random-effect models. Forest and funnel plots were generated by "meta" package in R version 3.4.1. MHT, menopausal hormone therapy; MI, myocardial infarction; RCTs, randomized controlled trials; SE, summary estimates.

Supplementary Figure S3.6.3. MHT and MI in RCTs: subgroup results by timing of initiation.

(a) early users

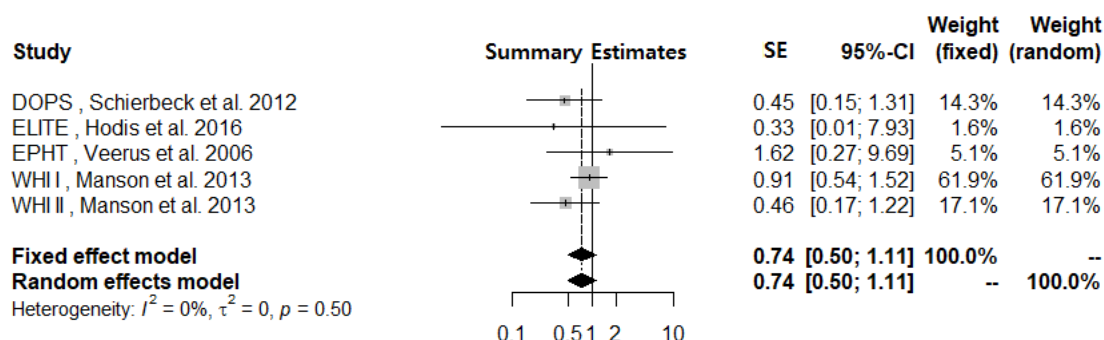

(b) late users

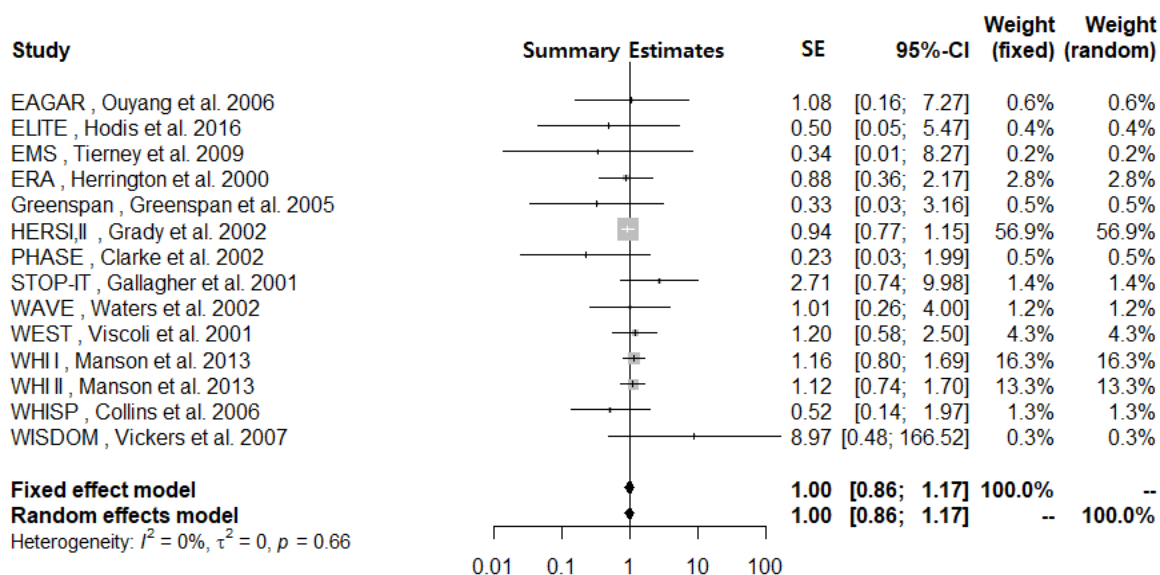

Summary estimates (95% CI) were measured by fixed-effect models if  $I^2$  was  $<30\%$  and  $P$  for heterogeneity was  $>0.05$ ; otherwise, the summary estimates (95% CI) were measured by random-effect models. Forest and funnel plots were generated by "meta" package in R version 3.4.1. MHT, menopausal hormone therapy; MI, myocardial infarction; RCTs, randomized controlled trials; SE, summary estimates.

Supplementary Figure S3.6.4. MHT and MI in RCTs: subgroup results by underlying disease.

(a) women with diseases

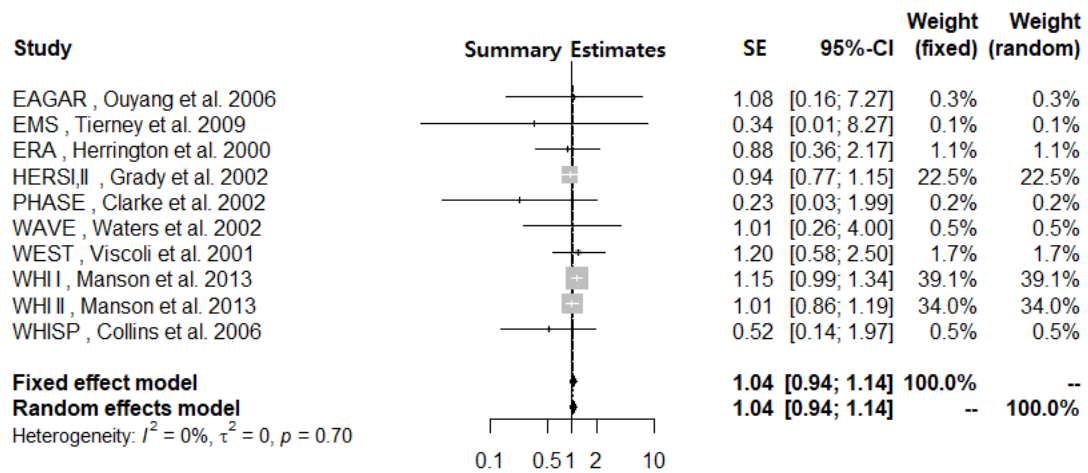

(b) women without diseases (relatively healthy)

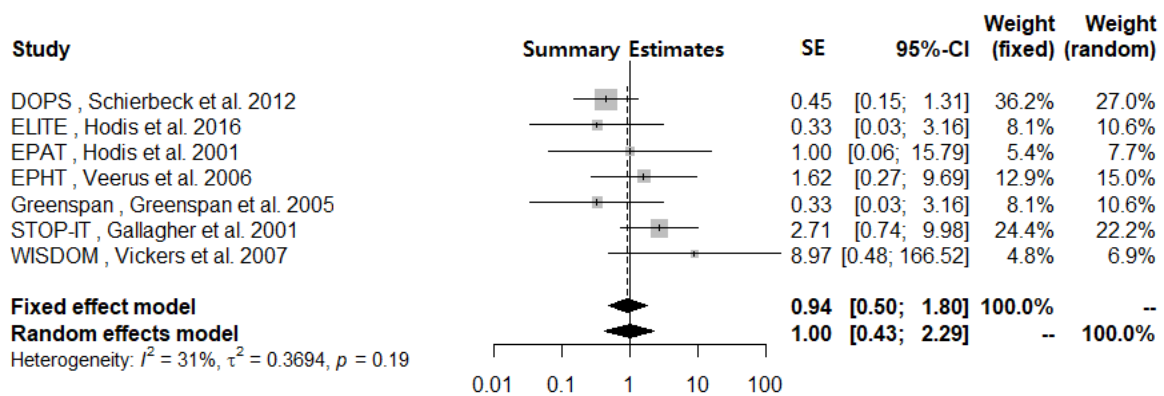

Summary estimates (95% CI) were measured by fixed-effect models if  $I^2$  was  $<30\%$  and  $P$  for heterogeneity was  $>0.05$ ; otherwise, the summary estimates (95% CI) were measured by random-effect models. Forest and funnel plots were generated by "meta" package in R version 3.4.1. MHT, menopausal hormone therapy; MI, myocardial infarction; RCTs, randomized controlled trials; SE, summary estimates.

Supplementary Figure S3.7.1. MHT and CHD in RCTs: subgroup results by regimen type.

(a) estrogen only

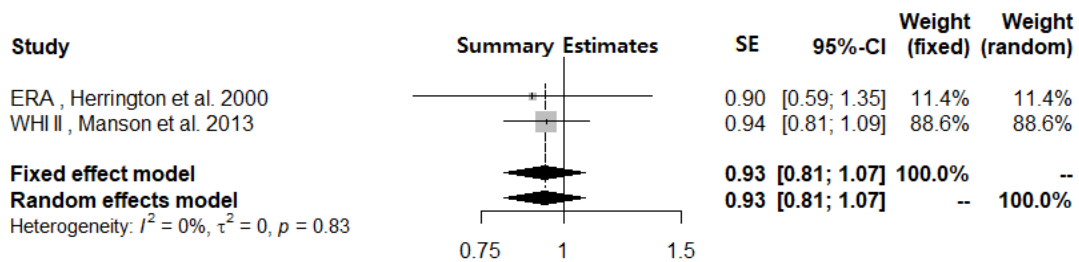

(b) combined EP

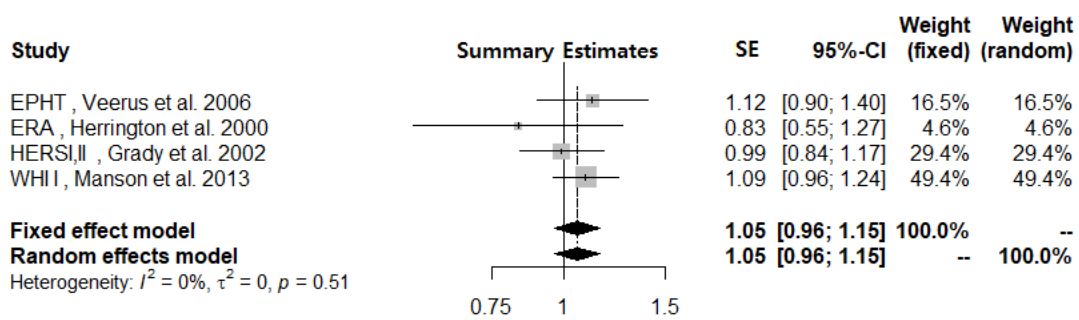

Summary estimates (95% CI) were measured by fixed-effect models if  $I^2$  was  $<30\%$  and  $P$  for heterogeneity was  $>0.05$ ; otherwise, the summary estimates (95% CI) were measured by random-effect models. Forest and funnel plots were generated by "meta" package in R version 3.4.1. CHD, coronary heart disease; MHT, menopausal hormone therapy; RCTs, randomized controlled trials; SE, summary estimates.

Supplementary Figure S3.7.2. MHT and CHD in RCTs: subgroup results by duration of use.

(a) duration < 5 years

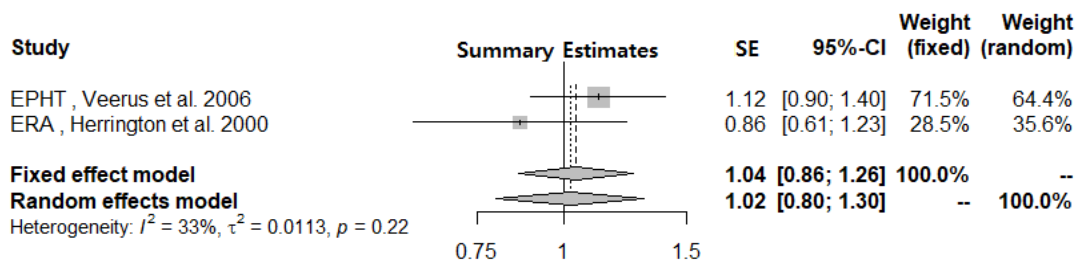

(b) duration  $\geq 5$  years

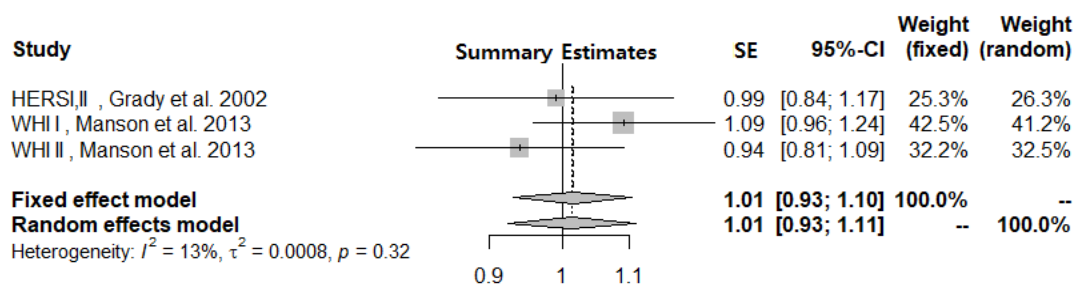

Summary estimates (95% CI) were measured by fixed-effect models if  $I^2$  was <30% and  $P$  for heterogeneity was >0.05; otherwise, the summary estimates (95% CI) were measured by random-effect models. Forest and funnel plots were generated by "meta" package in R version 3.4.1. CHD, coronary heart disease; MHT, menopausal hormone therapy; RCTs, randomized controlled trials; SE, summary estimates.

Supplementary Figure S3.7.3. MHT and CHD in RCTs: subgroup results by timing of initiation.

(a) early users

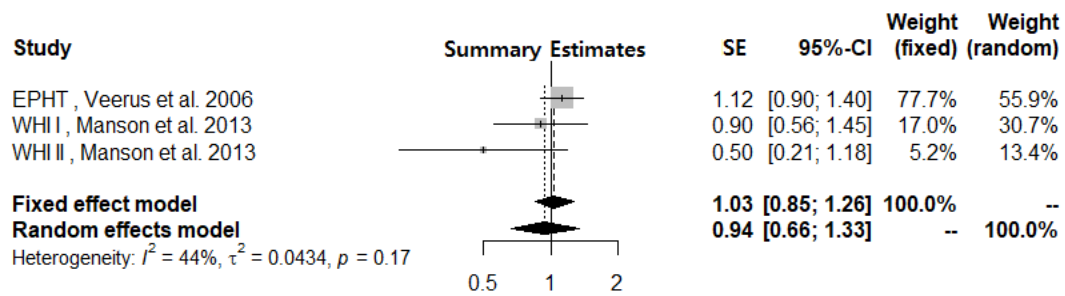

(b) late users

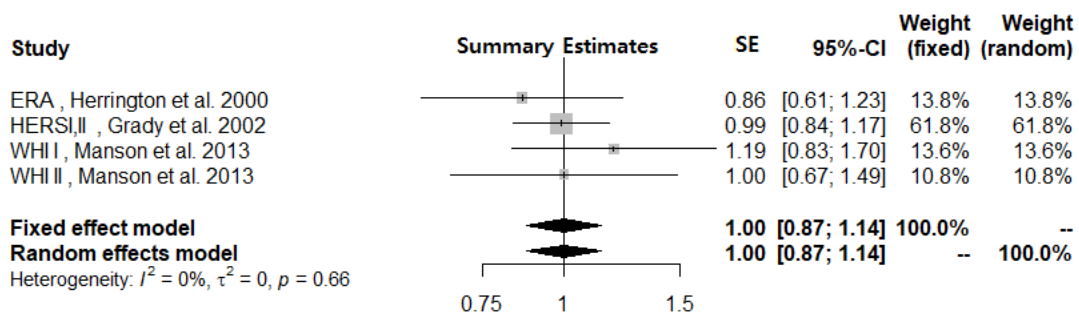

Summary estimates (95% CI) were measured by fixed-effect models if  $I^2$  was  $<30%$  and  $P$  for heterogeneity was  $>0.05$ ; otherwise, the summary estimates (95% CI) were measured by random-effect models. Forest and funnel plots were generated by "meta" package in R version 3.4.1. CHD, coronary heart disease; MHT, menopausal hormone therapy; RCTs, randomized controlled trials; SE, summary estimates.



Supplementary Figure S3.7.4. MHT and CHD in RCTs: subgroup results by underlying disease.

(a) women with diseases

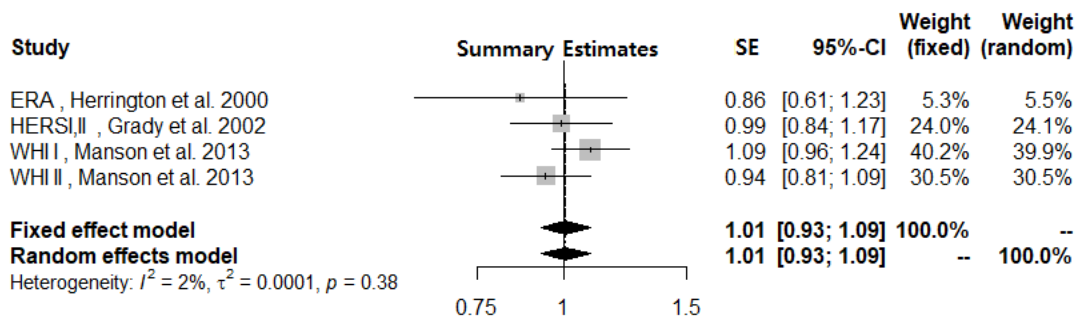

(b) women without diseases (relatively healthy)

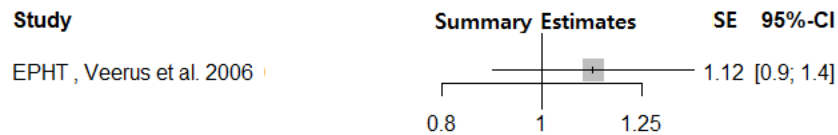

Summary estimates (95% CI) were measured by fixed-effect models if  $I^2$  was  $<30\%$  and  $P$  for heterogeneity was  $>0.05$ ; otherwise, the summary estimates (95% CI) were measured by random-effect models. Forest and funnel plots were generated by "meta" package in R version 3.4.1. CHD, coronary heart disease; MHT, menopausal hormone therapy; RCTs, randomized controlled trials; SE, summary estimates.

Supplementary Figure S3.8.1. MHT and angina in RCTs: subgroup results by regimen type.

(a) estrogen only

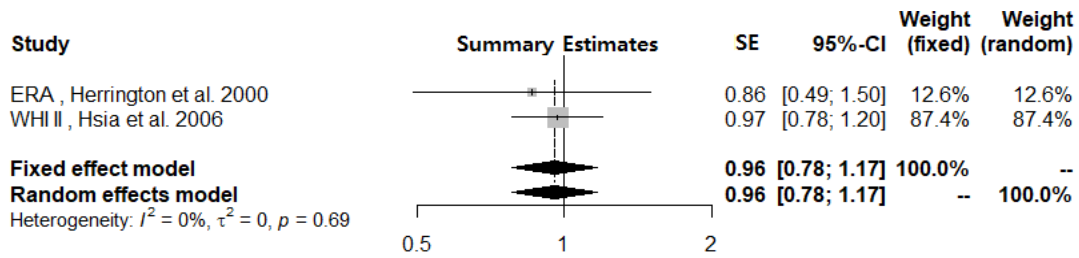

(b) combined EP

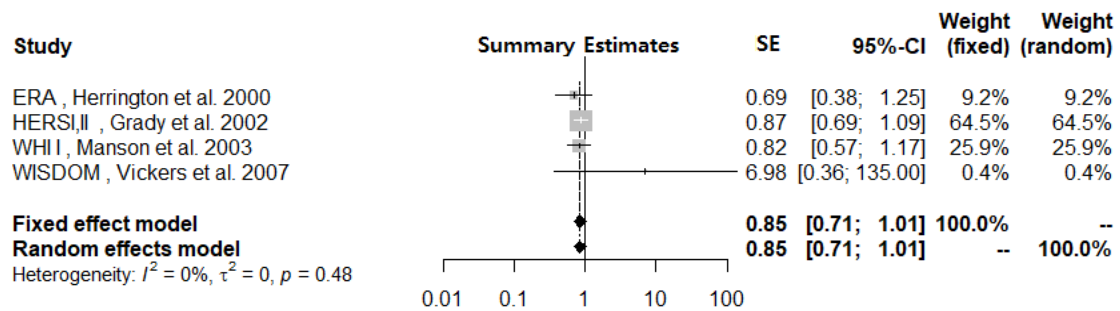

Summary estimates (95% CI) were measured by fixed-effect models if  $I^2$  was  $<30\%$  and  $P$  for heterogeneity was  $>0.05$ ; otherwise, the summary estimates (95% CI) were measured by random-effect models. Forest and funnel plots were generated by "meta" package in R version 3.4.1. MHT, menopausal hormone therapy; RCTs, randomized controlled trials; SE, summary estimates.

Supplementary Figure S3.8.2. MHT and angina in RCTs: subgroup results by duration of use.

(a) duration < 5 years

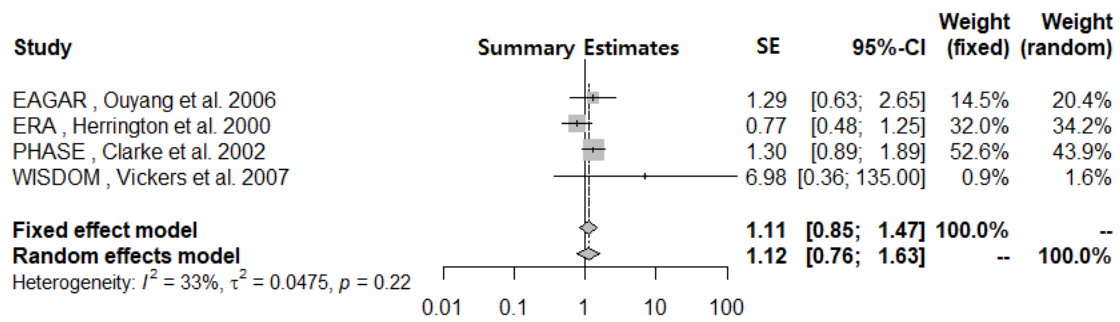

(b) duration ≥ 5 years

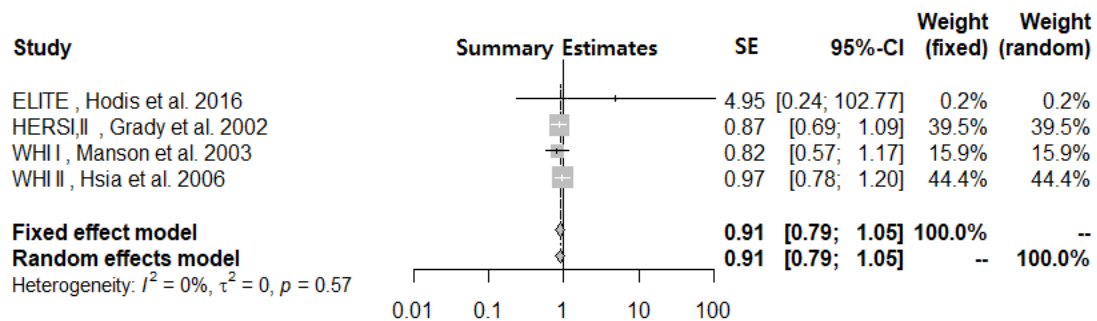

Summary estimates (95% CI) were measured by fixed-effect models if  $I^2$  was <30% and  $P$  for heterogeneity was >0.05; otherwise, the summary estimates (95% CI) were measured by random-effect models. Forest and funnel plots were generated by "meta" package in R version 3.4.1. MHT, menopausal hormone therapy; RCTs, randomized controlled trials; SE, summary estimates.

Supplementary Figure S3.8.3. MHT and angina in RCTs: subgroup results by timing of initiation.

(a) early users

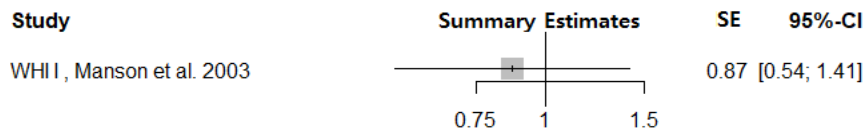

(b) late users

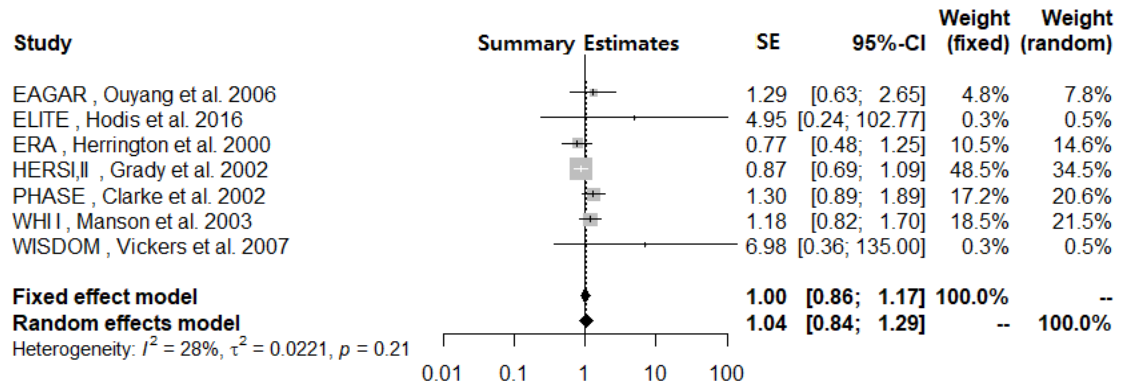

Summary estimates (95% CI) were measured by fixed-effect models if  $I^2$  was  $<30\%$  and  $P$  for heterogeneity was  $>0.05$ ; otherwise, the summary estimates (95% CI) were measured by random-effect models. Forest and funnel plots were generated by "meta" package in R version 3.4.1. MHT, menopausal hormone therapy; RCTs, randomized controlled trials; SE, summary estimates.

Supplementary Figure S3.8.4. MHT and angina in RCTs: subgroup results by underlying disease.

(a) women with diseases

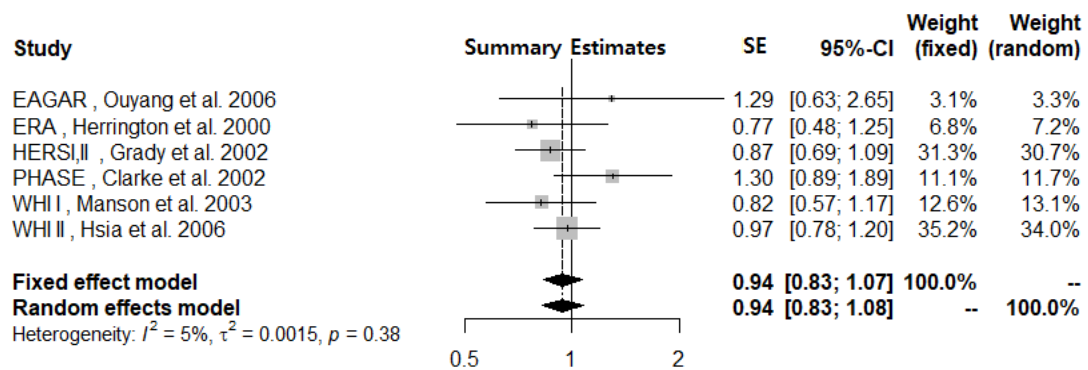

(b) women without diseases (relatively healthy)

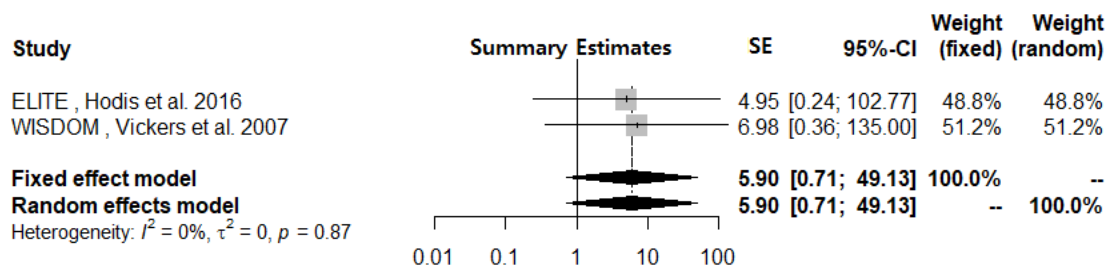

Summary estimates (95% CI) were measured by fixed-effect models if  $I^2$  was  $<30\%$  and  $P$  for heterogeneity was  $>0.05$ ; otherwise, the summary estimates (95% CI) were measured by random-effect models. Forest and funnel plots were generated by "meta" package in R version 3.4.1. MHT, menopausal hormone therapy; RCTs, randomized controlled trials; SE, summary estimates.

Supplementary Figure S3.9.1. MHT and revascularization in RCTs: subgroup results by regimen type.

(a) estrogen only

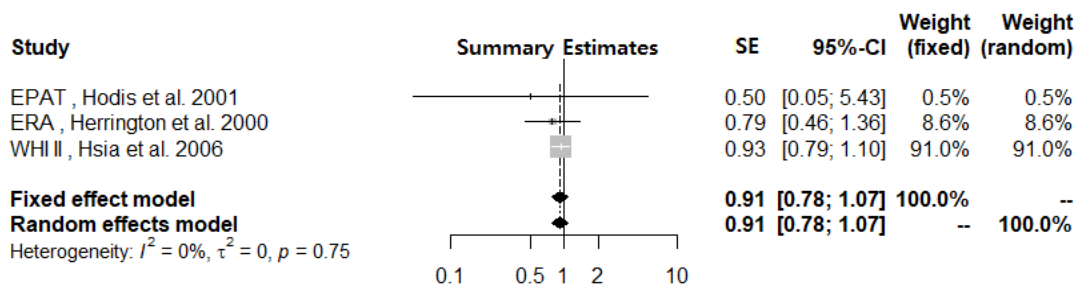

(b) combined EP

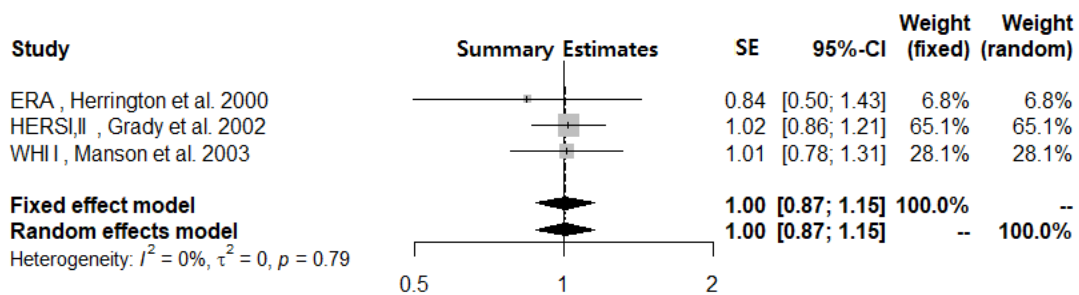

Summary estimates (95% CI) were measured by fixed-effect models if  $I^2$  was  $<30\%$  and  $P$  for heterogeneity was  $>0.05$ ; otherwise, the summary estimates (95% CI) were measured by random-effect models. Forest and funnel plots were generated by "meta" package in R version 3.4.1. MHT, menopausal hormone therapy; RCTs, randomized controlled trials; SE, summary estimates.

Supplementary Figure S3.9.2. MHT and revascularization in RCTs: subgroup results by duration of use.

(a) duration < 5 years

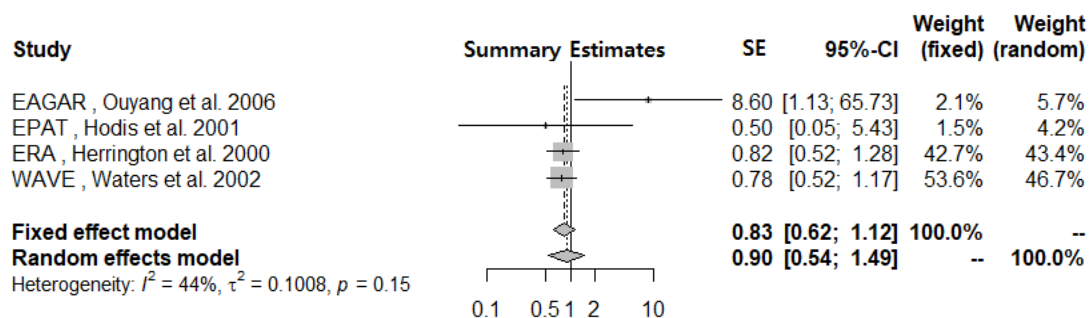

(b) duration ≥ 5 years

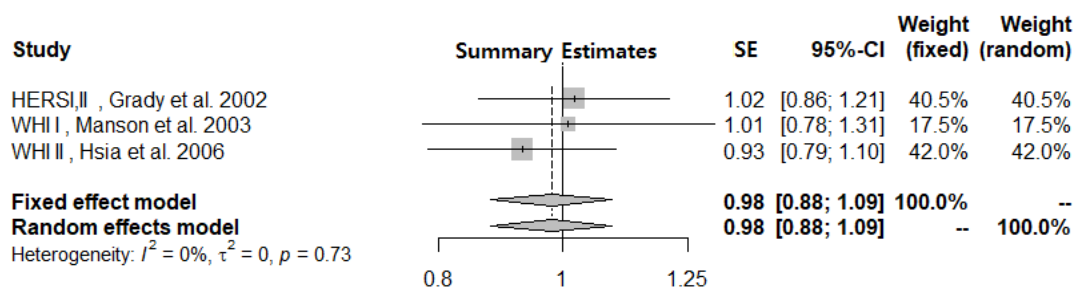

Summary estimates (95% CI) were measured by fixed-effect models if  $I^2$  was <30% and  $P$  for heterogeneity was >0.05; otherwise, the summary estimates (95% CI) were measured by random-effect models. Forest and funnel plots were generated by "meta" package in R version 3.4.1. MHT, menopausal hormone therapy; RCTs, randomized controlled trials; SE, summary estimates.

Supplementary Figure S3.9.3. MHT and revascularization in RCTs: subgroup results by timing of initiation.

(a) early users

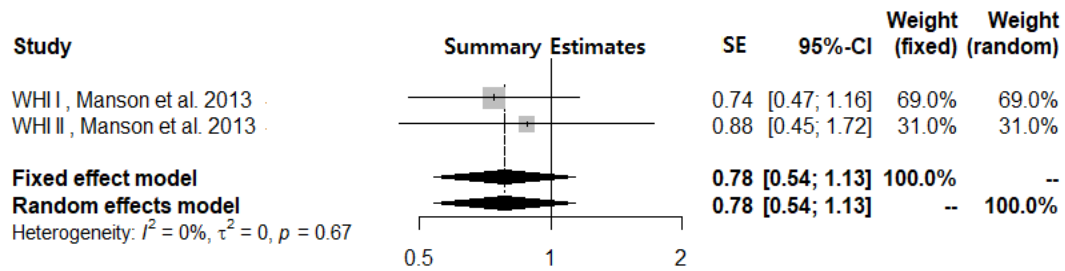

(b) late users

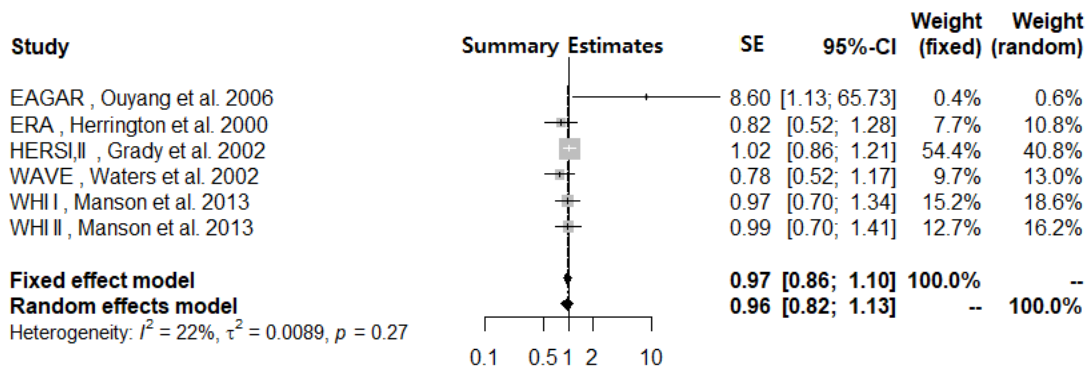

Summary estimates (95% CI) were measured by fixed-effect models if  $I^2$  was  $<30\%$  and  $P$  for heterogeneity was  $>0.05$ ; otherwise, the summary estimates (95% CI) were measured by random-effect models. Forest and funnel plots were generated by "meta" package in R version 3.4.1. MHT, menopausal hormone therapy; RCTs, randomized controlled trials; SE, summary estimates.



Supplementary Figure S3.9.4. MHT and revascularization in RCTs: subgroup results by underlying disease.

(a) women with diseases

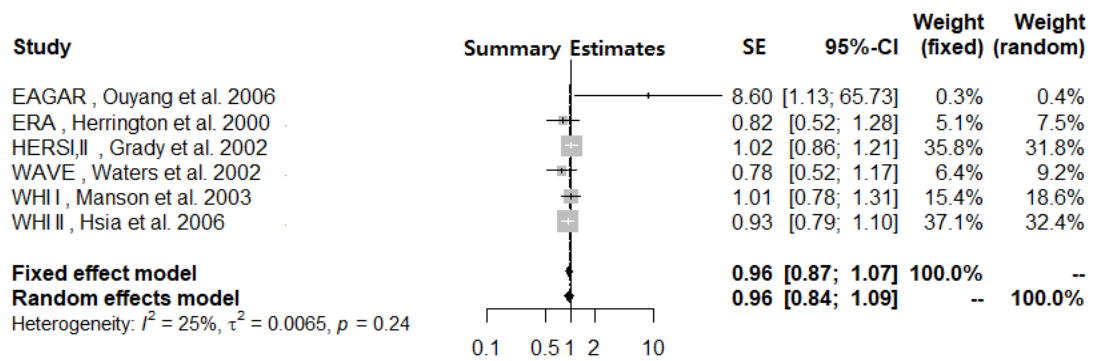

(b) women without diseases (relatively healthy)

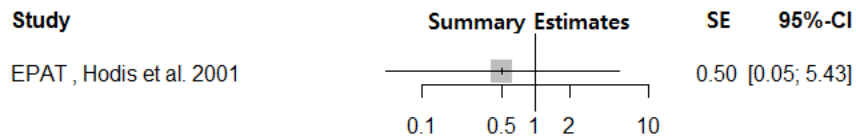

Summary estimates (95% CI) were measured by fixed-effect models if  $I^2$  was  $<30\%$  and  $P$  for heterogeneity was  $>0.05$ ; otherwise, the summary estimates (95% CI) were measured by random-effect models. Forest and funnel plots were generated by "meta" package in R version 3.4.1. MHT, menopausal hormone therapy; RCTs, randomized controlled trials; SE, summary estimates.

Supplementary Figure S4.1.1. MHT and all-cause death in observational studies: subgroup results by regimen type.

(a) estrogen only

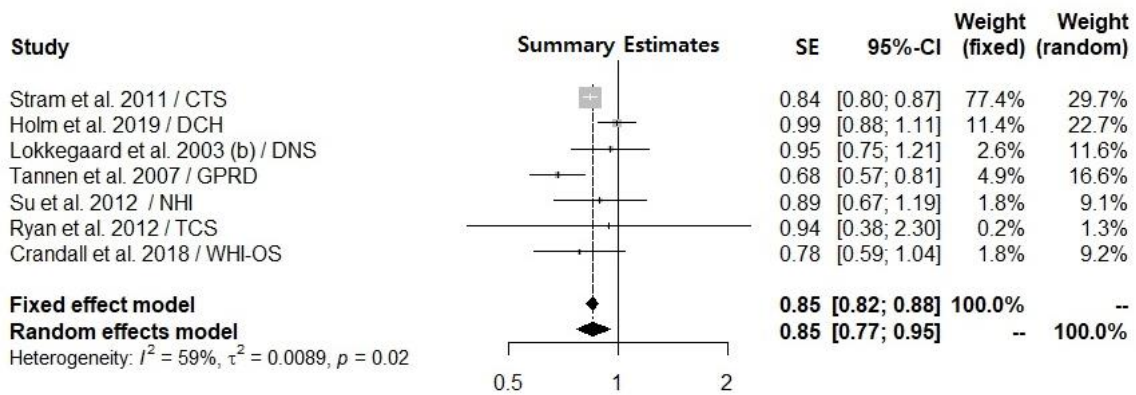

(b) combined EP

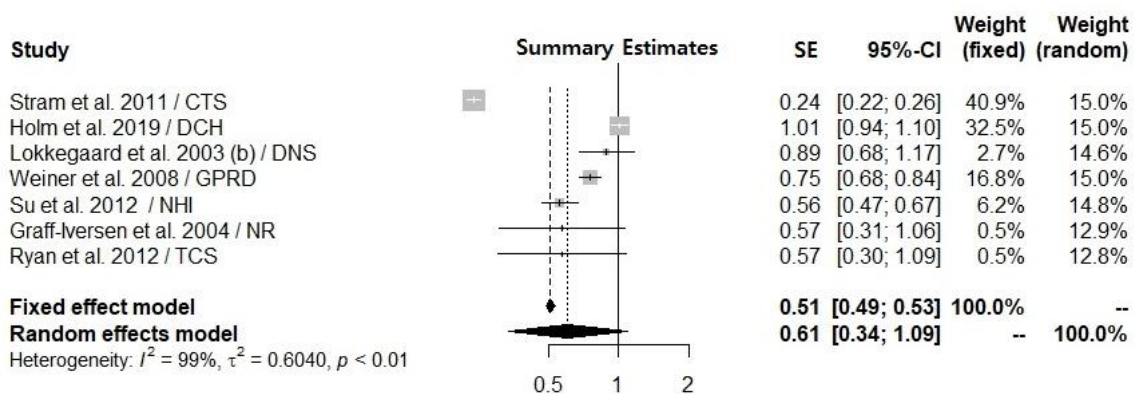

Summary estimates (95% CI) were measured by fixed-effect models if  $I^2$  was  $<30\%$  and  $P$  for heterogeneity was  $>0.05$ ; otherwise, the summary estimates (95% CI) were measured by random-effect models. Forest and funnel plots were generated by "meta" package in R version 3.4.1. MHT, menopausal hormone therapy; SE, summary estimates.

Supplementary Figure S4.1.2. MHT and all-cause death in observational studies: subgroup results by duration of use.

(a) duration < 5 years

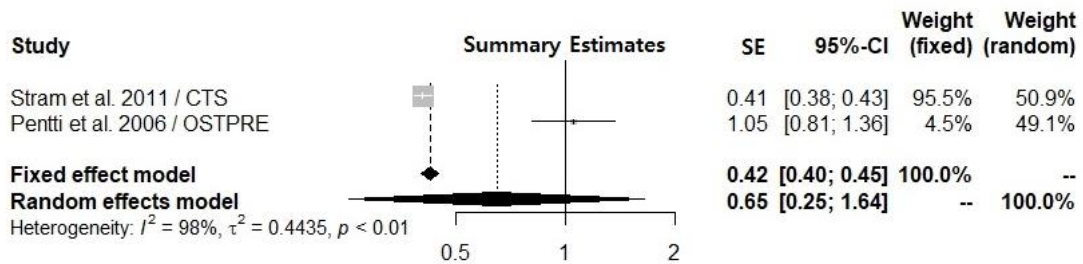

(b) duration  $\geq 5$  years

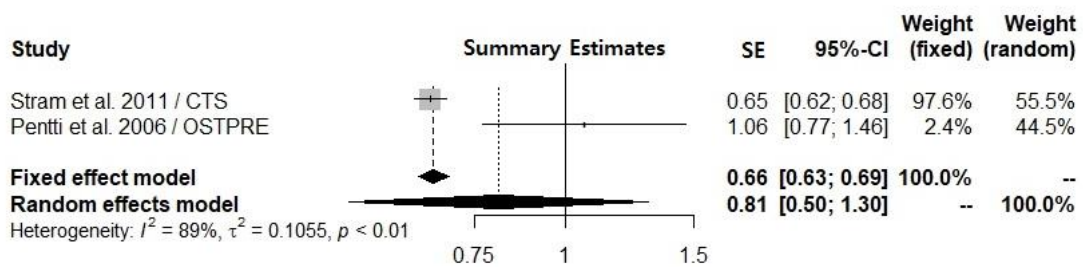

Summary estimates (95% CI) were measured by fixed-effect models if  $I^2$  was <30% and  $P$  for heterogeneity was >0.05; otherwise, the summary estimates (95% CI) were measured by random-effect models. Forest and funnel plots were generated by "meta" package in R version 3.4.1. MHT, menopausal hormone therapy; SE, summary estimates.

Supplementary Figure S4.1.3. MHT and all-cause death in observational studies: subgroup results by timing of initiation.

(a) early users

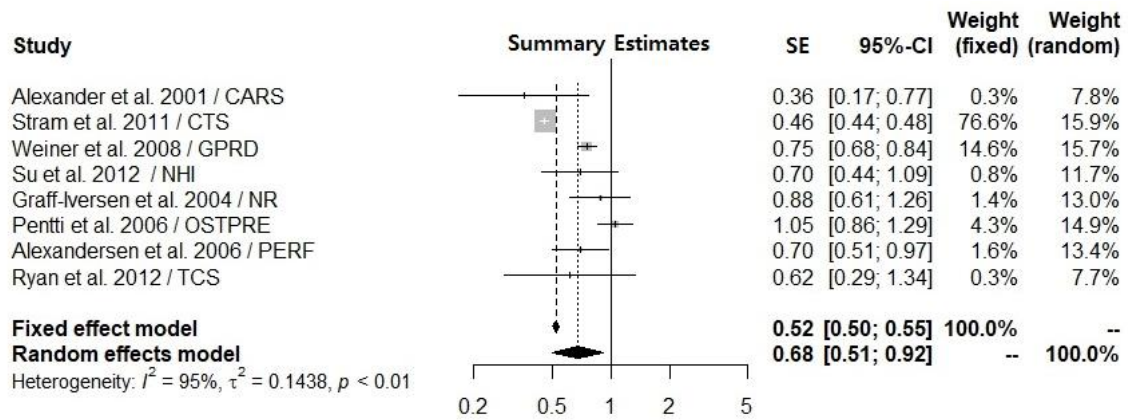

(b) late users

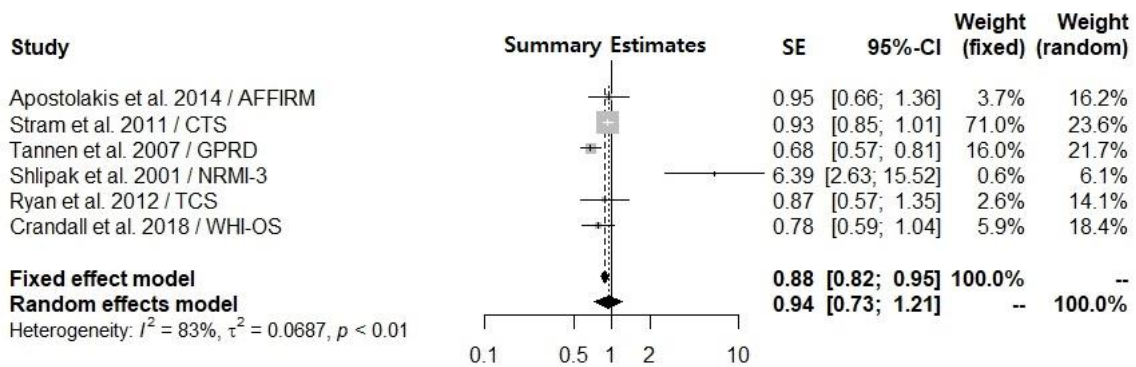

Summary estimates (95% CI) were measured by fixed-effect models if  $I^2$  was  $<30\%$  and  $P$  for heterogeneity was  $>0.05$ ; otherwise, the summary estimates (95% CI) were measured by random-effect models. Forest and funnel plots were generated by "meta" package in R version 3.4.1. MHT, menopausal hormone therapy; SE, summary estimates.

Supplementary Figure S4.1.4. MHT and all-cause death in observational studies: subgroup results by route of administration.

(a) oral

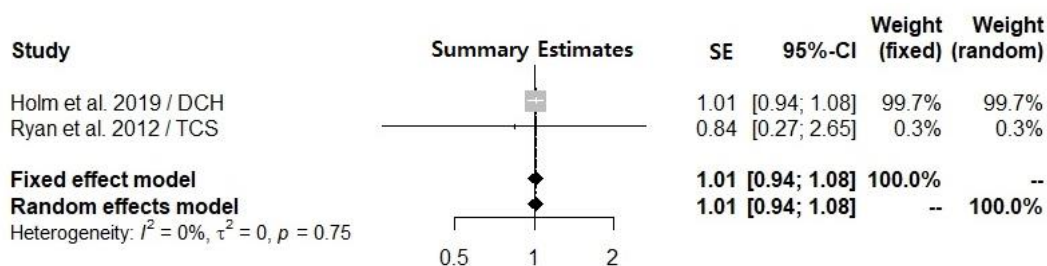

(a) non-oral

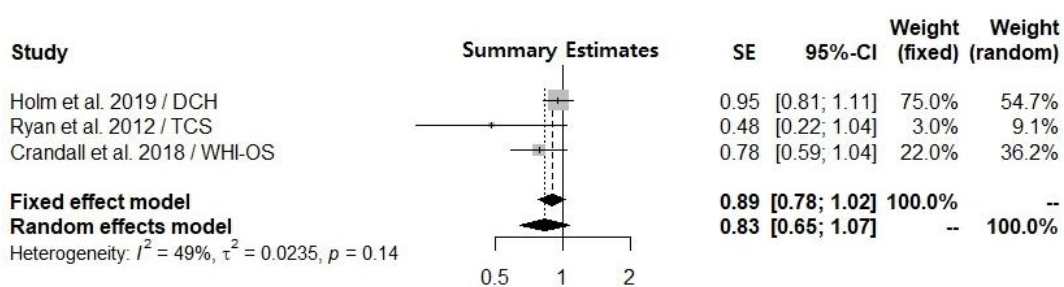

Summary estimates (95% CI) were measured by fixed-effect models if  $I^2$  was  $<30\%$  and  $P$  for heterogeneity was  $>0.05$ ; otherwise, the summary estimates (95% CI) were measured by random-effect models. Forest and funnel plots were generated by "meta" package in R version 3.4.1. MHT, menopausal hormone therapy; SE, summary estimates.

Supplementary Figure S4.1.5. MHT and all-cause death in observational studies: subgroup results by underlying disease.

(a) women with diseases

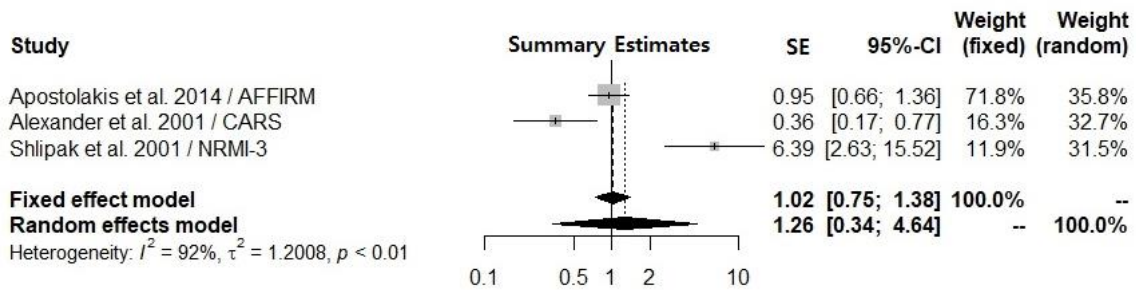

(b) women without diseases (relatively healthy)

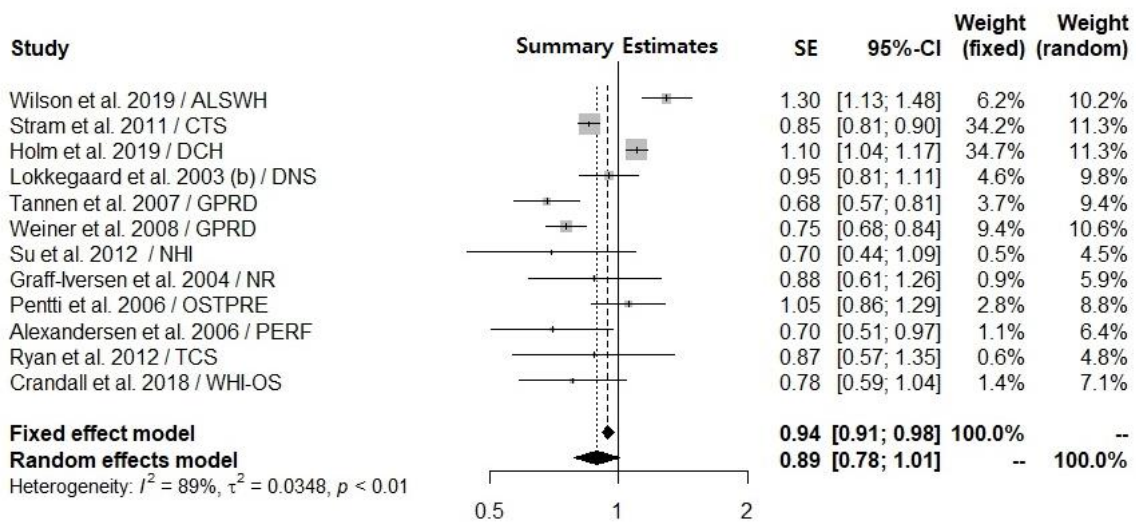

Summary estimates (95% CI) were measured by fixed-effect models if  $I^2$  was  $<30\%$  and  $P$  for heterogeneity was  $>0.05$ ; otherwise, the summary estimates (95% CI) were measured by random-effect models. Forest and funnel plots were generated by "meta" package in R version 3.4.1. MHT, menopausal hormone therapy; SE, summary estimates.

Supplementary Figure S4.1.6. MHT and all-cause death in observational studies: subgroup results by recency of MHT.

(a) *past*

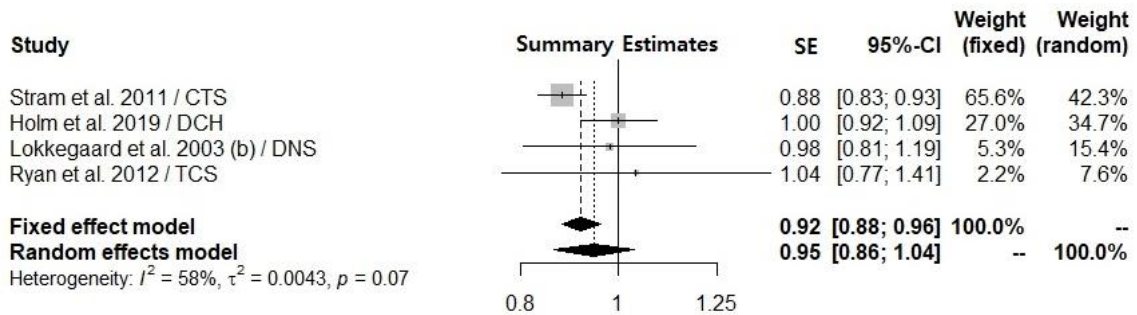

(b) *current*

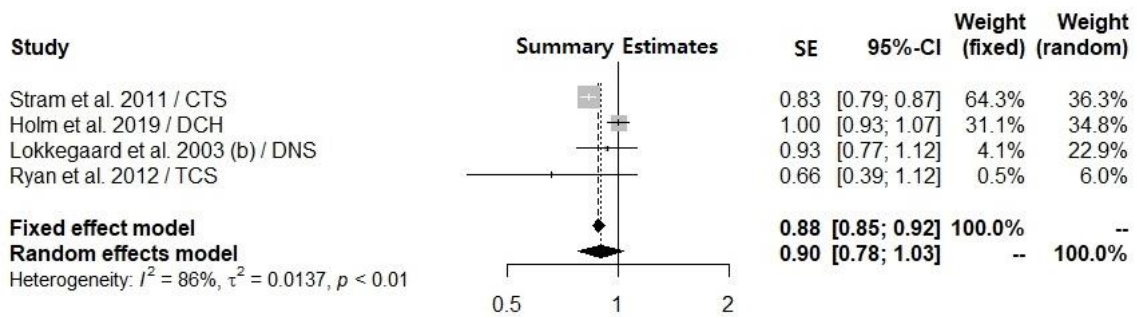

Summary estimates (95% CI) were measured by fixed-effect models if  $I^2$  was  $<30\%$  and  $P$  for heterogeneity was  $>0.05$ ; otherwise, the summary estimates (95% CI) were measured by random-effect models. Forest and funnel plots were generated by "meta" package in R version 3.4.1. MHT, menopausal hormone therapy; SE, summary estimates.

Supplementary Figure S4.1.7. MHT and all-cause death in observational studies: subgroup results by study design.

(a) cohort

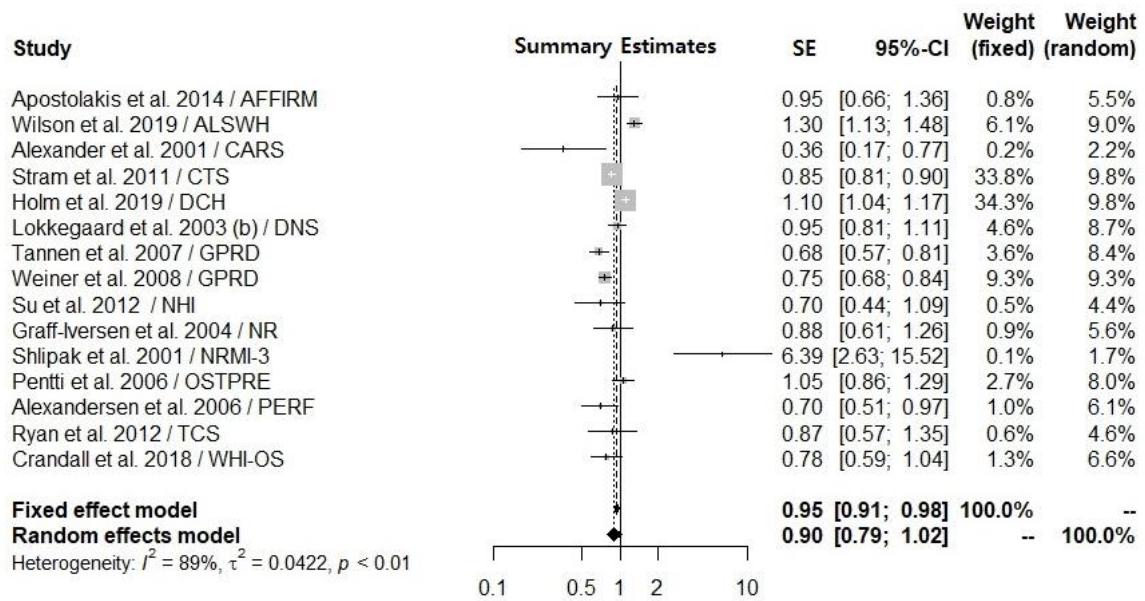

Summary estimates (95% CI) were measured by fixed-effect models if  $I^2$  was  $<30\%$  and  $P$  for heterogeneity was  $>0.05$ ; otherwise, the summary estimates (95% CI) were measured by random-effect models. Forest and funnel plots were generated by "meta" package in R version 3.4.1. MHT, menopausal hormone therapy; SE, summary estimates.



Supplementary Figure S4.1.8. MHT and all-cause death in observational studies: subgroup results by study quality.

(a) good and fair

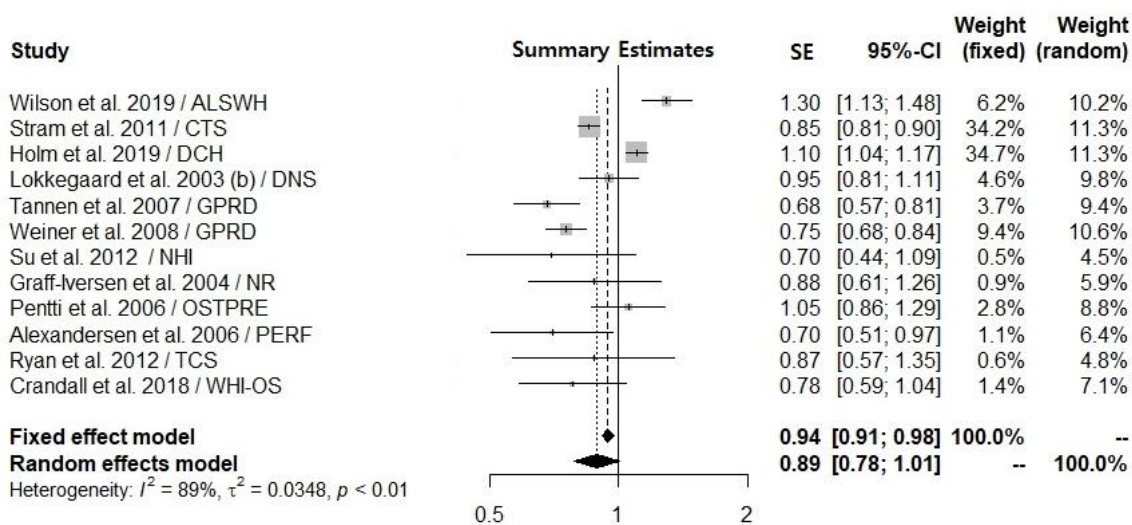

(b) poor

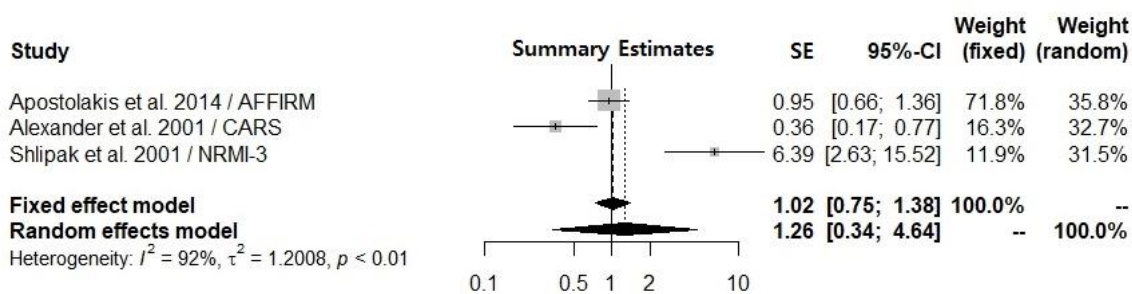

Summary estimates (95% CI) were measured by fixed-effect models if  $I^2$  was  $<30\%$  and  $P$  for heterogeneity was  $>0.05$ ; otherwise, the summary estimates (95% CI) were measured by random-effect models. Forest and funnel plots were generated by "meta" package in R version 3.4.1. MHT, menopausal hormone therapy; SE, summary estimates.

Supplementary Figure S4.2.1. MHT and stroke in observational studies: subgroup results by regimen type.

(a) estrogen only

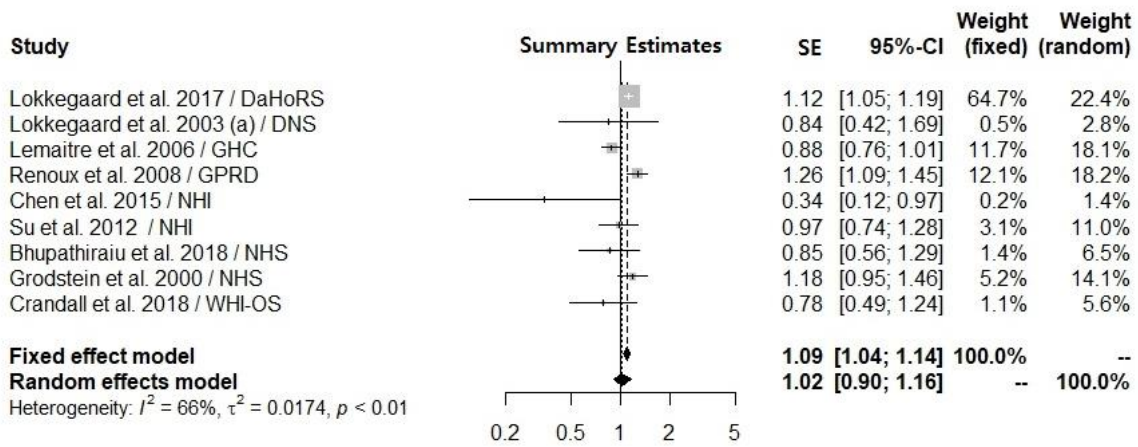

(b) combined EP

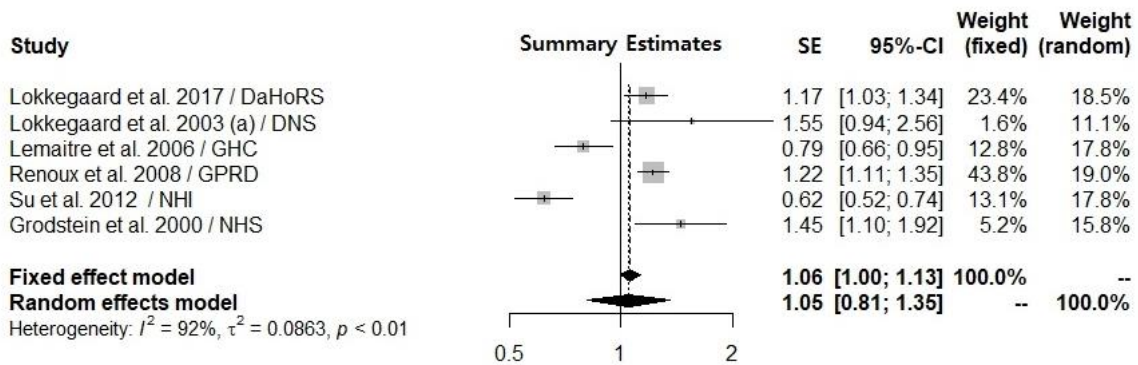

Summary estimates (95% CI) were measured by fixed-effect models if  $I^2$  was  $<30\%$  and  $P$  for heterogeneity was  $>0.05$ ; otherwise, the summary estimates (95% CI) were measured by random-effect models. Forest and funnel plots were generated by "meta" package in R version 3.4.1. MHT, menopausal hormone therapy; SE, summary estimates.

Supplementary Figure S4.2.2. MHT and stroke in observational studies: subgroup results by duration of use.

(a) duration < 5 years

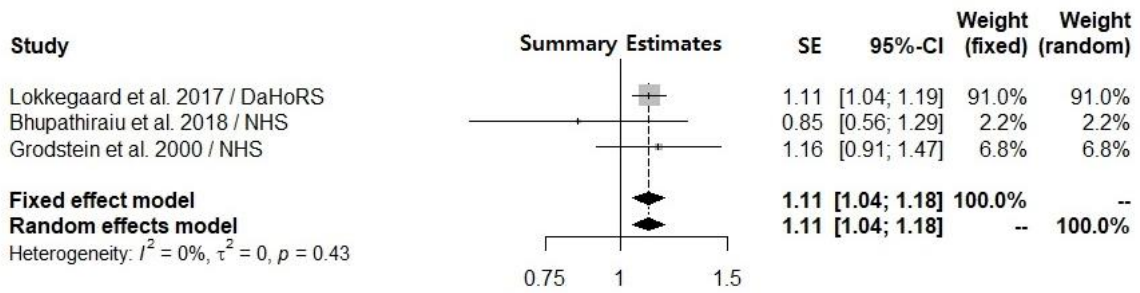

(b) duration  $\geq 5$  years

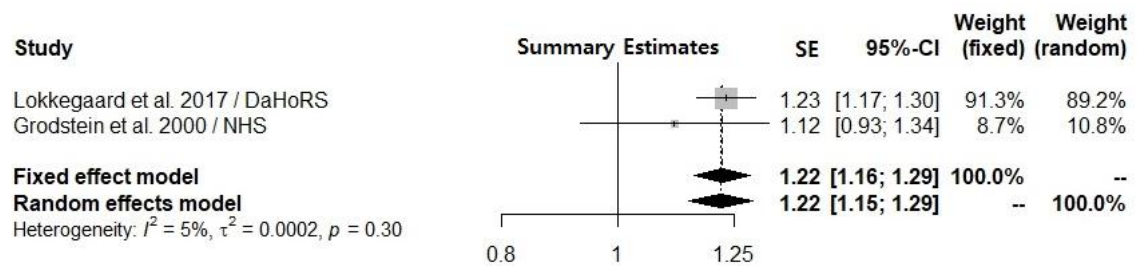

Summary estimates (95% CI) were measured by fixed-effect models if  $I^2$  was <30% and  $P$  for heterogeneity was >0.05; otherwise, the summary estimates (95% CI) were measured by random-effect models. Forest and funnel plots were generated by "meta" package in R version 3.4.1. MHT, menopausal hormone therapy; SE, summary estimates.

Supplementary Figure S4.2.3. MHT and stroke in observational studies: subgroup results by timing of initiation.

(a) early users

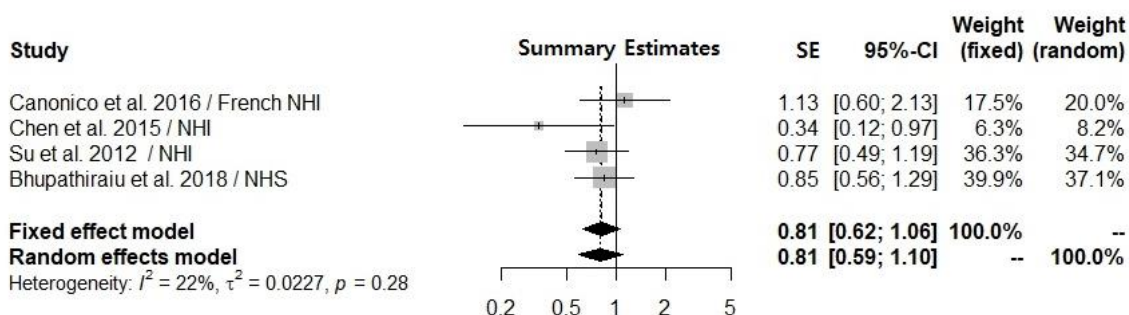

(b) late users

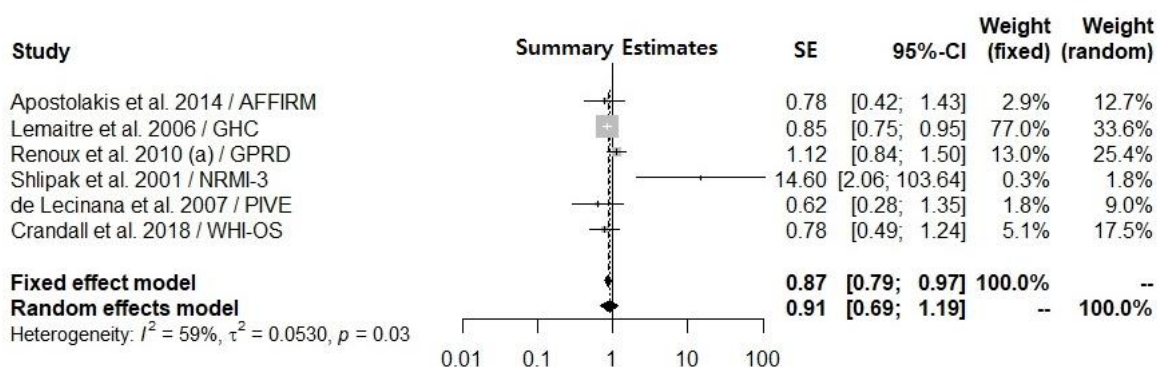

Summary estimates (95% CI) were measured by fixed-effect models if  $I^2$  was  $<30\%$  and  $P$  for heterogeneity was  $>0.05$ ; otherwise, the summary estimates (95% CI) were measured by random-effect models. Forest and funnel plots were generated by "meta" package in R version 3.4.1. MHT, menopausal hormone therapy; SE, summary estimates.

Supplementary Figure S4.2.4. MHT and stroke in observational studies: subgroup results by route of administration.

(a) oral

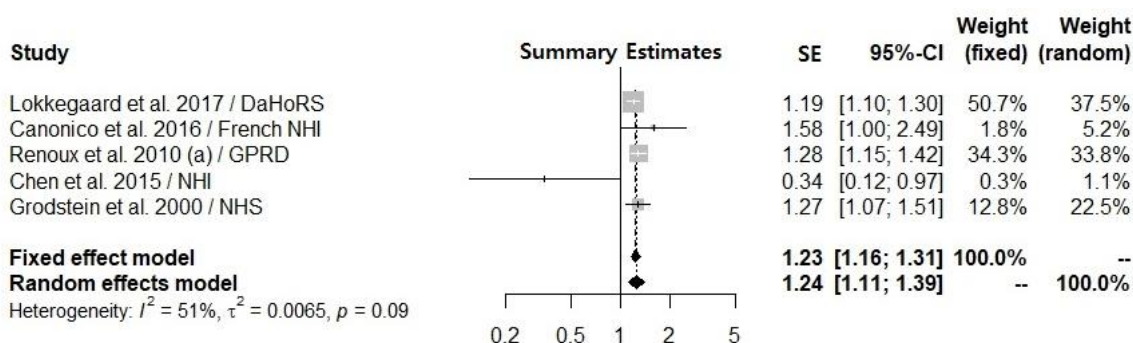

(b) non-oral

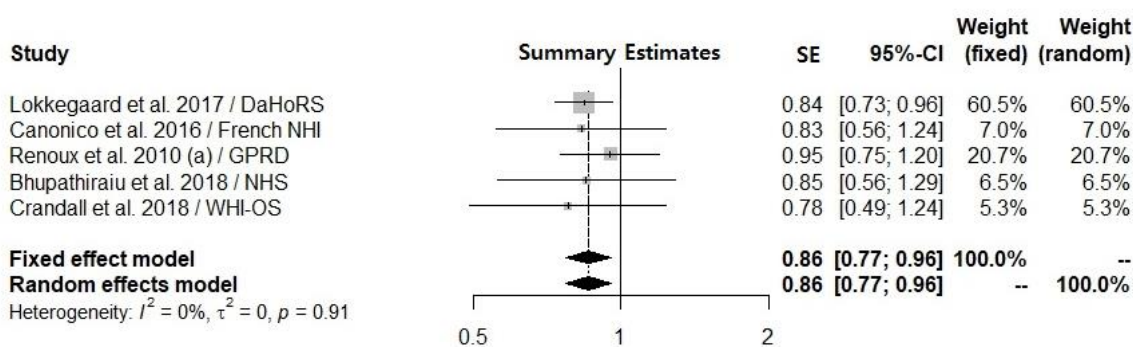

Summary estimates (95% CI) were measured by fixed-effect models if  $I^2$  was  $<30\%$  and  $P$  for heterogeneity was  $>0.05$ ; otherwise, the summary estimates (95% CI) were measured by random-effect models. Forest and funnel plots were generated by "meta" package in R version 3.4.1. MHT, menopausal hormone therapy; SE, summary estimates.

Supplementary Figure S4.2.5. MHT and stroke in observational studies: subgroup results by underlying disease.

(a) women with diseases

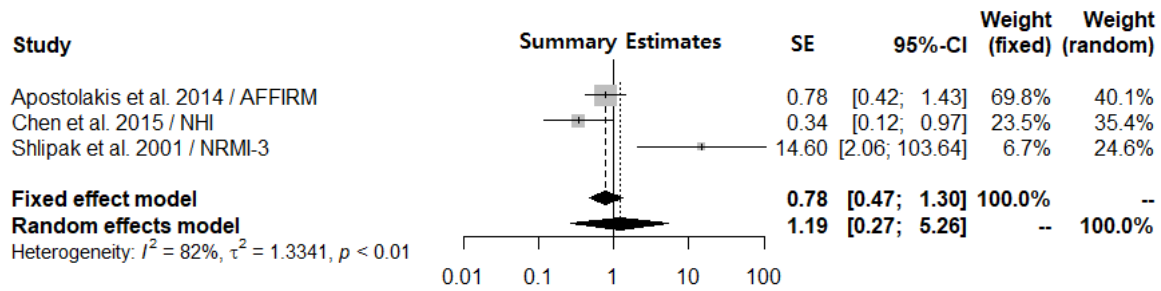

(b) women without diseases (relatively healthy)

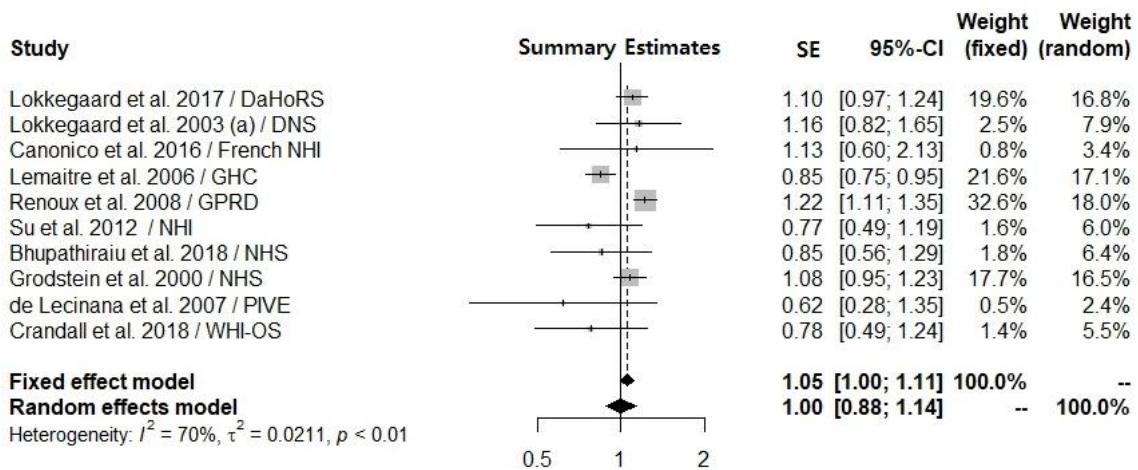

Summary estimates (95% CI) were measured by fixed-effect models if  $I^2$  was  $<30\%$  and  $P$  for heterogeneity was  $>0.05$ ; otherwise, the summary estimates (95% CI) were measured by random-effect models. Forest and funnel plots were generated by "meta" package in R version 3.4.1. MHT, menopausal hormone therapy; SE, summary estimates.

Supplementary Figure S4.2.6. MHT and stroke in observational studies: subgroup results by recency of MHT.

(a) *past*

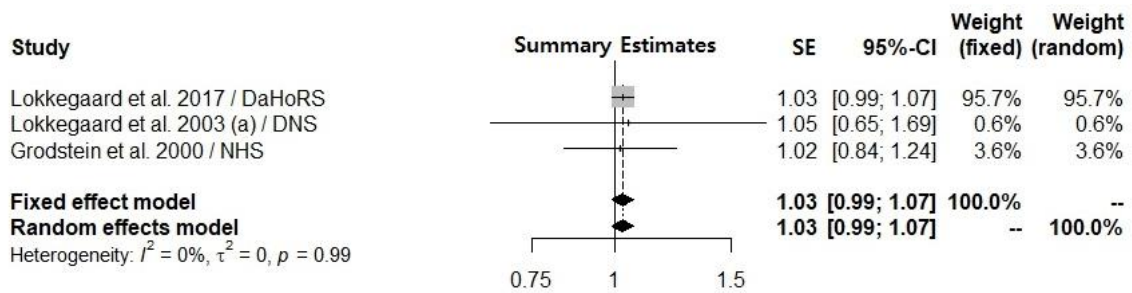

(b) *current*

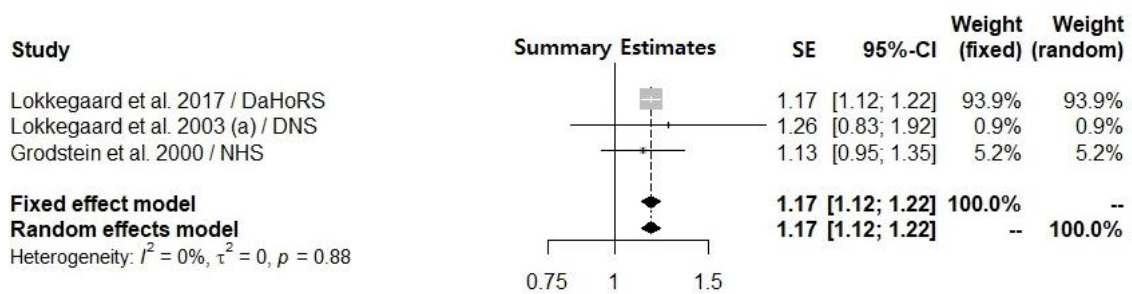

Summary estimates (95% CI) were measured by fixed-effect models if  $I^2$  was  $<30\%$  and  $P$  for heterogeneity was  $>0.05$ ; otherwise, the summary estimates (95% CI) were measured by random-effect models. Forest and funnel plots were generated by "meta" package in R version 3.4.1. MHT, menopausal hormone therapy; SE, summary estimates.

Supplementary Figure S4.2.7. MHT and stroke in observational studies: subgroup results by study design.

(a) cohort

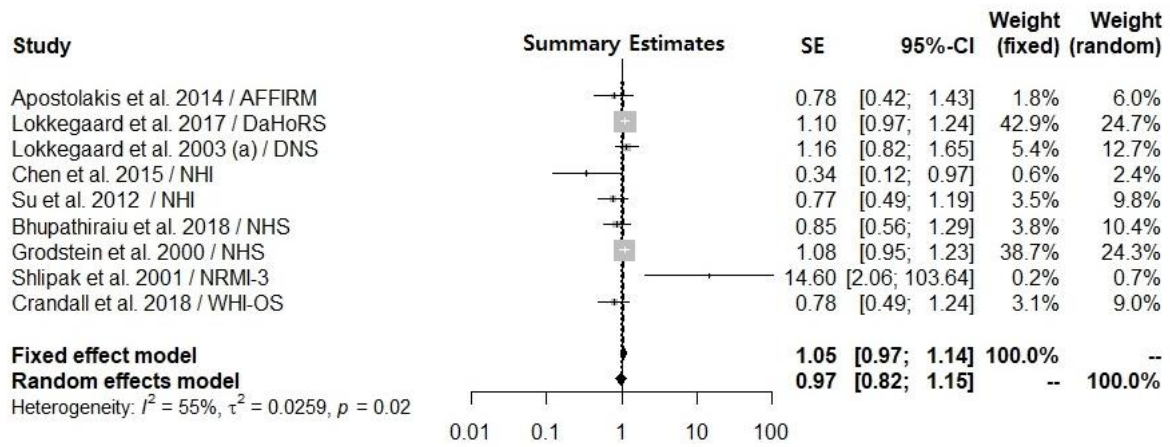

(b) case-control study

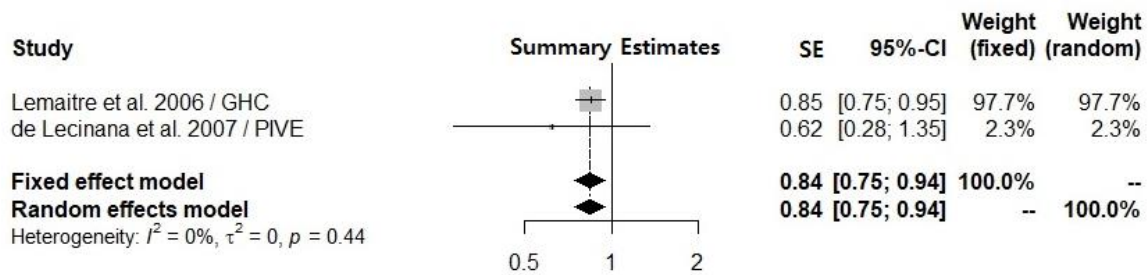

(c) nested case-control study

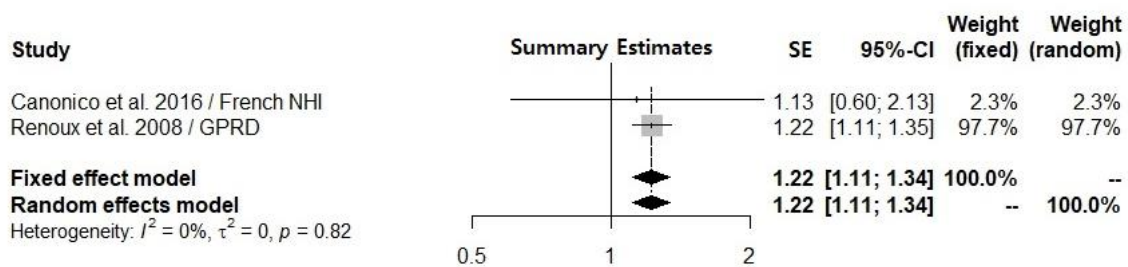

Summary estimates (95% CI) were measured by fixed-effect models if  $I^2$  was  $<30\%$  and  $P$  for heterogeneity was  $>0.05$ ; otherwise, the summary estimates (95% CI) were measured by random-effect models. Forest and funnel plots were generated by "meta" package in R version 3.4.1. MHT, menopausal hormone therapy; SE, summary estimates.



Supplementary Figure S4.2.8. MHT and stroke in observational studies: subgroup results by study quality.

(a) good and fair

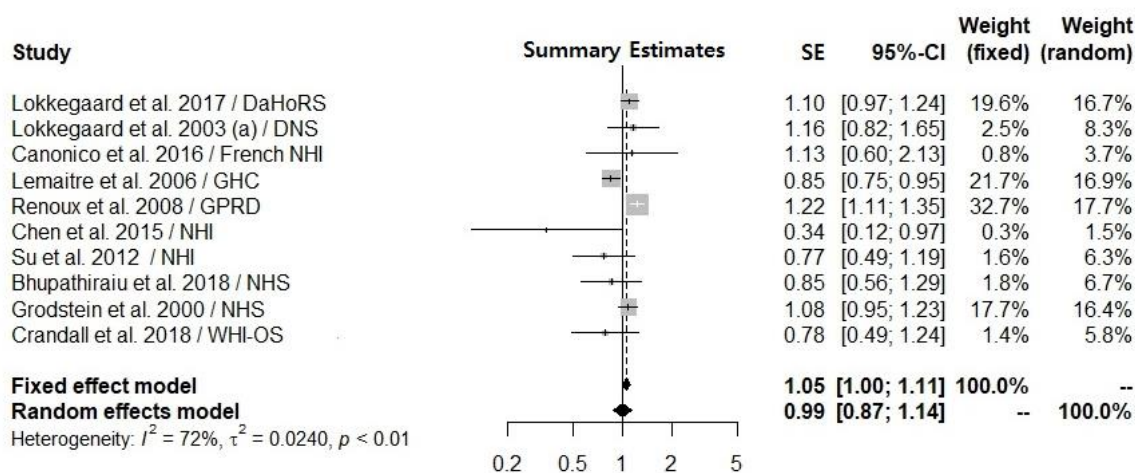

(b) poor

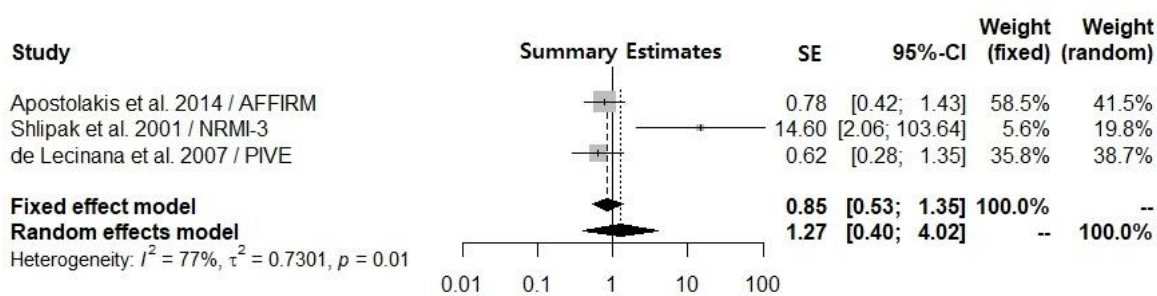

Summary estimates (95% CI) were measured by fixed-effect models if  $I^2$  was  $<30\%$  and  $P$  for heterogeneity was  $>0.05$ ; otherwise, the summary estimates (95% CI) were measured by random-effect models. Forest and funnel plots were generated by "meta" package in R version 3.4.1. MHT, menopausal hormone therapy; SE, summary estimates.

Supplementary Figure S4.3.1. MHT and VTE in observational studies: subgroup results by regimen type.

(a) estrogen only

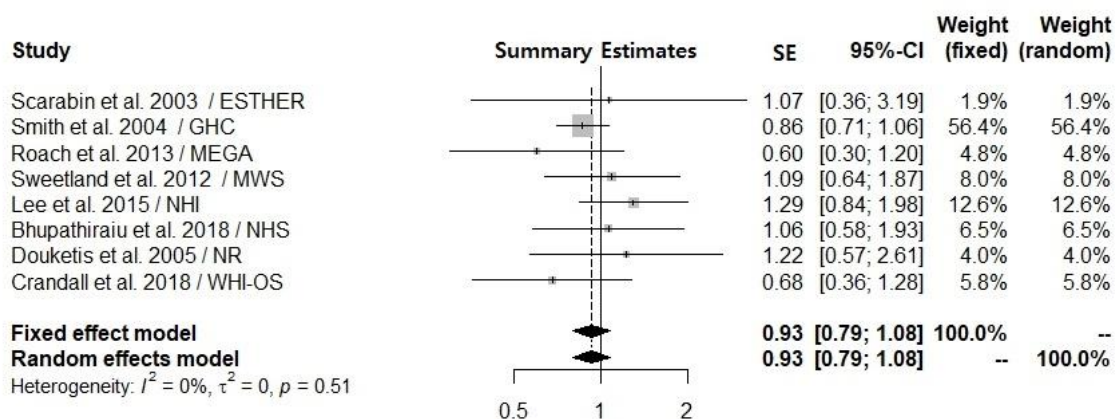

(b) combined EP

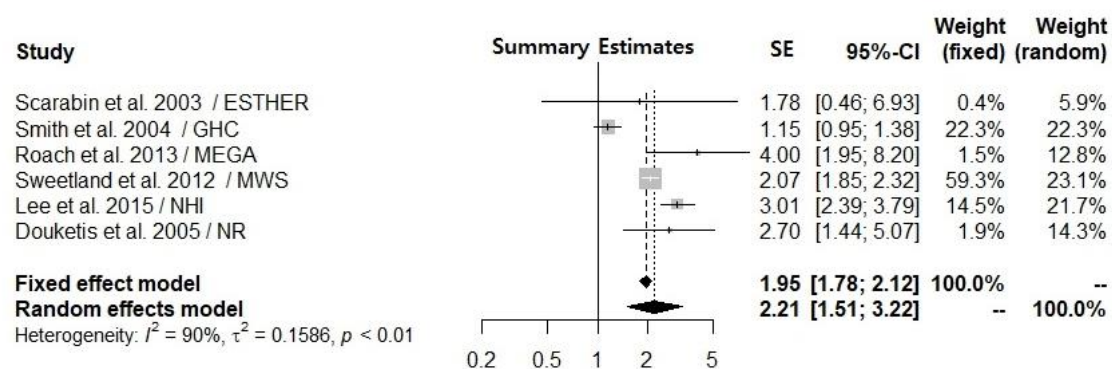

Summary estimates (95% CI) were measured by fixed-effect models if  $I^2$  was  $<30\%$  and  $P$  for heterogeneity was  $>0.05$ ; otherwise, the summary estimates (95% CI) were measured by random-effect models. Forest and funnel plots were generated by "meta" package in R version 3.4.1. MHT, menopausal hormone therapy; SE, summary estimates; VTE, venous thromboembolism.

Supplementary Figure S4.3.2. MHT and VTE in observational studies: subgroup results by duration of use.

(a) duration < 5 years

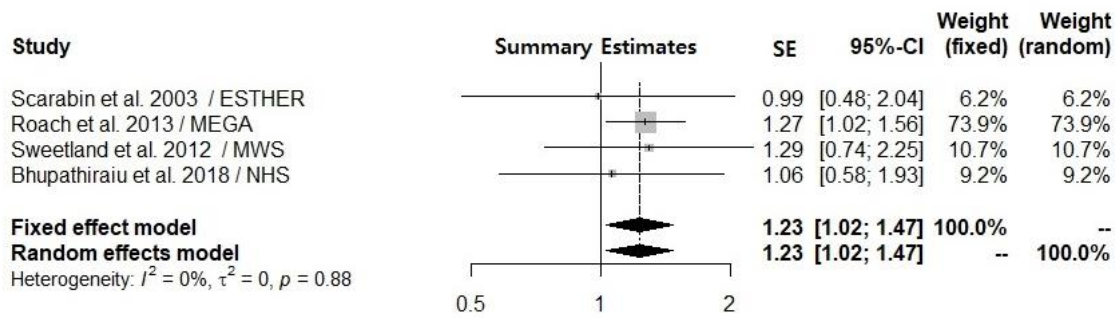

(b) duration  $\geq 5$  years

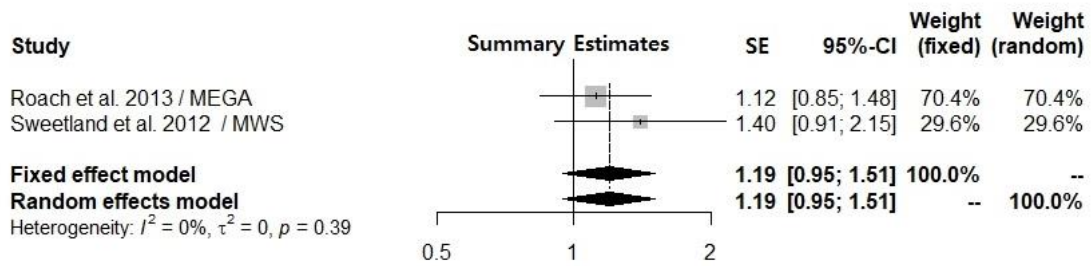

Summary estimates (95% CI) were measured by fixed-effect models if  $I^2$  was <30% and  $P$  for heterogeneity was >0.05; otherwise, the summary estimates (95% CI) were measured by random-effect models. Forest and funnel plots were generated by "meta" package in R version 3.4.1. MHT, menopausal hormone therapy; SE, summary estimates; VTE, venous thromboembolism.

Supplementary Figure S4.3.3. MHT and VTE in observational studies: subgroup results by timing of initiation.

(a) early users

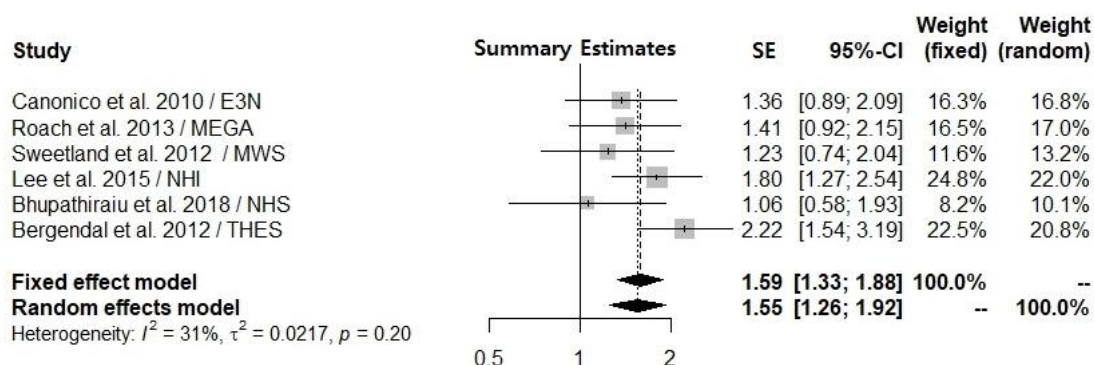

(b) late users

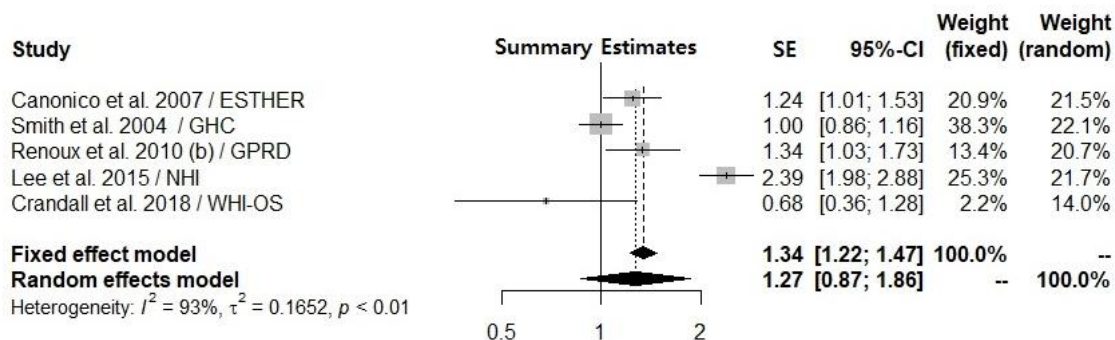

Summary estimates (95% CI) were measured by fixed-effect models if  $I^2$  was  $<30\%$  and  $P$  for heterogeneity was  $>0.05$ ; otherwise, the summary estimates (95% CI) were measured by random-effect models. Forest and funnel plots were generated by "meta" package in R version 3.4.1. MHT, menopausal hormone therapy; SE, summary estimates; VTE, venous thromboembolism.

Supplementary Figure S4.3.4. MHT and VTE in observational studies: subgroup results by route of administration.

(a) oral

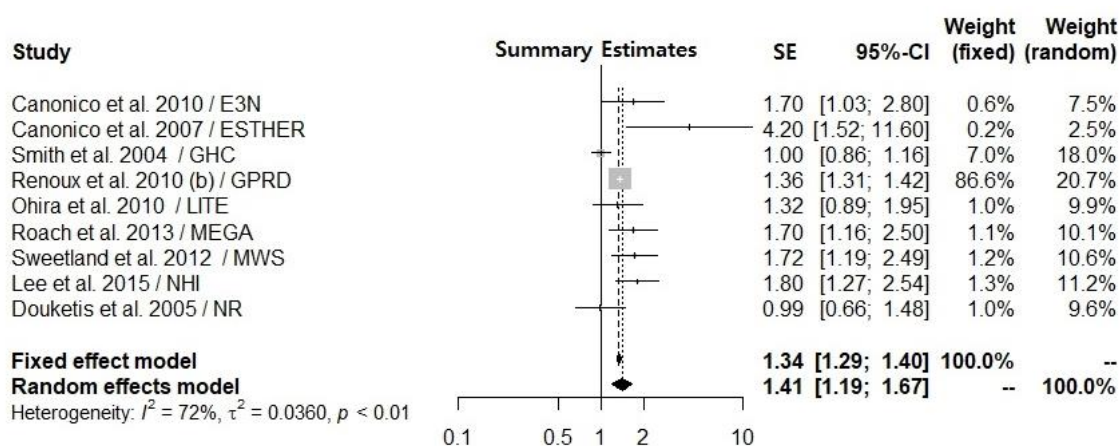

(b) non-oral

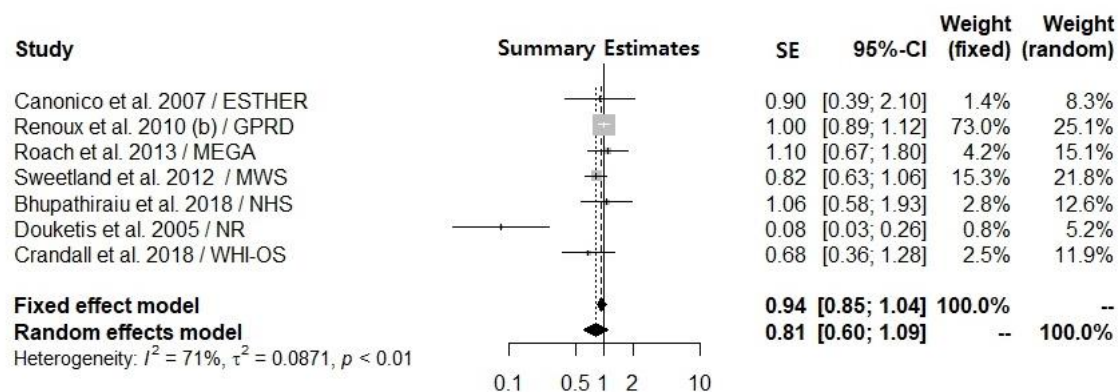

Summary estimates (95% CI) were measured by fixed-effect models if  $I^2$  was  $<30\%$  and  $P$  for heterogeneity was  $>0.05$ ; otherwise, the summary estimates (95% CI) were measured by random-effect models. Forest and funnel plots were generated by "meta" package in R version 3.4.1. MHT, menopausal hormone therapy; SE, summary estimates; VTE, venous thromboembolism.

Supplementary Figure S4.3.5. MHT and VTE in observational studies: subgroup results by underlying disease.

(a) women without diseases (relatively healthy)

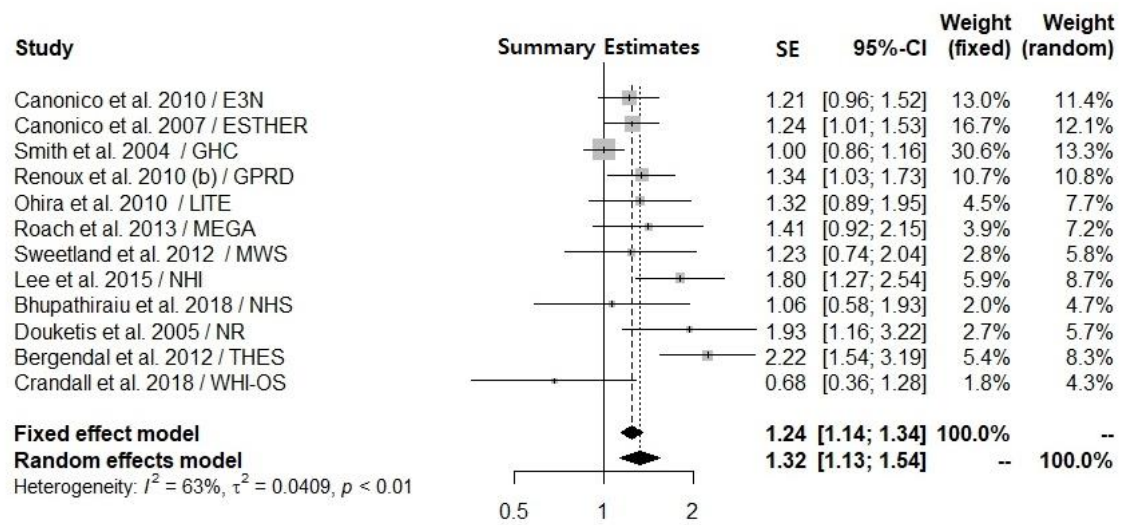

Summary estimates (95% CI) were measured by fixed-effect models if  $I^2$  was  $<30\%$  and  $P$  for heterogeneity was  $>0.05$ ; otherwise, the summary estimates (95% CI) were measured by random-effect models. Forest and funnel plots were generated by "meta" package in R version 3.4.1. MHT, menopausal hormone therapy; SE, summary estimates; VTE, venous thromboembolism.

Supplementary Figure S4.3.6. MHT and VTE in observational studies: subgroup results by recency of MHT.

(a) *past*

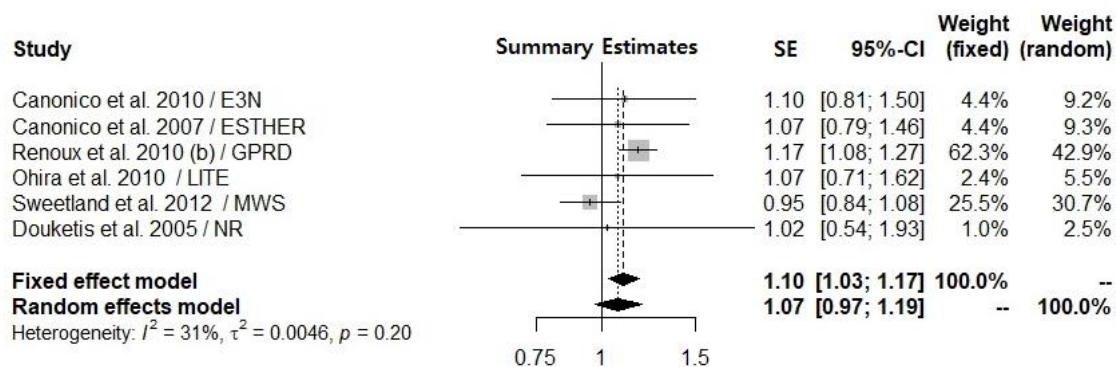

(b) *current*

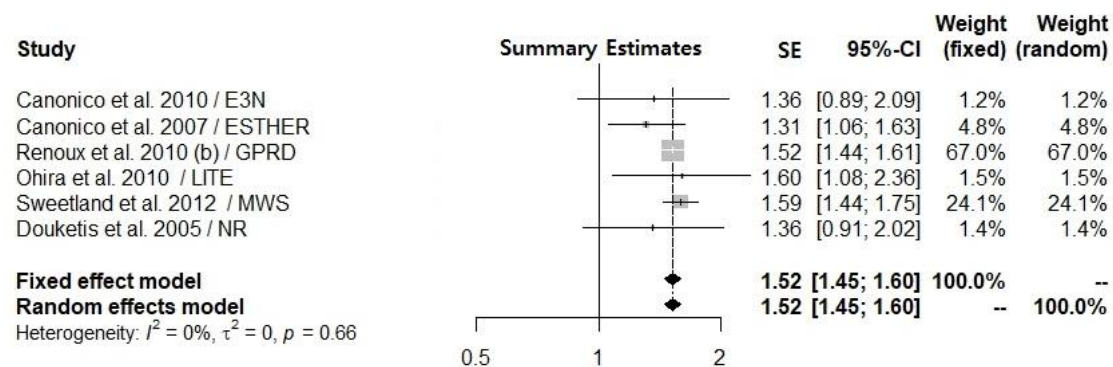

Summary estimates (95% CI) were measured by fixed-effect models if  $I^2$  was  $<30\%$  and  $P$  for heterogeneity was  $>0.05$ ; otherwise, the summary estimates (95% CI) were measured by random-effect models. Forest and funnel plots were generated by "meta" package in R version 3.4.1. MHT, menopausal hormone therapy; SE, summary estimates; VTE, venous thromboembolism.

Supplementary Figure S4.3.7. MHT and VTE in observational studies: subgroup results by study design.

(a) cohort

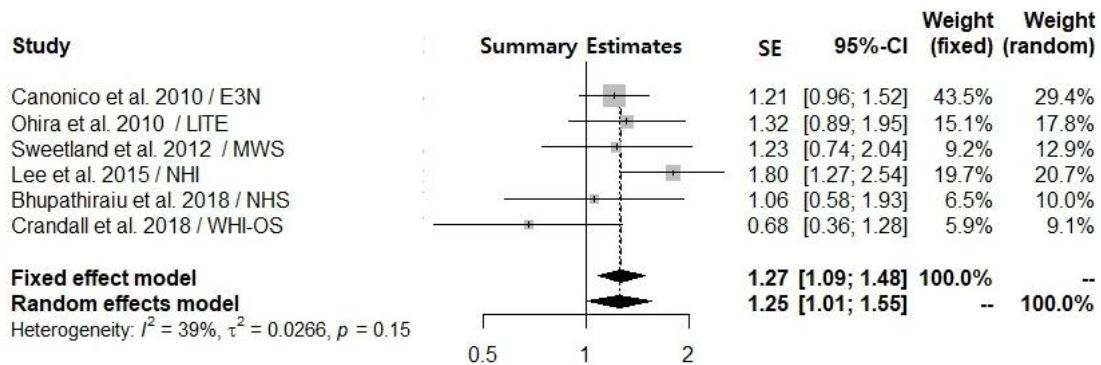

(b) case-control study

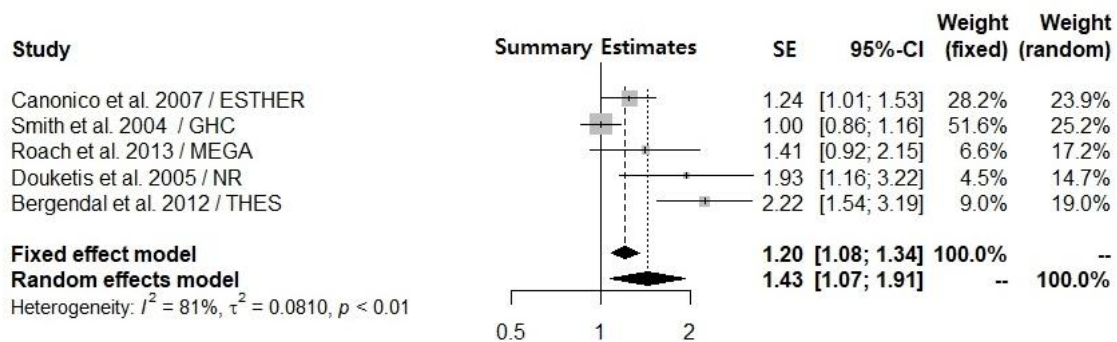

(b) nested case-control study

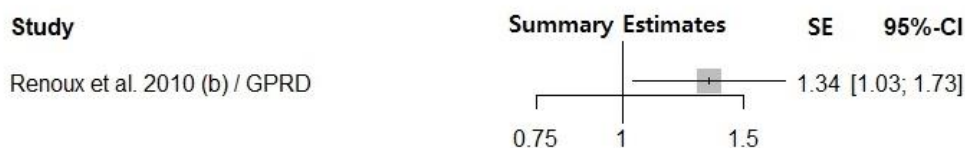

Summary estimates (95% CI) were measured by fixed-effect models if  $I^2$  was  $<30\%$  and  $P$  for heterogeneity was  $>0.05$ ; otherwise, the summary estimates (95% CI) were measured by random-effect models. Forest and funnel plots were generated by "meta" package in R version 3.4.1. MHT, menopausal hormone therapy; SE, summary estimates; VTE, venous thromboembolism.



Supplementary Figure S4.3.8. MHT and VTE in observational studies: subgroup results by study quality.

(a) good and fair

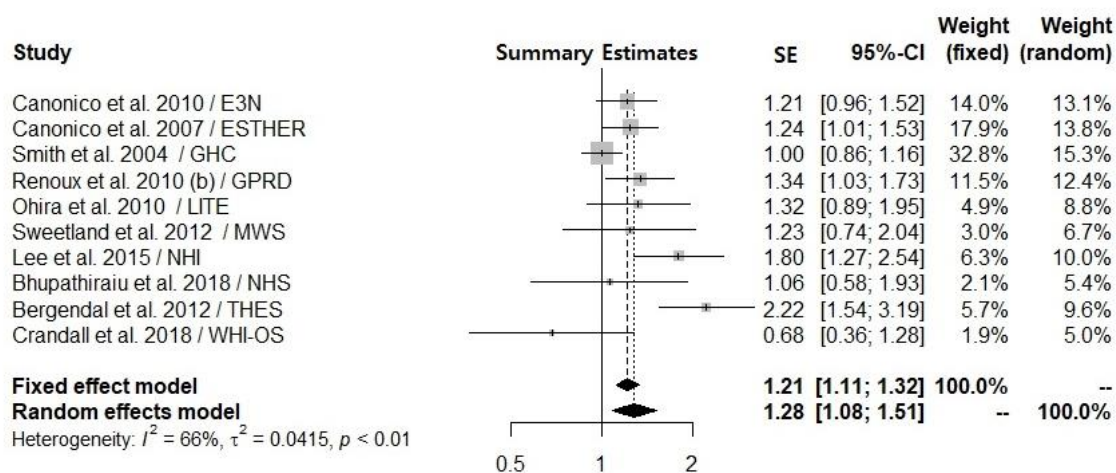

(b) poor

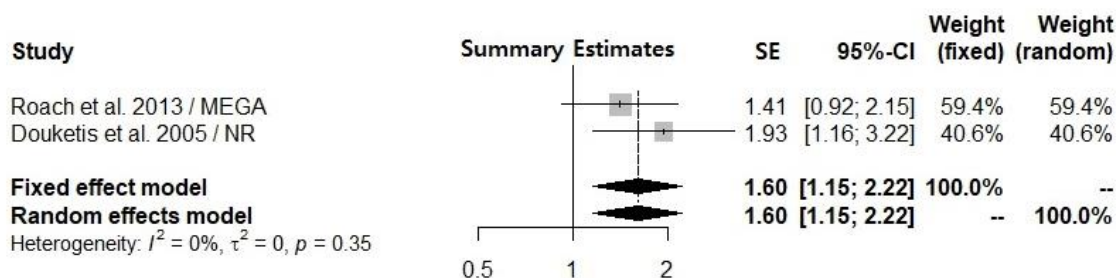

Summary estimates (95% CI) were measured by fixed-effect models if  $I^2$  was  $<30\%$  and  $P$  for heterogeneity was  $>0.05$ ; otherwise, the summary estimates (95% CI) were measured by random-effect models. Forest and funnel plots were generated by "meta" package in R version 3.4.1. MHT, menopausal hormone therapy; SE, summary estimates; VTE, venous thromboembolism.

Supplementary Figure S4.4.1. MHT and MI in observational studies: subgroup results by regimen type.

(a) *estrogen only*

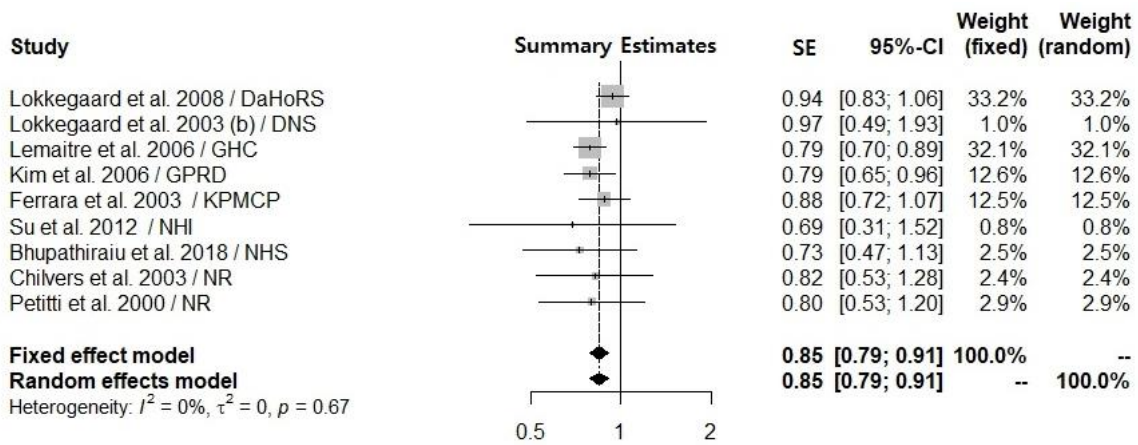

(b) *combined EP*

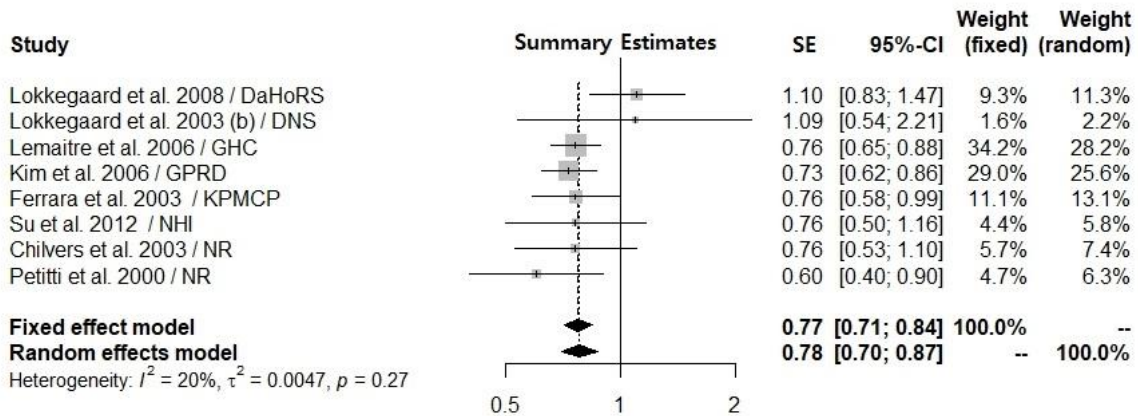

Summary estimates (95% CI) were measured by fixed-effect models if  $I^2$  was  $<30\%$  and  $P$  for heterogeneity was  $>0.05$ ; otherwise, the summary estimates (95% CI) were measured by random-effect models. Forest and funnel plots were generated by "meta" package in R version 3.4.1. MHT, menopausal hormone therapy; MI, myocardial infarction; SE, summary estimates.

Supplementary Figure S4.4.2. MHT and MI in observational studies: subgroup results by duration of use.

(a) duration < 5 years

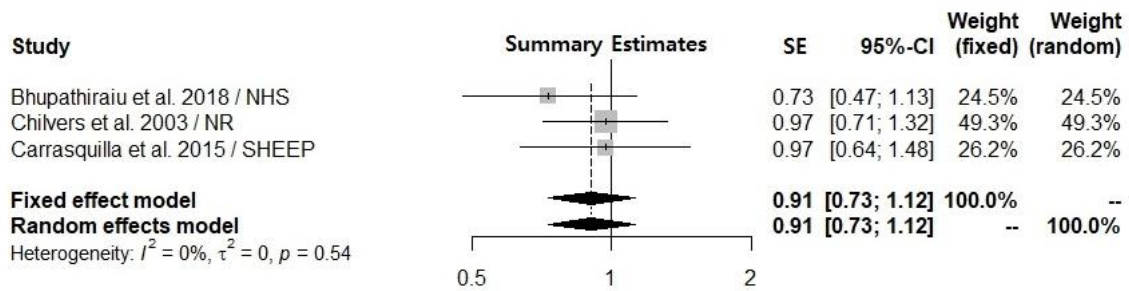

(b) duration  $\geq 5$  years

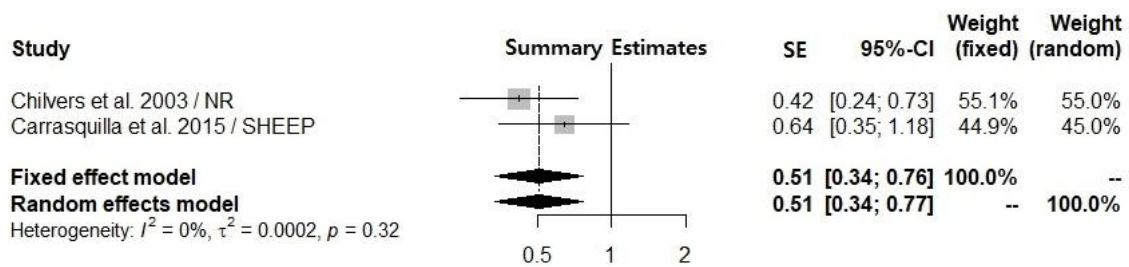

Summary estimates (95% CI) were measured by fixed-effect models if  $I^2$  was <30% and  $P$  for heterogeneity was >0.05; otherwise, the summary estimates (95% CI) were measured by random-effect models. Forest and funnel plots were generated by "meta" package in R version 3.4.1. MHT, menopausal hormone therapy; MI, myocardial infarction; SE, summary estimates.

Supplementary Figure S4.4.3. MHT and MI in observational studies: subgroup results by timing of initiation.

(a) early users

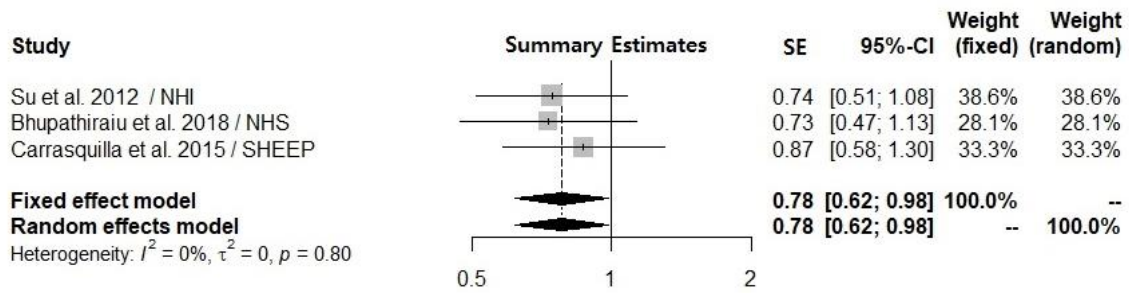

(b) late users

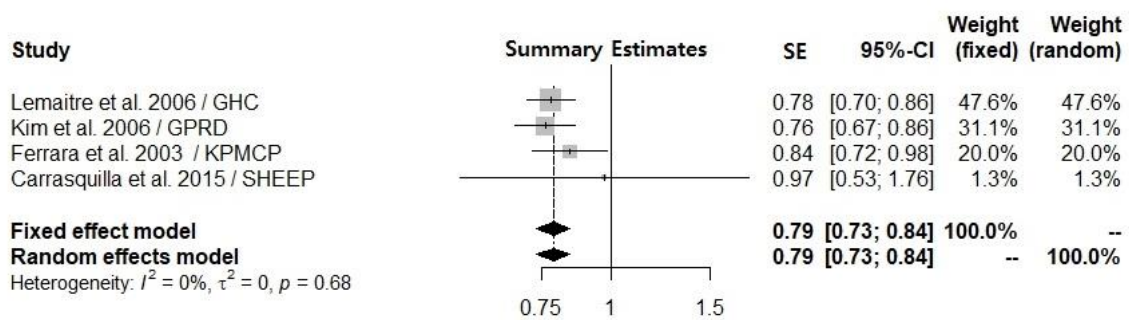

Summary estimates (95% CI) were measured by fixed-effect models if  $I^2$  was  $<30\%$  and  $P$  for heterogeneity was  $>0.05$ ; otherwise, the summary estimates (95% CI) were measured by random-effect models. Forest and funnel plots were generated by "meta" package in R version 3.4.1. MHT, menopausal hormone therapy; MI, myocardial infarction; SE, summary estimates.

Supplementary Figure S4.4.4. MHT and MI in observational studies: subgroup results by route of administration.

(a) oral

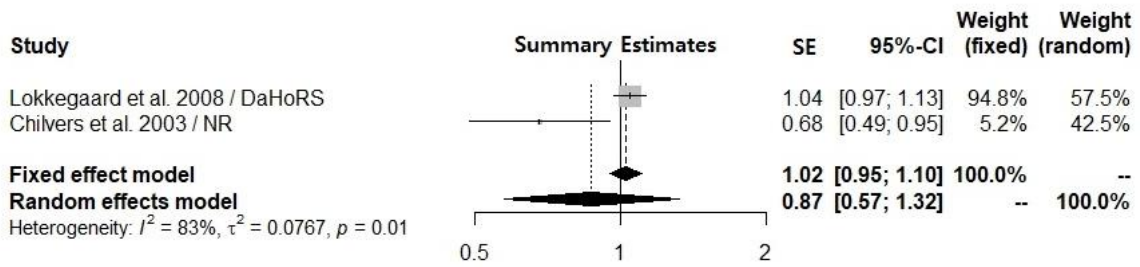

(b) non-oral

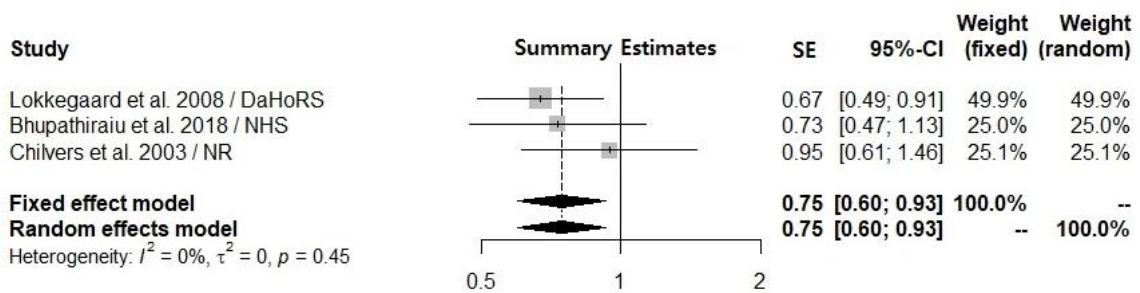

Summary estimates (95% CI) were measured by fixed-effect models if  $I^2$  was  $<30\%$  and  $P$  for heterogeneity was  $>0.05$ ; otherwise, the summary estimates (95% CI) were measured by random-effect models. Forest and funnel plots were generated by "meta" package in R version 3.4.1. MHT, menopausal hormone therapy; MI, myocardial infarction; SE, summary estimates.

Supplementary Figure S4.4.5. MHT and MI in observational studies: subgroup results by underlying disease.

(a) women with diseases

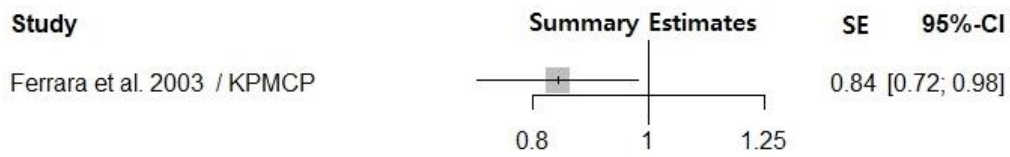

(b) women without diseases (relatively healthy)

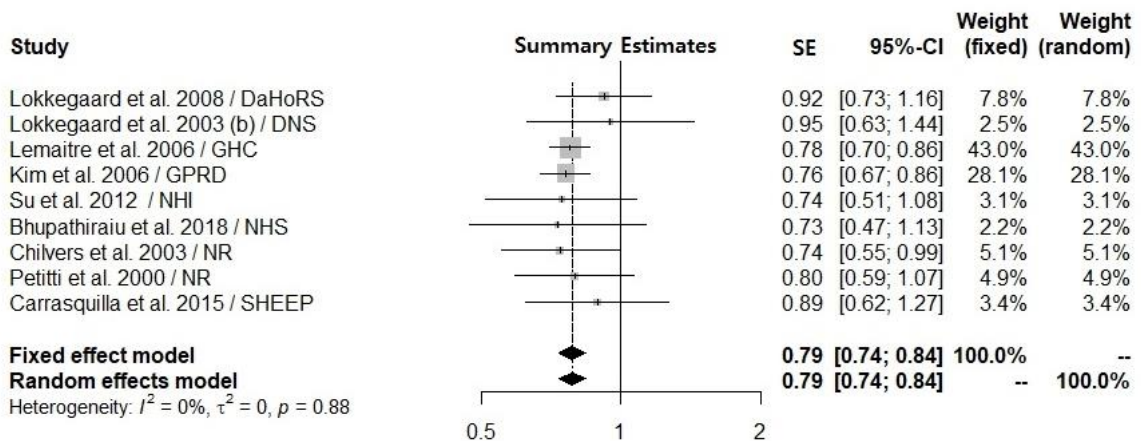

Summary estimates (95% CI) were measured by fixed-effect models if  $I^2$  was  $<30\%$  and  $P$  for heterogeneity was  $>0.05$ ; otherwise, the summary estimates (95% CI) were measured by random-effect models. Forest and funnel plots were generated by "meta" package in R version 3.4.1. MHT, menopausal hormone therapy; MI, myocardial infarction; SE, summary estimates.

Supplementary Figure S4.4.6. MHT and MI in observational studies: subgroup results by recency of MHT.

(a) *past*

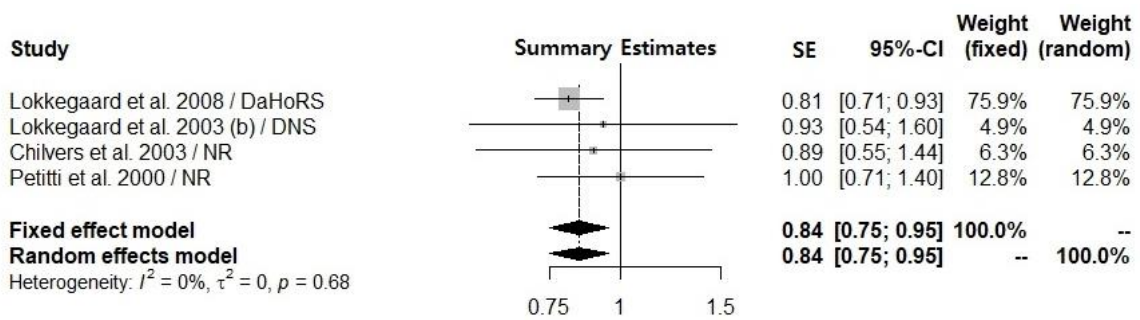

(b) *current*

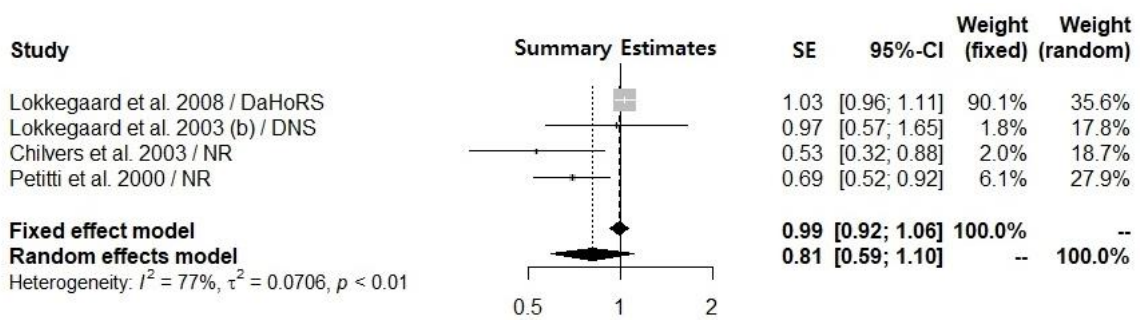

Summary estimates (95% CI) were measured by fixed-effect models if  $I^2$  was  $<30\%$  and  $P$  for heterogeneity was  $>0.05$ ; otherwise, the summary estimates (95% CI) were measured by random-effect models. Forest and funnel plots were generated by "meta" package in R version 3.4.1. MHT, menopausal hormone therapy; MI, myocardial infarction; SE, summary estimates.

Supplementary Figure S4.4.7. MHT and MI in observational studies: subgroup results by study design.

(a) cohort

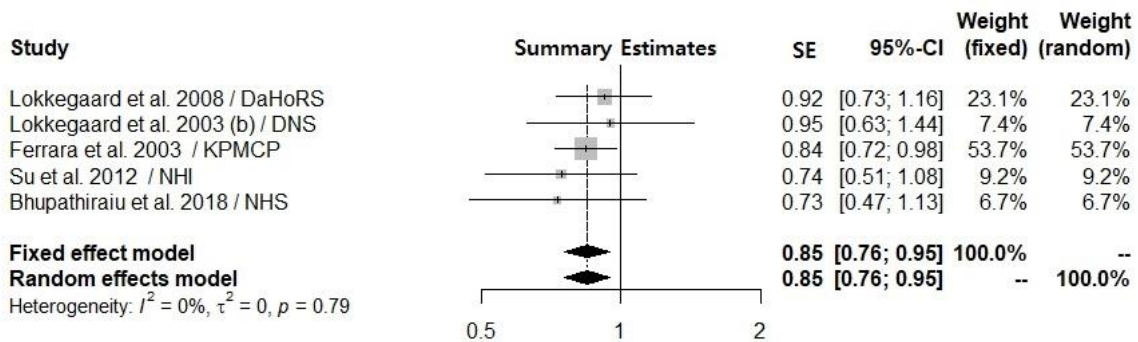

(b) case-control study

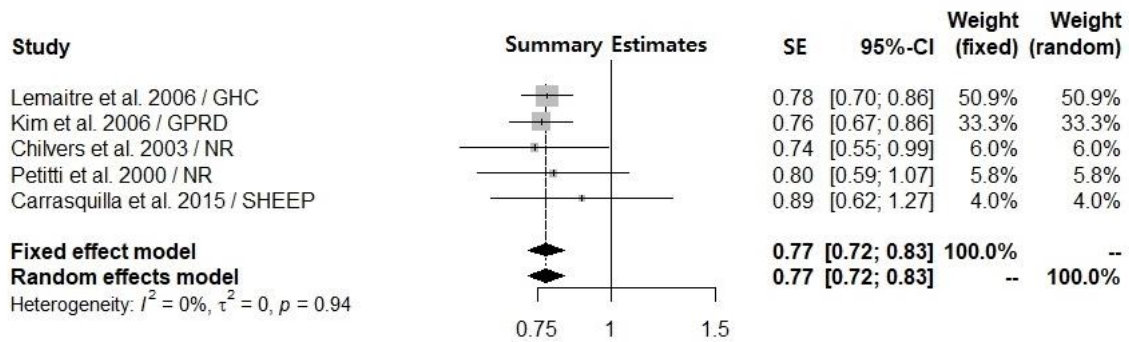

Summary estimates (95% CI) were measured by fixed-effect models if  $I^2$  was  $<30\%$  and  $P$  for heterogeneity was  $>0.05$ ; otherwise, the summary estimates (95% CI) were measured by random-effect models. Forest and funnel plots were generated by "meta" package in R version 3.4.1. MHT, menopausal hormone therapy; MI, myocardial infarction; SE, summary estimates.



Supplementary Figure S4.4.8. MHT and MI in observational studies: subgroup results by study quality.

(a) good and fair

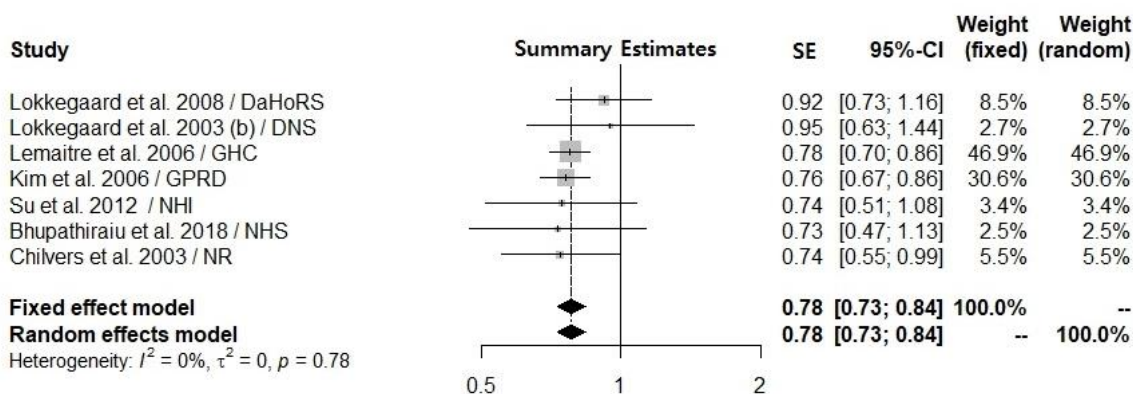

(b) poor

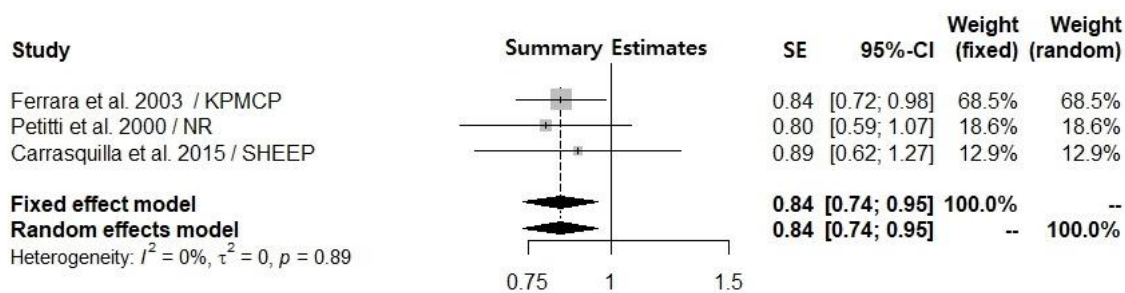

Summary estimates (95% CI) were measured by fixed-effect models if  $I^2$  was  $<30\%$  and  $P$  for heterogeneity was  $>0.05$ ; otherwise, the summary estimates (95% CI) were measured by random-effect models. Forest and funnel plots were generated by "meta" package in R version 3.4.1. MHT, menopausal hormone therapy; MI, myocardial infarction; SE, summary estimates.
